# Supplementary material for: Organocatalytic site- and stereoselective 1,6-additions of N-aryl-3-oxobutanamides to propargylic aza-p-quinone methides
Source: Royal Society of Chemistry journal article supplement (doi:10.1039/d0qo00888e), 2020-01-01
Supplement: d0qo00888e1.pdf [file d0qo00888e1.pdf]

## Supporting Information

Fushuai Li,<sup>+,a</sup> Xuling Chen,<sup>+,b</sup> Shuai Liang,<sup>a</sup> Zhenyan Shi,<sup>a</sup> Pengfei Li,<sup>\*,b</sup> and Wenjun Li<sup>\*,a</sup>

<sup>a</sup> Department of Medicinal Chemistry, School of Pharmacy, Qingdao University, Qingdao 266021, China.

<sup>b</sup> Shenzhen Grubbs Institute, Department of Chemistry, Guangdong Provincial Key Laboratory of Catalysis, Southern University of Science and Technology (SUSTech), Shenzhen 518055, China.

|                                                     |    |
|-----------------------------------------------------|----|
| A: General Information and Starting Materials ..... | 2  |
| B: General Procedure .....                          | 2  |
| C: Characterization Data .....                      | 3  |
| D: Large Scale Reaction .....                       | 14 |
| E: Control Experiment .....                         | 15 |
| F: Synthetic Transformations.....                   | 16 |
| G: ESI-MS Studies.....                              | 19 |
| H: Possible Transition State.....                   | 21 |
| I: HPLC Analysis .....                              | 22 |
| J: NMR Analysis.....                                | 45 |
| K: X-Ray Analysis Data .....                        | 71 |
| L: Reference.....                                   | 73 |

## A: General Information and Starting Materials

**General Information.** Proton nuclear magnetic resonance ( $^1\text{H}$  NMR) spectra and carbon nuclear magnetic resonance ( $^{13}\text{C}$  NMR) spectra were recorded on a Bruker ACF300 spectrometer (500 MHz and 125 MHz). Chemical shifts for protons are reported in parts per million downfield from tetramethylsilane and are referenced to residual protium in the NMR solvent ( $(\text{CD}_3)_2\text{SO}$ :  $\delta$  2.50). Chemical shifts for carbon are reported in parts per million downfield from tetramethylsilane and are referenced to the carbon resonances of the solvent ( $(\text{CD}_3)_2\text{SO}$ :  $\delta$  39.50). Data are represented as follows: chemical shift, integration, multiplicity (br = broad, s = singlet, d = doublet, t = triplet, q = quartet, m = multiplet), coupling constants in Hertz (Hz). All high resolution mass spectra were obtained on a Finnigan/MAT 95XL-T mass spectrometer. Optical Rotation was measured on a Rudolph Autopol I polarimeter. For thin layer chromatography (TLC), Merck pre-coated TLC plates (Merck 60 F254) were used, and compounds were visualized with a UV light at 254 nm. Flash chromatography separations were performed on Merck 60 (0.040-0.063 mm) mesh silica gel.

**Starting Materials.** All solvents, inorganic reagents and 3-oxo-*N*-phenylbutanamide were from commercial sources and used without purification unless otherwise noted. The propargylic alcohols were prepared following the literature procedures.<sup>1</sup>

## B: General Procedure

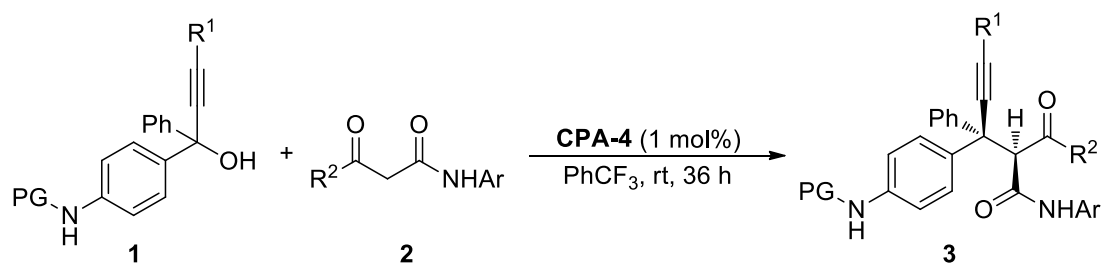

To a solution of  $\text{PhCF}_3$  (0.3 mL) was added propargylic alcohol **1** (0.06 mmol), 3-oxo-*N*-phenylbutanamide **2** (0.05 mmol) and CPA-4 (0.0005 mmol). The reaction mixture was stirred at room temperature for 36 h and then the solvent was removed under vacuum. The residue was purified by silica gel chromatography to yield the desired product **3**.

### C: Characterization Data

#### (1*r*,3*R*,5*S*)-*N*-(4-((3*R*,4*S*)-5-oxo-1,3-diphenyl-4-(phenylcarbamoyl)hex-1-yn-3-yl)phenyl)adamantane-1-carboxamide (3aa)

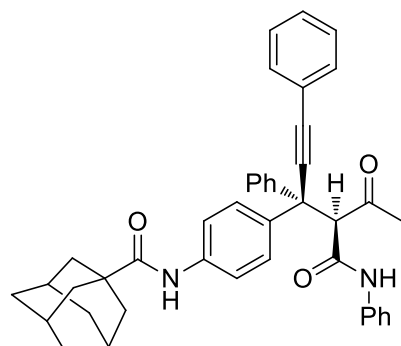

Eluent for flash column chromatography: petroleum ether/ethyl acetate = 6:1. Yellow solid, 29.1 mg, 94% yield. mp 107.3-110.7 °C. <sup>1</sup>H NMR ((CD<sub>3</sub>)<sub>2</sub>SO, 500 MHz): δ (ppm) 9.96 (s, 1H), 9.03 (s, 1H), 7.59-7.56 (m, 4H), 7.51 (s, 4H), 7.43-7.42 (m, 3H), 7.37-7.33 (m, 4H), 7.25-7.20 (m, 3H), 7.03-7.00 (m, 1H), 5.07 (s, 1H), 2.15 (s, 3H), 1.96 (s, 3H), 1.82 (s, 6H), 1.65 (s, 6H). <sup>13</sup>C NMR ((CD<sub>3</sub>)<sub>2</sub>SO, 125 MHz): δ (ppm) 202.0, 176.3, 165.1, 144.0, 138.8, 138.4, 138.1, 131.7, 129.2, 129.1, 128.9, 127.3, 127.2, 127.1, 124.2, 123.5, 120.2, 120.1, 119.8, 92.4, 87.9, 68.0, 50.4, 41.3, 38.7, 36.4, 30.4, 28.1. HRMS (ESI): exact mass calculated for [M+Na]<sup>+</sup> (C<sub>42</sub>H<sub>40</sub>O<sub>3</sub>N<sub>2</sub>Na) requires m/z 643.2931, found m/z 643.2938. The enantiomeric excess was determined to be 95% by HPLC. [ID column, 254 nm, *n*-hexane:EtOH = 80:20, 1.0 mL/min]: 7.9 min (minor), 13.6 min (major). [α]<sup>22</sup><sub>D</sub> = 69.00 (c = 1.00, CH<sub>2</sub>Cl<sub>2</sub>).

#### *N*-(4-((3*R*,4*S*)-5-oxo-1,3-diphenyl-4-(phenylcarbamoyl)hex-1-yn-3-yl)phenyl)-3,5-bis(trifluoromethyl)benzamide (3ba)

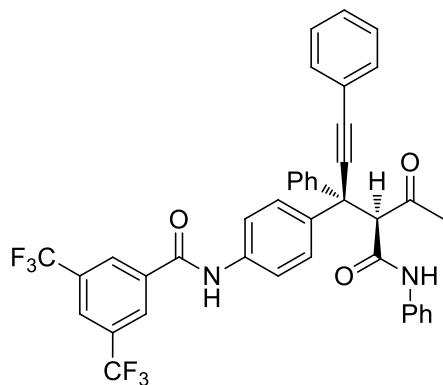

Eluent for flash column chromatography: petroleum ether/ethyl acetate = 8:1. Yellow solid, 33.1 mg, 95% yield. mp 113.3-116.0 °C. <sup>1</sup>H NMR ((CD<sub>3</sub>)<sub>2</sub>SO, 500 MHz): δ (ppm) 10.61 (s, 1H), 9.99 (s, 1H), 8.53 (s, 2H), 8.31 (s, 1H), 7.66-7.64 (m, 6H), 7.61-7.60 (m, 2H), 7.45-7.37 (m, 7H), 7.26-7.23 (m, 3H), 7.03-7.00 (m, 1H), 5.12 (s, 1H), 2.20 (s, 3H). <sup>13</sup>C NMR ((CD<sub>3</sub>)<sub>2</sub>SO, 125 MHz): δ (ppm) 201.9, 165.1, 162.9, 143.8, 139.5, 138.8, 137.5, 137.4, 131.8, 131.0, 130.8, 129.2, 129.1 (2), 128.9, 128.8, 127.7, 127.3, 127.2, 124.6, 124.2, 123.5, 122.4, 120.7, 119.9, 92.3, 88.0, 68.0, 50.5, 30.4. <sup>19</sup>F NMR ((CD<sub>3</sub>)<sub>2</sub>SO, 470 MHz): δ (ppm) -61.34. HRMS (ESI): exact mass calculated for [M+Na]<sup>+</sup> (C<sub>40</sub>H<sub>28</sub>O<sub>3</sub>N<sub>2</sub>F<sub>6</sub>Na) requires m/z 721.1896, found m/z 721.1900. The enantiomeric excess was determined to be 94% by HPLC. [IA column, 254 nm, *n*-hexane:IPA = 90:10, 1.0 mL/min]: 8.9 min (minor), 11.3 min (major). [α]<sup>22</sup><sub>D</sub> = 47.90 (c = 1.00, CH<sub>2</sub>Cl<sub>2</sub>).

#### (2*S*,3*R*)-2-acetyl-*N*,3,5-triphenyl-3-(4-pivalamidophenyl)pent-4-ynamide (3ca)

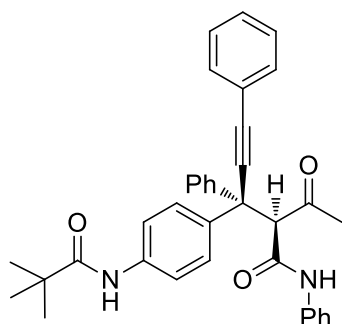

Eluent for flash column chromatography: petroleum ether/ethyl acetate = 6:1. Yellow solid, 23.5 mg, 87% yield. mp 149.8-152.4 °C. <sup>1</sup>H NMR ((CD<sub>3</sub>)<sub>2</sub>SO, 500 MHz): δ (ppm) 9.94 (s, 1H), 9.11 (s, 1H), 7.59-7.56 (m, 4H), 7.51 (s, 4H), 7.43-7.42 (m, 3H), 7.37-7.33 (m, 4H), 7.25-7.20 (m, 3H), 7.03-7.00 (m, 1H), 5.06 (s, 1H), 2.16 (s, 3H), 1.14 (s, 9H). <sup>13</sup>C NMR ((CD<sub>3</sub>)<sub>2</sub>SO, 125 MHz): δ (ppm) 202.0, 176.8, 165.1, 144.0, 138.8, 138.4, 138.2, 131.7, 129.2, 129.1, 128.9, 127.4, 127.3, 127.2, 124.2, 123.5, 120.2, 119.8, 110.0, 92.4, 87.9, 68.0, 50.4, 30.4, 29.5, 27.6. HRMS (ESI): exact mass calculated for [M+Na]<sup>+</sup> (C<sub>36</sub>H<sub>34</sub>O<sub>3</sub>N<sub>2</sub>Na) requires m/z 565.2462, found m/z 565.2466. The enantiomeric excess was determined to be 84% by HPLC. [ID column, 254 nm, *n*-hexane: EtOH = 70:30, 1.0 mL/min]: 4.9 min (minor), 6.3 min (major). [α]<sub>D</sub><sup>22</sup> = 78.00 (c = 1.00, CH<sub>2</sub>Cl<sub>2</sub>).

**(1r,3R,5S)-N-(4-((3R,4S)-1-(4-fluorophenyl)-5-oxo-3-phenyl-4-(phenylcarbamoyl)hex-1-yn-3-yl)phenyl)adamantane-1-carboxamide (3ea)**

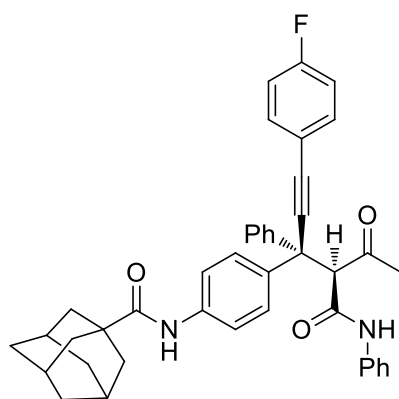

Eluent for flash column chromatography: petroleum ether/ethyl acetate = 6:1. Yellow solid, 24.3 mg, 76% yield. mp 119.6-120.3 °C. <sup>1</sup>H NMR ((CD<sub>3</sub>)<sub>2</sub>SO, 500 MHz): δ (ppm) 9.94 (s, 1H), 9.02 (s, 1H), 7.63-7.56 (m, 4H), 7.52-7.48 (m, 4H), 7.36-7.33 (m, 4H), 7.29-7.22 (m, 5H), 7.03-7.00 (m, 1H), 5.06 (s, 1H), 2.14 (s, 3H), 1.95 (s, 3H), 1.82 (s, 6H), 1.65 (s, 6H). <sup>13</sup>C NMR ((CD<sub>3</sub>)<sub>2</sub>SO, 125 MHz): δ (ppm) 201.9, 176.3, 165.0, 162.3 (d, *J* = 985.0 Hz), 143.9, 138.8, 138.2 (d, *J* = 140.0 Hz), 134.0, 133.9, 129.2, 128.9, 127.3, 127.2, 127.1, 124.2, 120.2, 120.0, 119.8, 116.3 (d, *J* = 85.0 Hz), 92.1, 86.8, 67.9, 50.4, 41.3, 38.7, 36.4, 30.4, 28.1. <sup>19</sup>F NMR ((CD<sub>3</sub>)<sub>2</sub>SO, 470 MHz): δ (ppm) -111.15. HRMS (ESI): exact mass calculated for [M+Na]<sup>+</sup> (C<sub>42</sub>H<sub>39</sub>O<sub>3</sub>N<sub>2</sub>FN<sub>a</sub>) requires m/z 661.2837, found m/z 661.2839. The enantiomeric excess was determined to be 88% by HPLC. [ID column, 254 nm, *n*-hexane: EtOH = 70:30, 1.0 mL/min]: 5.5 min (minor), 9.0 min (major). [α]<sub>D</sub><sup>22</sup> = 51.00 (c = 1.00, CH<sub>2</sub>Cl<sub>2</sub>).

**(1r,3R,5S)-N-(4-((3R,4S)-1-(4-chlorophenyl)-5-oxo-3-phenyl-4-(phenylcarbamoyl)hex-1-yn-3-yl)phenyl)adamantane-1-carboxamide (3fa)**

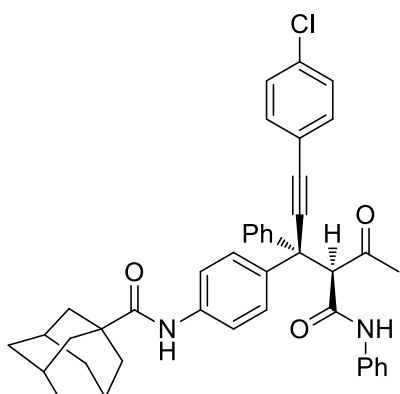

Eluent for flash column chromatography: petroleum ether/ethyl acetate = 6:1. Yellow solid, 26.9 mg, 82% yield. mp 110.4-112.4 °C. <sup>1</sup>H NMR ((CD<sub>3</sub>)<sub>2</sub>SO, 500 MHz): δ (ppm) 9.95 (s, 1H), 9.03 (s, 1H), 7.59-7.55 (m, 4H), 7.52-7.47 (m, 6H), 7.36-7.33 (m, 4H), 7.25-7.20 (m, 3H), 7.03-7.00 (m, 1H), 5.07 (s, 1H), 2.14 (s, 3H), 1.95 (s, 3H), 1.81 (s, 6H), 1.64 (s, 6H).

$^{13}\text{C}$  NMR ( $(\text{CD}_3)_2\text{SO}$ , 125 MHz):  $\delta$  (ppm) 201.8, 176.3, 165.0, 143.8, 138.8, 138.4, 138.0, 133.5, 130.1, 129.3 (2), 129.2, 128.9, 127.3, 127.1, 124.2, 122.4, 120.2, 119.9, 93.7, 86.7, 67.9, 50.4, 41.3, 38.7, 36.4, 30.4, 28.1. HRMS (ESI): exact mass calculated for  $[\text{M}+\text{Na}]^+$  ( $\text{C}_{42}\text{H}_{39}\text{O}_3\text{N}_2\text{ClNa}$ ) requires  $m/z$  677.2541, found  $m/z$  677.2543. The enantiomeric excess was determined to be 82% by HPLC. [ID column, 254 nm, *n*-hexane:EtOH = 70:30, 1.0 mL/min]: 5.6 min (minor), 9.0 min (major).  $[\alpha]_{\text{D}}^{22} = 40.00$  ( $c = 1.00$ ,  $\text{CH}_2\text{Cl}_2$ ).

**(1*r*,3*R*,5*S*)-*N*-(4-((3*R*,4*S*)-1-(4-bromophenyl)-5-oxo-3-phenyl-4-(phenylcarbamoyl)hex-1-yn-3-yl)phenyl)adamantane-1-carboxamide (3ga)**

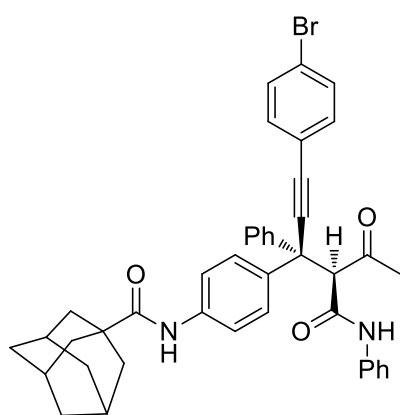

Eluent for flash column chromatography: petroleum ether/ethyl acetate = 6:1. Yellow solid, 26.7 mg, 76% yield. mp 119.2-121.0 °C.  $^1\text{H}$  NMR ( $(\text{CD}_3)_2\text{SO}$ , 500 MHz):  $\delta$  (ppm) 9.95 (s, 1H), 9.02 (s, 1H), 7.64-7.62 (m, 2H), 7.56-7.55 (m, 2H), 7.52-7.47 (m, 6H), 7.36-7.33 (m, 4H), 7.25-7.20 (m, 3H), 7.03-7.00 (m, 1H), 5.07 (s, 1H), 2.14 (s, 3H), 1.95 (s, 3H), 1.82 (s, 6H), 1.64 (s, 6H).  $^{13}\text{C}$  NMR ( $(\text{CD}_3)_2\text{SO}$ , 125 MHz):  $\delta$  (ppm) 201.7, 176.3, 165.0, 143.8, 138.8, 138.4, 137.9, 133.7, 132.2 (2), 129.2, 128.9, 127.3, 127.1, 124.2, 122.8, 122.1, 120.2, 119.9, 93.9, 86.7, 67.9, 50.4, 41.3, 38.7, 36.4, 30.4, 28.1. HRMS (ESI): exact mass calculated for  $[\text{M}+\text{Na}]^+$  ( $\text{C}_{42}\text{H}_{39}\text{O}_3\text{N}_2\text{BrNa}$ ) requires  $m/z$  721.2036, found  $m/z$  721.2039. The enantiomeric excess was determined to be 87% by HPLC. [ID column, 254 nm, *n*-hexane: EtOH = 70:30, 1.0 mL/min]: 5.9 min (minor), 9.4 min (major).  $[\alpha]_{\text{D}}^{22} = 39.60$  ( $c = 1.00$ ,  $\text{CH}_2\text{Cl}_2$ ).

**(1*r*,3*R*,5*S*)-*N*-(4-((3*R*,4*S*)-1-(4-methoxyphenyl)-5-oxo-3-phenyl-4-(phenylcarbamoyl)hex-1-yn-3-yl)phenyl)adamantane-1-carboxamide (3ha)**

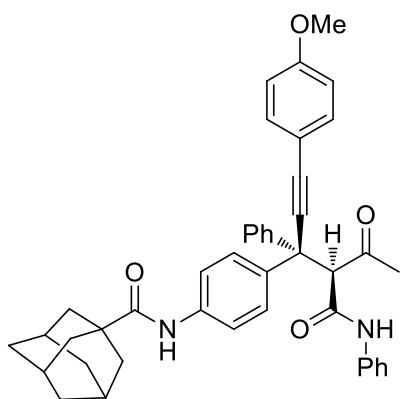

Eluent for flash column chromatography: petroleum ether/ethyl acetate = 5:1. Yellow solid, 22.5 mg, 69% yield. mp 126.0-127.1 °C.  $^1\text{H}$  NMR ( $(\text{CD}_3)_2\text{SO}$ , 500 MHz):  $\delta$  (ppm) 9.91 (s, 1H), 9.03 (s, 1H), 7.59 (d,  $J = 5.0$  Hz, 2H), 7.51-7.49 (m, 5H), 7.37-7.35 (m, 2H), 7.34-7.32 (m, 2H), 7.25-7.19 (m, 4H), 7.03-7.01 (m, 1H), 7.00-6.98 (m, 2H), 5.04 (s, 1H), 3.78 (s, 3H), 2.14 (s, 3H), 1.96 (s, 3H), 1.82 (s, 6H), 1.65 (s, 6H).  $^{13}\text{C}$  NMR ( $(\text{CD}_3)_2\text{SO}$ , 125 MHz):  $\delta$  (ppm) 202.2, 176.3, 165.1, 159.7, 144.1, 138.8, 138.7, 138.3, 133.2, 129.2, 128.8, 127.3, 127.2, 124.1, 120.2, 119.8, 115.4, 114.7, 114.6, 90.6, 87.9, 68.1, 55.7, 50.5, 41.3, 38.7, 36.4, 30.5, 28.1. HRMS (ESI): exact mass calculated for  $[\text{M}+\text{Na}]^+$  ( $\text{C}_{43}\text{H}_{42}\text{O}_4\text{N}_2\text{Na}$ ) requires  $m/z$  673.3042, found  $m/z$  673.3023. The enantiomeric excess was determined to be 70% by HPLC. [ID column,

254 nm, *n*-hexane: EtOH = 70:30, 1.0 mL/min]: 9.1 min (minor), 14.5 min (major).  $[\alpha]_D^{22} = 59.00$  ( $c = 1.00$ ,  $\text{CH}_2\text{Cl}_2$ ).

**(1*r*,3*R*,5*S*)-*N*-(4-((3*R*,4*S*)-1-(3-fluorophenyl)-5-oxo-3-phenyl-4-(phenylcarbamoyl)hex-1-yn-3-yl)phenyl)adamantane-1-carboxamide (3ia)**

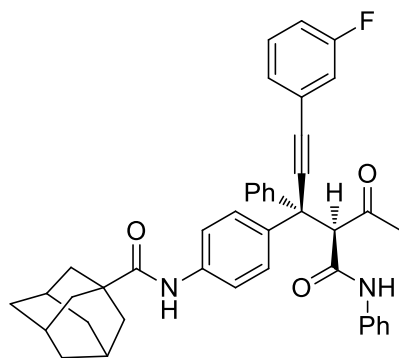

Eluent for flash column chromatography: petroleum ether/ethyl acetate = 6:1. Yellow solid, 24.9 mg, 78% yield. mp 113.7-116.4 °C.  $^1\text{H}$  NMR ( $(\text{CD}_3)_2\text{SO}$ , 500 MHz):  $\delta$  (ppm) 9.97 (s, 1H), 9.03 (s, 1H), 7.57-7.56 (m, 2H), 7.53-7.47 (m, 5H), 7.41-7.33 (m, 6H), 7.28-7.22 (m, 4H), 7.03-7.00 (m, 1H), 5.08 (s, 1H), 2.15 (s, 3H), 1.95 (s, 3H), 1.82 (s, 6H), 1.64 (s, 6H).  $^{13}\text{C}$  NMR ( $(\text{CD}_3)_2\text{SO}$ , 125 MHz):  $\delta$  (ppm) 201.7, 176.3, 165.0, 162.4 (d,  $J = 970.0$  Hz), 143.8, 138.8, 138.4, 137.9, 131.3 (d,  $J = 35.0$  Hz), 129.2, 128.9, 128.1 (d,  $J = 10.0$  Hz), 127.3, 127.1, 125.5 (d,  $J = 40.0$  Hz), 124.2, 120.2, 119.9, 118.3 (d,  $J = 90.0$  Hz), 116.1 (d,  $J = 85.0$  Hz), 110.0, 93.8, 86.6, 67.9, 50.4, 41.3, 38.7, 36.4, 30.4, 28.1.  $^{19}\text{F}$  NMR ( $(\text{CD}_3)_2\text{SO}$ , 470 MHz):  $\delta$  (ppm) -112.74. HRMS (ESI): exact mass calculated for  $[\text{M}+\text{Na}]^+$  ( $\text{C}_{42}\text{H}_{39}\text{O}_3\text{N}_2\text{FNa}$ ) requires  $m/z$  661.2837, found  $m/z$  661.2836. The enantiomeric excess was determined to be 90% by HPLC. [ID column, 254 nm, *n*-hexane: EtOH = 70:30, 1.0 mL/min]: 5.1 min (minor), 8.1 min (major).  $[\alpha]_D^{22} = 53.60$  ( $c = 1.00$ ,  $\text{CH}_2\text{Cl}_2$ ).

**(1*r*,3*R*,5*S*)-*N*-(4-((3*R*,4*S*)-1-(3-bromophenyl)-5-oxo-3-phenyl-4-(phenylcarbamoyl)hex-1-yn-3-yl)phenyl)adamantane-1-carboxamide (3ja)**

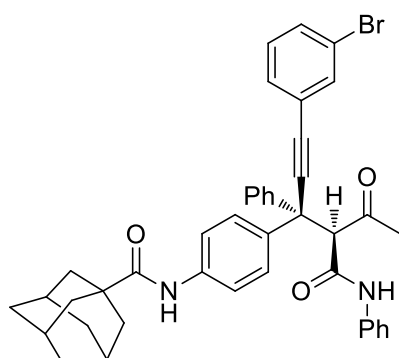

Eluent for flash column chromatography: petroleum ether/ethyl acetate = 6:1. Yellow solid, 29.1 mg, 83% yield. mp 142.9-143.9 °C.  $^1\text{H}$  NMR ( $(\text{CD}_3)_2\text{SO}$ , 500 MHz):  $\delta$  (ppm) 9.97 (s, 1H), 9.03 (s, 1H), 7.74 (s, 1H), 7.62 (d,  $J = 10.0$  Hz, 1H), 7.57-7.55 (m, 3H), 7.53-7.47 (m, 4H), 7.40-7.33 (m, 5H), 7.25-7.20 (m, 3H), 7.03-7.00 (m, 1H), 5.09 (s, 1H), 2.14 (s, 3H), 1.95 (s, 3H), 1.82 (s, 6H), 1.64 (s, 6H).  $^{13}\text{C}$  NMR ( $(\text{CD}_3)_2\text{SO}$ , 125 MHz):  $\delta$  (ppm) 201.7, 176.3, 164.9, 143.7, 138.8, 138.4, 137.9, 133.9, 131.8, 131.2, 130.8, 129.2, 128.9, 127.3, 127.1, 125.8, 124.2, 122.1, 120.2, 119.9, 110.0, 94.2, 86.2, 67.9, 50.4, 41.3, 38.7, 36.4, 30.4, 28.1. HRMS (ESI): exact mass calculated for  $[\text{M}+\text{Na}]^+$  ( $\text{C}_{42}\text{H}_{39}\text{O}_3\text{N}_2\text{BrNa}$ ) requires  $m/z$  721.2036, found  $m/z$  721.2041. The enantiomeric excess was determined to be 81% by HPLC. [ID column, 254 nm, *n*-hexane: EtOH = 70:30, 1.0 mL/min]: 5.3 min (minor), 9.3 min (major).  $[\alpha]_D^{22} = 44.00$  ( $c = 1.00$ ,  $\text{CH}_2\text{Cl}_2$ ).

**(1*r*,3*R*,5*S*)-*N*-(4-((3*R*,4*S*)-5-oxo-3-phenyl-4-(phenylcarbamoyl)-1-(*m*-tolyl)hex-1-yn-3-yl)phenyl)adamantane-1-carboxamide (3ka)**

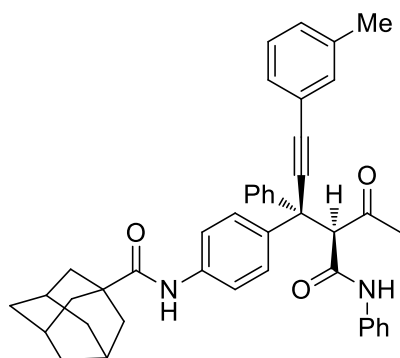

Eluent for flash column chromatography: petroleum ether/ethyl acetate = 6:1. Yellow solid, 30.2 mg, 95% yield. mp 117.9-120.1 °C. <sup>1</sup>H NMR ((CD<sub>3</sub>)<sub>2</sub>SO, 500 MHz): δ (ppm) 9.93 (s, 1H), 9.03 (s, 1H), 7.58 (d, *J* = 10.0 Hz, 2H), 7.53-7.49 (m, 4H), 7.38-7.29 (m, 7H), 7.25-7.20 (m, 4H), 7.03-7.00 (m, 1H), 5.05 (s, 1H), 2.32 (s, 3H), 2.15 (s, 3H), 1.96 (s, 3H), 1.82 (s, 6H), 1.65 (s, 6H). <sup>13</sup>C NMR ((CD<sub>3</sub>)<sub>2</sub>SO, 125 MHz): δ (ppm) 202.0, 176.3, 165.1, 144.0, 138.8, 138.4, 138.3, 138.2, 132.1, 129.6, 129.2, 129.0, 128.9, 128.8, 127.3, 127.2, 127.1, 124.2, 123.3, 120.2, 119.8, 92.0, 88.0, 68.0, 50.4, 41.3, 38.7, 36.4, 30.4, 28.1, 21.2. HRMS (ESI): exact mass calculated for [M+Na]<sup>+</sup> (C<sub>43</sub>H<sub>42</sub>O<sub>3</sub>N<sub>2</sub>Na) requires *m/z* 657.3088, found *m/z* 657.3089. The enantiomeric excess was determined to be 85% by HPLC. [ID column, 254 nm, *n*-hexane: EtOH = 70:30, 1.0 mL/min]: 5.6 min (minor), 9.5 min (major). [α]<sub>D</sub><sup>22</sup> = 58.70 (c = 1.00, CH<sub>2</sub>Cl<sub>2</sub>).

**(1r,3R,5S)-N-(4-((3R,4S)-1-(2-fluorophenyl)-5-oxo-3-phenyl-4-(phenylcarbamoyl)hex-1-yn-3-yl)phenyl)adamantane-1-carboxamide (3la)**

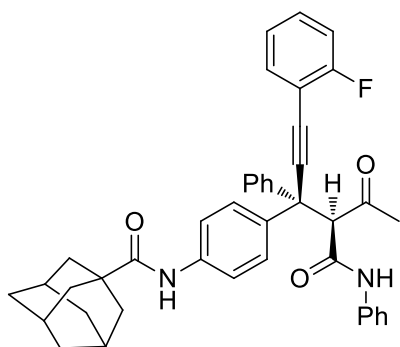

Eluent for flash column chromatography: petroleum ether/ethyl acetate = 6:1. Yellow solid, 31.9 mg, 99% yield. mp 147.1-149.6 °C. <sup>1</sup>H NMR ((CD<sub>3</sub>)<sub>2</sub>SO, 500 MHz): δ (ppm) 9.97 (s, 1H), 9.03 (s, 1H), 7.63-7.60 (m, 1H), 7.58 (d, *J* = 5.0 Hz, 1H), 7.51 (s, 4H), 7.47-7.44 (m, 1H), 7.36-7.31 (m, 5H), 7.28-7.20 (m, 5H), 7.03-7.00 (m, 1H), 5.07 (s, 1H), 2.16 (s, 3H), 1.95 (s, 3H), 1.82 (s, 6H), 1.64 (s, 6H). <sup>13</sup>C NMR ((CD<sub>3</sub>)<sub>2</sub>SO, 125 MHz): δ (ppm) 201.8, 176.4, 165.0, 162.6 (d, *J* = 990.0 Hz), 143.7, 138.8, 138.4, 137.9, 133.9, 131.0 (d, *J* = 30.0 Hz), 129.2, 128.9, 127.3, 127.2, 127.1, 125.2 (d, *J* = 15.0 Hz), 124.2, 120.2, 119.9, 116.2 (d, *J* = 80.0 Hz), 111.7 (d, *J* = 65.0 Hz), 97.7, 81.4, 67.9, 50.6, 41.3, 38.7, 36.4, 30.3, 28.1. <sup>19</sup>F NMR ((CD<sub>3</sub>)<sub>2</sub>SO, 470 MHz): δ (ppm) -110.65. HRMS (ESI): exact mass calculated for [M+Na]<sup>+</sup> (C<sub>42</sub>H<sub>39</sub>O<sub>3</sub>N<sub>2</sub>FNa) requires *m/z* 661.2837, found *m/z* 661.2836. The enantiomeric excess was determined to be 90% by HPLC. [ID column, 254 nm, *n*-hexane: EtOH = 70:30, 1.0 mL/min]: 6.3 min (minor), 8.7 min (major). [α]<sub>D</sub><sup>22</sup> = 48.00 (c = 1.00, CH<sub>2</sub>Cl<sub>2</sub>).

**(1r,3R,5S)-N-(4-((3R,4S)-1-(2-chlorophenyl)-5-oxo-3-phenyl-4-(phenylcarbamoyl)hex-1-yn-3-yl)phenyl)adamantane-1-carboxamide (3ma)**

Eluent for flash column chromatography: petroleum ether/ethyl acetate = 6:1. Yellow solid, 24.1 mg, 74% yield. mp 141.5-145.4 °C. <sup>1</sup>H NMR ((CD<sub>3</sub>)<sub>2</sub>SO, 500 MHz): δ (ppm) 9.97 (s, 1H), 9.03 (s, 1H), 7.64-7.60 (m, 4H), 7.58-7.55 (m, 2H), 7.53-7.51 (m, 2H), 7.44-7.40 (m, 2H), 7.38-7.33 (m, 4H), 7.25-7.22 (m, 3H), 7.03-7.00 (m, 1H), 5.09 (s, 1H), 2.16 (s, 3H), 1.95 (s, 3H), 1.82 (s, 6H), 1.64 (s, 6H). <sup>13</sup>C NMR

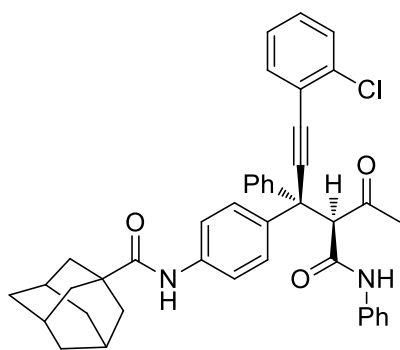

((CD<sub>3</sub>)<sub>2</sub>SO, 125 MHz):  $\delta$  (ppm) 201.8, 176.3, 165.0, 143.8, 138.8, 138.4, 137.9, 134.9, 134.1, 130.4, 129.8, 129.2, 128.9, 127.8, 127.3, 127.2, 124.2, 123.2, 120.2, 119.9, 110.0, 97.8, 84.7, 67.9, 50.7, 41.3, 38.7, 36.4, 30.5, 28.1. HRMS (ESI): exact mass calculated for [M+Na]<sup>+</sup> (C<sub>42</sub>H<sub>39</sub>O<sub>3</sub>N<sub>2</sub>ClNa) requires m/z 677.2541, found m/z 677.2545. The enantiomeric excess was determined to be 84% by HPLC. [ID column, 254 nm, *n*-hexane: EtOH = 70:30, 1.0 mL/min]: 5.8 min (minor), 8.7 min (major).  $[\alpha]_D^{22} = 42.70$  (c = 1.00, CH<sub>2</sub>Cl<sub>2</sub>).

**(1r,3R,5S)-N-(4-((3R,4S)-1-(2-bromophenyl)-5-oxo-3-phenyl-4-(phenylcarbamoyl)hex-1-yn-3-yl)phenyl)adamantane-1-carboxamide (3na)**

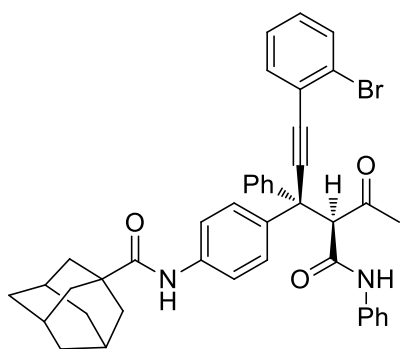

Eluent for flash column chromatography: petroleum ether/ethyl acetate = 6:1. Yellow solid, 24.3 mg, 70% yield. mp 143.0-146.8 °C. <sup>1</sup>H NMR ((CD<sub>3</sub>)<sub>2</sub>SO, 500 MHz):  $\delta$  (ppm) 9.96 (s, 1H), 9.03 (s, 1H), 7.74 (d, *J* = 10.0 Hz, 1H), 7.64-7.61 (m, 3H), 7.58-7.56 (m, 2H), 7.52-7.51 (m, 1H), 7.46-7.43 (m, 1H), 7.37-7.33 (m, 5H), 7.25-7.20 (m, 4H), 7.03-7.00 (m, 1H), 5.09 (s, 1H), 2.16 (s, 3H), 1.95 (s, 3H), 1.82 (s, 6H), 1.64 (s, 6H). <sup>13</sup>C NMR ((CD<sub>3</sub>)<sub>2</sub>SO, 125 MHz):  $\delta$  (ppm) 201.8, 176.3, 165.0, 143.7, 138.8, 138.4, 137.9, 134.3, 132.9, 130.6, 129.2, 128.9, 128.3, 127.4, 127.3, 127.2, 125.5, 124.7, 124.2, 120.2, 119.9, 97.1, 86.4, 67.9, 50.7, 41.3, 38.7, 36.4, 30.5, 28.1. HRMS (ESI): exact mass calculated for [M+Na]<sup>+</sup> (C<sub>42</sub>H<sub>39</sub>O<sub>3</sub>N<sub>2</sub>BrNa) requires m/z 721.2036, found m/z 721.2038. The enantiomeric excess was determined to be 72% by HPLC. [ID column, 254 nm, *n*-hexane: EtOH = 70:30, 1.0 mL/min]: 5.8 min (minor), 9.1 min (major).  $[\alpha]_D^{22} = 43.00$  (c = 1.00, CH<sub>2</sub>Cl<sub>2</sub>).

**(1r,3R,5S)-N-(4-((3R,4S)-1-(2-methoxyphenyl)-5-oxo-3-phenyl-4-(phenylcarbamoyl)hex-1-yn-3-yl)phenyl)adamantane-1-carboxamide (3oa)**

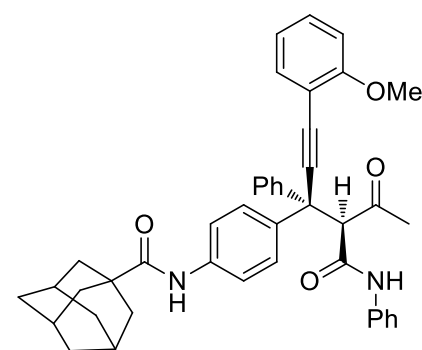

Eluent for flash column chromatography: petroleum ether/ethyl acetate = 5:1. Yellow solid, 28.7 mg, 88% yield. mp 192.6-193.5 °C. <sup>1</sup>H NMR ((CD<sub>3</sub>)<sub>2</sub>SO, 500 MHz):  $\delta$  (ppm) 9.90 (s, 1H), 9.03 (s, 1H), 7.65 (d, *J* = 10.0 Hz, 2H), 7.62-7.60 (m, 2H), 7.53-7.51 (m, 2H), 7.47 (d, *J* = 10.0 Hz, 1H), 7.40-7.37 (m, 2H), 7.35-7.32 (m, 3H), 7.25-7.23 (m, 1H), 7.21-7.19 (m, 2H), 7.10 (d, *J* = 10.0 Hz, 1H), 7.02-7.01 (m, 1H), 7.00-6.97 (m, 1H), 5.04 (s, 1H), 3.87 (s, 3H), 2.19 (s, 3H), 1.96 (s, 3H), 1.82 (s, 6H), 1.65 (s, 6H). <sup>13</sup>C NMR



((CD<sub>3</sub>)<sub>2</sub>SO, 125 MHz):  $\delta$  (ppm) 202.5, 176.3, 165.1, 160.5, 144.1, 138.8, 138.3, 138.2, 133.2, 130.4, 129.2, 128.8, 127.4, 127.3, 127.2, 124.2, 120.9, 120.1, 119.8, 112.5, 111.8, 95.9, 85.1, 68.3, 56.2, 50.8, 41.3, 38.7, 36.4, 30.5, 28.1. HRMS (ESI): exact mass calculated for [M+Na]<sup>+</sup> (C<sub>43</sub>H<sub>42</sub>O<sub>4</sub>N<sub>2</sub>Na) requires m/z 673.3042, found m/z 673.3023. The enantiomeric excess was determined to be 89% by HPLC. [ID column, 254 nm, *n*-hexane: EtOH = 70:30, 1.0 mL/min]: 9.5 min (minor), 12.8 min (major).  $[\alpha]_D^{22} = 49.00$  (c = 1.00, CH<sub>2</sub>Cl<sub>2</sub>).

**(1*r*,3*R*,5*S*)-*N*-(4-((3*S*,4*R*)-2-oxo-4-phenyl-3-(phenylcarbamoyl)dec-5-yn-4-yl)phenyl)adamantane-1-carboxamide (3pa)**

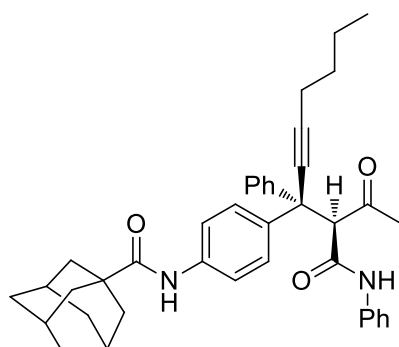

Eluent for flash column chromatography: petroleum ether/ethyl acetate = 7:1. White solid, 25.8 mg, 86% yield. mp 164.1-166.3 °C. <sup>1</sup>H NMR ((CD<sub>3</sub>)<sub>2</sub>SO, 500 MHz):  $\delta$  (ppm) 9.79 (s, 1H), 9.02 (s, 1H), 7.58 (d, *J* = 5.0 Hz, 2H), 7.50 (s, 4H), 7.38 (d, *J* = 10.0 Hz, 2H), 7.34-7.30 (m, 2H), 7.28-7.24 (m, 2H), 7.22-7.18 (m, 1H), 7.05-7.01 (m, 1H), 4.96 (s, 1H), 2.46-2.42 (m, 2H), 2.10 (s, 3H), 1.97 (s, 3H), 1.85 (s, 6H), 1.66 (s, 6H), 1.60-1.57 (m, 2H), 1.53-1.47 (m,

2H), 0.94-0.90 (m, 3H). <sup>13</sup>C NMR ((CD<sub>3</sub>)<sub>2</sub>SO, 125 MHz):  $\delta$  (ppm) 202.6, 176.3, 165.3, 144.6, 138.9, 138.8, 138.2, 129.2, 128.6, 127.3, 127.3, 127.1, 124.1, 120.0, 119.8, 88.9, 82.1, 68.1, 50.1, 41.3, 38.7, 36.5, 30.9, 30.6, 28.1, 21.9, 18.6, 14.0. HRMS (ESI): exact mass calculated for [M+H]<sup>+</sup> (C<sub>40</sub>H<sub>45</sub>O<sub>3</sub>N<sub>2</sub>) requires m/z 601.3425, found m/z 601.3422. The enantiomeric excess was determined to be 83% by HPLC. [ID column, 254 nm, *n*-hexane:IPA = 70:30, 1.0 mL/min]: 12.6 min (minor), 16.2 min (major).  $[\alpha]_D^{22} = 142.70$  (c = 1.00, CH<sub>2</sub>Cl<sub>2</sub>).

**(1*r*,3*R*,5*S*)-*N*-(4-((3*R*,4*S*)-1-cyclopropyl-5-oxo-3-phenyl-4-(phenylcarbamoyl)hex-1-yn-3-yl)phenyl)adamantane-1-carboxamide (3qa)**

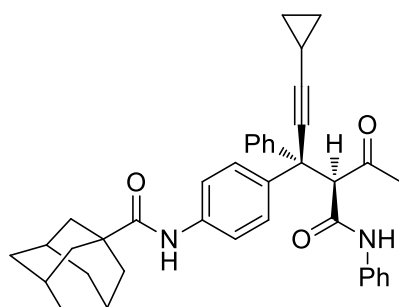

Eluent for flash column chromatography: petroleum ether/ethyl acetate = 6:1. White solid, 20.4 mg, 70% yield. mp 232.2-225.0 °C. <sup>1</sup>H NMR ((CD<sub>3</sub>)<sub>2</sub>SO, 500 MHz):  $\delta$  (ppm) 9.80 (s, 1H), 9.03 (s, 1H), 7.54-7.49 (m, 4H), 7.46-7.44 (m, 2H), 7.39-7.37 (m, 2H), 7.34-7.30 (m, 2H), 7.28-7.24 (m, 2H), 7.21-7.18 (m, 1H), 7.05-7.01 (m, 1H), 4.94 (s, 1H), 2.08 (s, 3H), 1.98 (s, 3H), 1.84 (s, 6H), 1.67 (s, 6H), 1.56-1.52 (m,

1H), 0.89-0.85 (m, 2H), 0.76-0.73 (m, 2H). <sup>13</sup>C NMR ((CD<sub>3</sub>)<sub>2</sub>SO, 125 MHz):  $\delta$  (ppm) 202.1, 175.9, 164.8, 144.0, 138.4, 138.3, 137.8, 128.8, 128.2, 126.8, 126.8, 126.6, 123.7, 119.6, 119.3, 91.4, 76.5, 67.7, 49.6, 40.9, 38.3, 36.0, 30.1, 27.7, 8.0, -0.3. HRMS (ESI): exact mass calculated for [M+H]<sup>+</sup> (C<sub>39</sub>H<sub>41</sub>O<sub>3</sub>N<sub>2</sub>) requires m/z 585.3112, found m/z 585.3109. The enantiomeric excess was determined to be 83% by HPLC. [ID column, 254 nm, *n*-hexane:EtOH = 70:30, 1.0 mL/min]: 7.1 min (minor), 11.2

min (major).  $[\alpha]_D^{22} = 129.40$  ( $c = 1.00$ ,  $\text{CH}_2\text{Cl}_2$ ).

**(1*r*,3*R*,5*S*)-*N*-(4-((3*R*,4*S*)-4-((4-chlorophenyl)carbamoyl)-5-oxo-1,3-diphenylhex-1-yn-3-yl)phenyl)adamantane-1-carboxamide (3ab)**

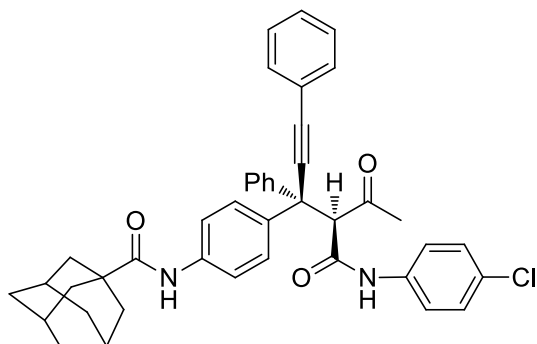

Eluent for flash column chromatography: petroleum ether/ethyl acetate = 6:1. Yellow solid, 25.6 mg, 78% yield. mp 181.5-184.1 °C.  $^1\text{H}$  NMR ( $(\text{CD}_3)_2\text{SO}$ , 500 MHz):  $\delta$  (ppm) 10.12 (s, 1H), 9.03 (s, 1H), 7.59-7.56 (m, 4H), 7.52-7.48 (m, 4H), 7.43-7.39 (m, 5H), 7.36-7.33 (m, 2H), 7.30-7.28 (m, 2H), 7.23-7.20 (m, 1H), 5.04 (s, 1H), 2.14 (s, 3H), 1.96 (s, 3H), 1.82 (s, 6H), 1.65 (s, 6H).  $^{13}\text{C}$  NMR ( $(\text{CD}_3)_2\text{SO}$ , 125 MHz):  $\delta$  (ppm) 201.8, 176.3, 165.2, 143.9, 138.4, 138.1, 137.8, 131.7 (2), 129.1 (2), 129.0, 128.9, 127.7, 127.3, 127.2, 123.5, 121.3, 120.2, 92.3, 87.9, 68.1, 50.4, 41.3, 38.7, 36.4, 30.4, 28.1. HRMS (ESI): exact mass calculated for  $[\text{M}+\text{Na}]^+$  ( $\text{C}_{42}\text{H}_{39}\text{O}_3\text{N}_2\text{ClNa}$ ) requires  $m/z$  677.2541, found  $m/z$  677.2544. The enantiomeric excess was determined to be 76% by HPLC. [ID column, 254 nm, *n*-hexane: EtOH = 70:30, 1.0 mL/min]: 5.0 min (minor), 7.6 min (major).  $[\alpha]_D^{22} = 75.00$  ( $c = 1.00$ ,  $\text{CH}_2\text{Cl}_2$ ).

**(1*r*,3*R*,5*S*)-*N*-(4-((3*R*,4*S*)-5-oxo-1,3-diphenyl-4-(*p*-tolylcarbamoyl)hex-1-yn-3-yl)phenyl)adamantane-1-carboxamide (3ac)**

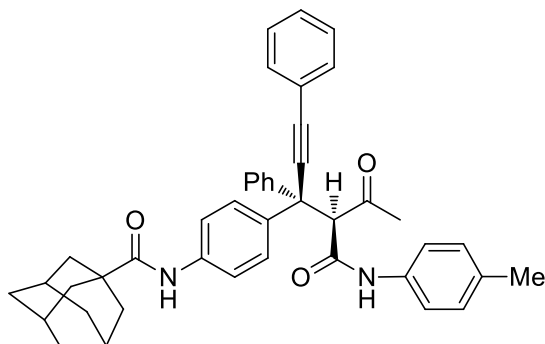

Eluent for flash column chromatography: petroleum ether/ethyl acetate = 6:1. Yellow solid, 27.7 mg, 87% yield. mp 195.6-198.4 °C.  $^1\text{H}$  NMR ( $(\text{CD}_3)_2\text{SO}$ , 500 MHz):  $\delta$  (ppm) 9.83 (s, 1H), 9.03 (s, 1H), 7.58-7.56 (m, 4H), 7.51-7.48 (m, 4H), 7.43-7.41 (m, 3H), 7.36-7.33 (m, 2H), 7.25-7.21 (m, 3H), 7.04-7.02 (m, 2H), 5.03 (s, 1H), 2.20 (s, 3H), 2.16 (s, 3H), 1.96 (s, 3H), 1.82 (s, 6H), 1.65 (s, 6H).  $^{13}\text{C}$  NMR ( $(\text{CD}_3)_2\text{SO}$ , 125 MHz):  $\delta$  (ppm) 202.1, 176.3, 164.8, 144.0, 138.4, 138.1, 136.3, 133.2, 131.7, 129.5, 129.1, 128.8, 127.3, 127.2, 127.1, 123.5, 120.1, 119.8, 110.0, 92.5, 87.9, 68.0, 50.4, 41.3, 38.7, 36.4, 30.4, 28.1, 20.9. HRMS (ESI): exact mass calculated for  $[\text{M}+\text{Na}]^+$  ( $\text{C}_{43}\text{H}_{42}\text{O}_3\text{N}_2\text{Na}$ ) requires  $m/z$  657.3088, found  $m/z$  657.3088. The enantiomeric excess was determined to be 92% by HPLC. [ID column, 254 nm, *n*-hexane: EtOH = 70:30, 1.0 mL/min]: 6.1 min (minor), 9.9 min (major).  $[\alpha]_D^{22} = 61.30$  ( $c = 1.00$ ,  $\text{CH}_2\text{Cl}_2$ ).

**(1*r*,3*R*,5*S*)-*N*-(4-((3*R*,4*S*)-4-((4-methoxyphenyl)carbamoyl)-5-oxo-1,3-diphenylhex-1-yn-3-yl)phenyl)adamantane-1-carboxamide (3ad)**

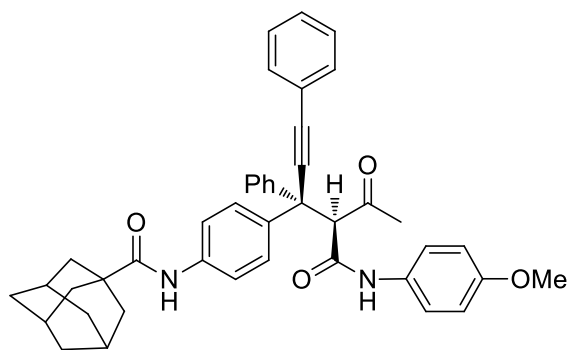

Eluent for flash column chromatography: petroleum ether/ethyl acetate = 5:1. Yellow solid, 29.1 mg, 89% yield. mp 111.7-114.1 °C. <sup>1</sup>H NMR ((CD<sub>3</sub>)<sub>2</sub>SO, 500 MHz): δ (ppm) 9.78 (s, 1H), 9.04 (s, 1H), 7.57-7.56 (m, 4H), 7.53-7.48 (m, 5H), 7.42-7.41 (m, 2H), 7.36-7.33 (m, 2H), 7.25 (d, *J* = 10.0 Hz, 2H), 7.23-7.20 (m, 1H), 6.80 (d, *J* = 10.0 Hz, 2H), 4.99 (s, 1H), 3.67 (s, 3H), 2.16 (s, 3H), 1.96 (s, 3H), 1.83 (s, 6H), 1.65 (s, 6H). <sup>13</sup>C NMR ((CD<sub>3</sub>)<sub>2</sub>SO, 125 MHz): δ (ppm) 202.1, 176.3, 164.6, 156.0, 144.0, 138.4, 138.1, 131.9, 131.7, 129.1, 128.8, 127.4, 127.3, 127.2, 123.5, 121.6, 121.5, 120.1, 114.3, 92.5, 87.8, 67.9, 55.6, 50.4, 41.3, 38.7, 36.4, 30.4, 28.1. HRMS (ESI): exact mass calculated for [M+Na]<sup>+</sup> (C<sub>43</sub>H<sub>42</sub>O<sub>4</sub>N<sub>2</sub>Na) requires *m/z* 673.3037, found *m/z* 673.3039. The enantiomeric excess was determined to be 81% by HPLC. [ID column, 254 nm, *n*-hexane: EtOH = 70:30, 1.0mL/min]: 7.5 min (minor), 12.2 min (major). [α]<sub>D</sub><sup>22</sup> = 47.00 (c = 1.00, CH<sub>2</sub>Cl<sub>2</sub>).

**(1r,3R,5S)-N-(4-((3R,4S)-5-oxo-1,3-diphenyl-4-((4-(trifluoromethyl)phenyl)carbamoyl)hex-1-yn-3-yl)phenyl)adamantane-1-carboxamide (3ae)**

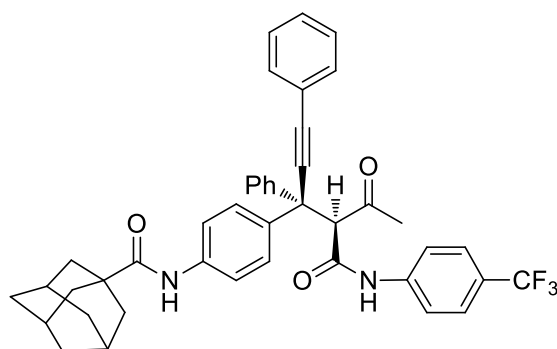

Eluent for flash column chromatography: petroleum ether/ethyl acetate = 7:1. Yellow solid, 28.8 mg, 84% yield. mp 211.0-213.2 °C. <sup>1</sup>H NMR ((CD<sub>3</sub>)<sub>2</sub>SO, 500 MHz): δ (ppm) 10.37 (s, 1H), 9.05 (s, 1H), 7.66-7.65 (m, 7H), 7.63-7.61 (m, 2H), 7.57-7.56 (m, 3H), 7.46-7.43 (m, 3H), 7.41-7.38 (m, 2H), 7.27-7.24 (m, 1H), 5.14 (s, 1H), 2.19 (s, 3H), 1.97 (s, 3H), 1.86 (s, 6H), 1.66 (s, 6H). <sup>13</sup>C NMR ((CD<sub>3</sub>)<sub>2</sub>SO, 125 MHz): δ (ppm) 201.8, 176.4, 165.8, 143.8, 142.4, 138.5, 138.1, 131.8, 129.1, 128.9, 127.4, 127.3, 127.2, 126.5 (q, *J* = 20.0 Hz), 124.4, 124.0, 123.5, 123.4, 120.3, 119.7, 92.2, 88.1, 68.2, 50.6, 41.3, 38.7, 36.5, 30.5, 28.1. <sup>19</sup>F NMR ((CD<sub>3</sub>)<sub>2</sub>SO, 470 MHz): δ (ppm) -60.48. HRMS (ESI): exact mass calculated for [M+H]<sup>+</sup> (C<sub>43</sub>H<sub>40</sub>O<sub>3</sub>N<sub>2</sub>F<sub>3</sub>) requires *m/z* 689.3251, found *m/z* 689.3250. The enantiomeric excess was determined to be 94% by HPLC. [ID column, 254 nm, *n*-hexane: EtOH = 70:30, 1.0 mL/min]: 4.7 min (minor), 7.2 min (major). [α]<sub>D</sub><sup>22</sup> = 198.80 (c = 1.00, CH<sub>2</sub>Cl<sub>2</sub>).

**(1r,3R,5S)-N-(4-((3R,4S)-5-oxo-1,3-diphenyl-4-(*o*-tolylcarbamoyl)hex-1-yn-3-yl)phenyl)adamantane-1-carboxamide (3af)**

Eluent for flash column chromatography: petroleum ether/ethyl acetate = 6:1. Yellow solid, 20.8 mg, 66% yield. mp 105.3-109.9 °C. <sup>1</sup>H NMR ((CD<sub>3</sub>)<sub>2</sub>SO, 500 MHz): δ (ppm) 9.36 (s, 1H), 9.09 (s, 1H), 7.61 (d, *J* = 5.0 Hz, 2H), 7.57 (s, 4H), 7.54-7.53 (m,

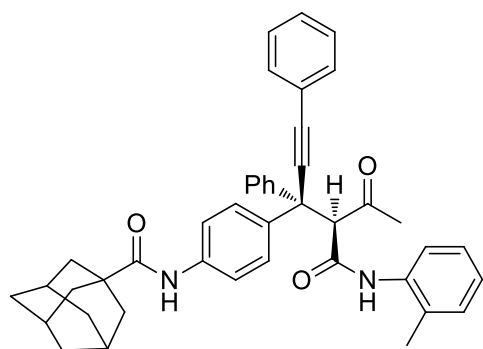

2H), 7.40-7.39 (m, 2H), 7.35-7.32 (m, 2H), 7.22-7.19 (m, 1H), 7.16-7.11 (m, 2H), 7.07-7.00 (m, 3H), 5.31 (s, 1H), 2.20 (s, 3H), 1.96 (s, 6H), 1.85 (s, 6H), 1.66 (s, 6H). <sup>13</sup>C NMR ((CD<sub>3</sub>)<sub>2</sub>SO, 125 MHz): δ (ppm) 201.9, 176.4, 165.2, 144.3, 138.5, 138.0, 136.1, 131.8, 131.7, 130.7, 130.1, 129.1 (2), 128.8, 127.6, 127.1, 126.3, 125.7, 125.0, 123.6, 120.2, 92.6, 87.7, 67.3, 50.3, 41.3, 38.7, 36.4,

30.5, 28.1, 17.9. HRMS (ESI): exact mass calculated for [M+Na]<sup>+</sup> (C<sub>43</sub>H<sub>42</sub>O<sub>3</sub>N<sub>2</sub>Na) requires m/z 657.3088, found m/z 657.3089. The enantiomeric excess was determined to be 70% by HPLC. [ID column, 254 nm, *n*-hexane:EtOH = 70:30, 1.0 mL/min]: 7.3 min (minor), 9.5 min (major). [α]<sub>D</sub><sup>22</sup> = 45.80 (c = 1.00, CH<sub>2</sub>Cl<sub>2</sub>).

**(1*r*,3*R*,5*S*)-*N*-(4-((3*R*,4*S*)-4-((2,4-dimethylphenyl)carbamoyl)-5-oxo-1,3-diphenylhex-1-yn-3-yl)phenyl)adamantane-1-carboxamide (3ag)**

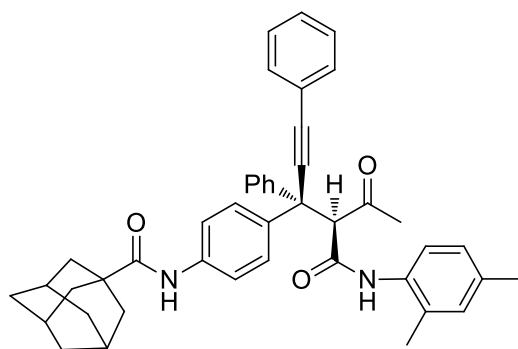

Eluent for flash column chromatography: petroleum ether/ethyl acetate = 6:1. Yellow solid, 26.8 mg, 83% yield. mp 105.1-108.1 °C. <sup>1</sup>H NMR ((CD<sub>3</sub>)<sub>2</sub>SO, 500 MHz): δ (ppm) 9.14 (s, 1H), 9.08 (s, 1H), 7.58-7.56 (m, 4H), 7.54-7.52 (m, 4H), 7.40-7.39 (m, 3H), 7.35-7.32 (m, 2H), 7.22-7.20 (m, 1H), 7.01 (d, *J* = 5.0 Hz, 1H), 6.93 (s, 1H), 6.86 (d, *J* = 10.0 Hz, 1H), 5.18 (s, 1H), 2.20 (s,

3H), 2.18 (s, 3H), 1.98 (s, 3H), 1.90 (s, 3H), 1.85 (s, 6H), 1.67 (s, 6H). <sup>13</sup>C NMR ((CD<sub>3</sub>)<sub>2</sub>SO, 125 MHz): δ (ppm) 202.0, 176.4, 165.1, 144.2, 143.4, 138.5, 138.0, 134.9, 133.5, 131.7, 131.6, 131.2, 131.1, 129.1, 128.8, 127.6, 127.2, 126.8, 124.9, 123.5, 120.1, 92.6, 87.8, 67.4, 50.3, 41.3, 38.7, 36.4, 30.4, 28.1, 20.9, 17.8. HRMS (ESI): exact mass calculated for [M+Na]<sup>+</sup> (C<sub>44</sub>H<sub>44</sub>O<sub>3</sub>N<sub>2</sub>Na) requires m/z 671.3244, found m/z 671.3246. The enantiomeric excess was determined to be 93% by HPLC. [ID column, 254 nm, *n*-hexane: EtOH = 70:30, 1.0 mL/min]: 7.0 min (minor), 10.7 min (major). [α]<sub>D</sub><sup>22</sup> = 64.00 (c = 1.00, CH<sub>2</sub>Cl<sub>2</sub>).

**(1*r*,3*R*,5*S*)-*N*-(4-((3*R*,4*S*)-6-methyl-5-oxo-1,3-diphenyl-4-(phenylcarbamoyl)hept-1-yn-3-yl)phenyl)adamantane-1-carboxamide (3ah)**

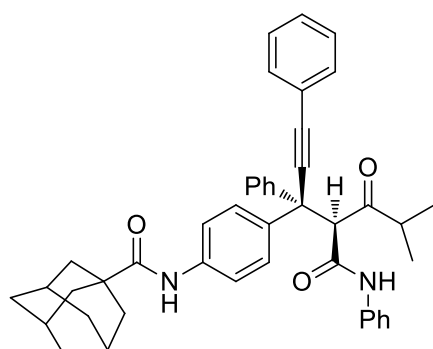

Eluent for flash column chromatography: petroleum ether/ethyl acetate = 8:1. Yellow solid, 26.4 mg, 81% yield. mp 101.5-104.2 °C. <sup>1</sup>H NMR ((CD<sub>3</sub>)<sub>2</sub>SO, 500 MHz): δ (ppm) 9.90 (s, 1H), 9.04 (s, 1H), 7.57-7.55 (m, 8H), 7.44-7.40 (m, 3H), 7.36-7.32 (m, 4H), 7.25-7.20 (m, 3H), 7.03-7.00 (m, 1H), 5.19 (s, 1H), 2.94-2.87 (m,

1H), 1.95 (s, 3H), 1.83 (s, 6H), 1.64 (s, 6H), 0.90 (d,  $J = 5.0$  Hz, 3H), 0.86 (d,  $J = 5.0$  Hz, 3H).  $^{13}\text{C}$  NMR ( $(\text{CD}_3)_2\text{SO}$ , 125 MHz):  $\delta$  (ppm) 207.6, 176.3, 164.8, 143.9, 138.7, 138.4, 138.0, 131.7, 129.2, 129.1, 128.8, 128.7, 127.5, 127.2, 127.1, 124.2, 123.6, 120.1, 119.8, 92.5, 87.9, 66.5, 50.7, 41.3, 38.7, 36.4, 28.1, 19.0, 18.8. HRMS (ESI): exact mass calculated for  $[\text{M}+\text{Na}]^+$  ( $\text{C}_{44}\text{H}_{44}\text{O}_3\text{N}_2\text{Na}$ ) requires  $m/z$  671.3244, found  $m/z$  671.3246. The enantiomeric excess was determined to be 86% by HPLC. [IA column, 254 nm, *n*-hexane: IPA = 70:30, 1.0 mL/min]: 5.6 min (minor), 9.8 min (major).  $[\alpha]_{\text{D}}^{22} = 92.30$  ( $c = 1.00$ ,  $\text{CH}_2\text{Cl}_2$ ).

## D: Large Scale Reaction

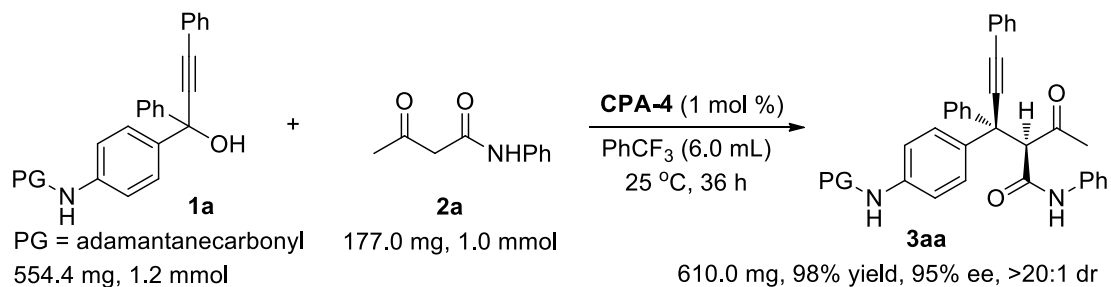

To a solution of PhCF<sub>3</sub> (6.0 mL) were added propargylic alcohol **1a** (554.4 mg, 1.2 mmol), 3-oxo-*N*-phenylbutanamide **2a** (177.0 mg, 1.0 mmol) and **CPA-4** (7.0 mg, 0.01 mmol). The reaction mixture was stirred at room temperature for 36 h and then the solvent was removed under vacuum. The residue was purified by silica gel chromatography to yield the desired product **3aa** as a yellow solid (610.0 mg, 98% yield, 95% ee, >20:1 dr).

## E: Control Experiment

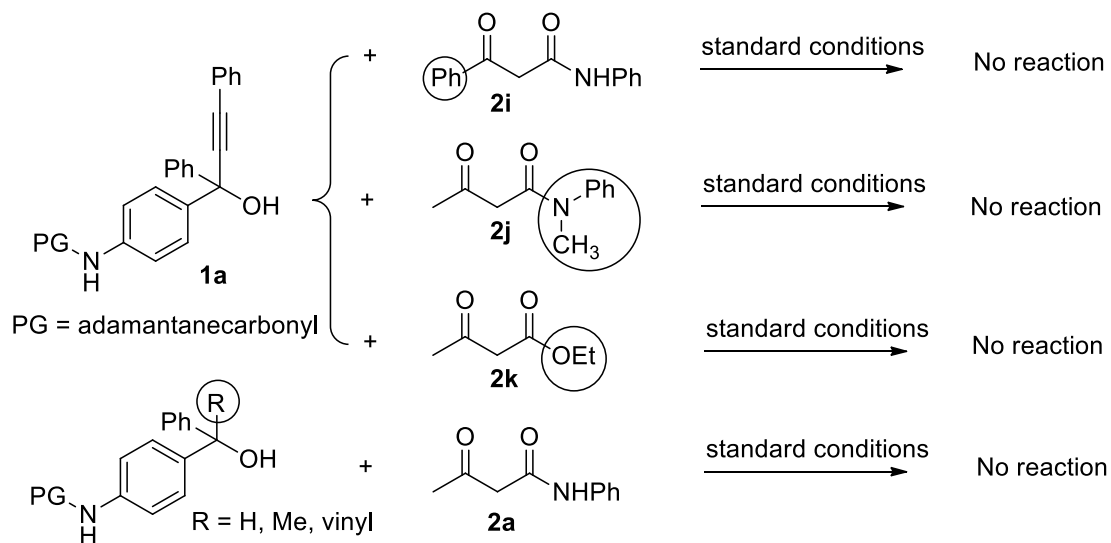

To a solution of  $\text{PhCF}_3$  (0.3 mL) were added substrate **1a** (27.72 mg, 0.06 mmol), nucleophiles **2i-k** and **CPA-4** (0.35 mg, 0.0005 mmol). The reaction mixture was stirred at room temperature for 36 h. No desired product was observed under the optimized conditions.

## F: Synthetic Transformations.

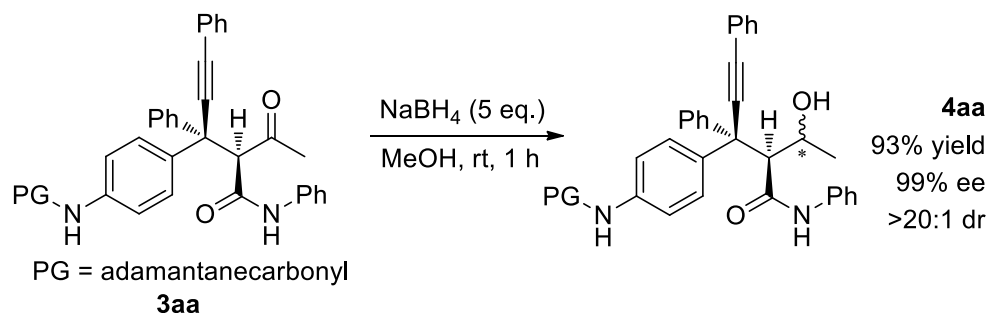

To a solution of **3aa** (31.1 mg, 0.05 mmol) in MeOH (2.5 mL) was added NaBH<sub>4</sub> (9.5 mg, 0.25 mmol) in one portion at 0 °C. It was stirred at room temperature for 1 h. Then a saturated aqueous NH<sub>4</sub>Cl solution (2.5 mL) was added to quench the reaction. The aqueous layer was extracted with ethyl acetate (3×5 mL). The combined organic layers were washed with brine (5 mL), dried over anhydrous Na<sub>2</sub>SO<sub>4</sub>, filtered, and concentrated. The residue was purified by silica gel chromatography (eluent: hexanes/ethyl acetate = 3:1) to afford compound **4aa** (29.0 mg, 93% yield, 99% ee, >20:1 dr).

### (1*r*,3*R*,5*S*)-*N*-(4-((3*R*,4*S*)-5-hydroxy-1,3-diphenyl-4-(phenylcarbamoyl)hex-1-yn-3-yl)phenyl)adamantane-1-carboxamide (**4aa**)

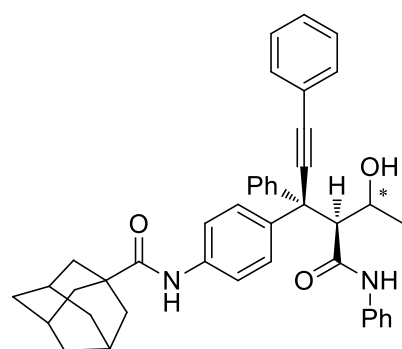

Eluent for flash column chromatography: petroleum ether/ethyl acetate =3:1. White solid, 29.0 mg, 93% yield. mp 165.5-167.1 °C. <sup>1</sup>H NMR (CDCl<sub>3</sub>, 500 MHz): δ (ppm) 8.59 (s, 1H), 7.67-7.65 (m, 3H), 7.63-7.61 (m, 3H), 7.49 (d, *J* = 10.0 Hz, 2H), 7.43-7.43 (m, 2H), 7.42-7.41 (m, 1H), 7.32-7.26 (m, 5H), 7.22-7.21 (m, 1H), 7.20-7.18 (m, 2H), 7.05-7.01 (m, 1H), 4.23-4.18 (m, 1H), 3.97 (d, *J* = 10.0 Hz, 1H), 2.56 (d, *J* = 5.0 Hz, 1H), 2.05 (s, 3H),

1.89 (s, 6H), 1.75-1.66 (m, 6H), 1.48 (d, *J* = 10.0 Hz, 3H). <sup>13</sup>C NMR (CDCl<sub>3</sub>, 125 MHz): δ (ppm) 176.2, 169.4, 143.1, 139.3, 137.3, 137.1, 131.7, 129.3, 129.0, 128.9, 128.8, 127.4, 126.7, 124.6, 121.8, 120.3, 120.0, 91.0, 90.9, 68.2, 62.4, 50.4, 41.5, 39.2, 36.4, 28.1, 21.1. HRMS (ESI): exact mass calculated for [M+H]<sup>+</sup> (C<sub>42</sub>H<sub>43</sub>O<sub>3</sub>N<sub>2</sub>) requires *m/z* 623.3268, found *m/z* 623.3270. The enantiomeric excess was determined to be 99% by HPLC. [IA column, 254 nm, *n*-hexane:EtOH = 75:25, 1.0 mL/min]: 8.7 min (major), 15.3 min (minor). [α]<sub>D</sub><sup>22</sup> = 13.88 (c = 1.00, CH<sub>2</sub>Cl<sub>2</sub>).



**(1*r*,3*R*,5*S*)-*N*-(4-((3*R*,4*S*)-5-hydroxy-1,3-diphenyl-4-(phenylcarbamoyl)hex-1-yn-3-yl)phenyl)adamantane-1-carboxamide (4aa)**

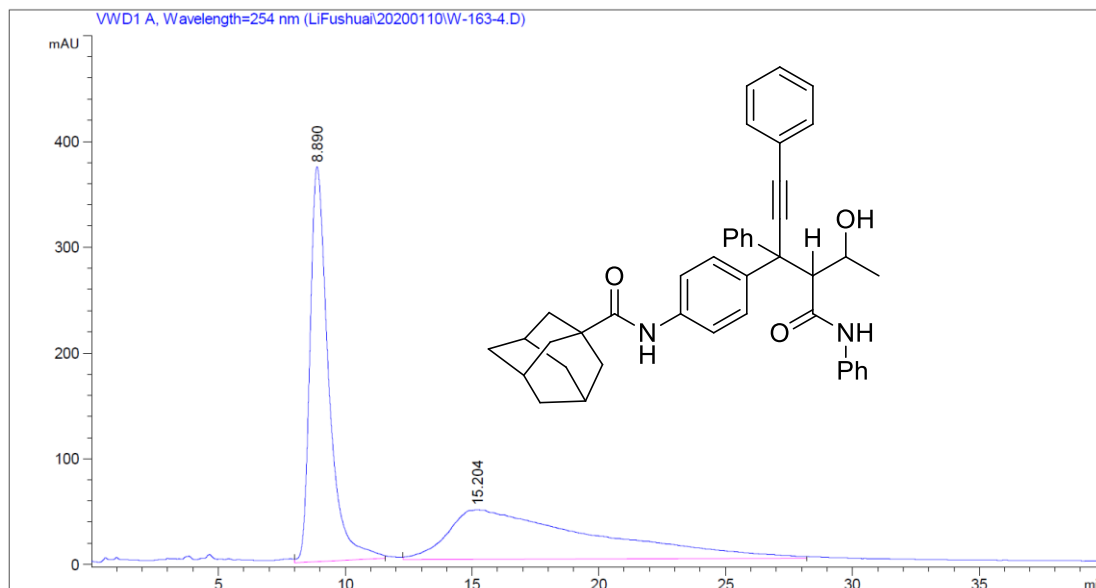

| # | Time   | Area    | Height | Width  | Symmetry | Area % |
|---|--------|---------|--------|--------|----------|--------|
| 1 | 8.89   | 19005.3 | 373.2  | 0.8487 | 0.588    | 50.488 |
| 2 | 15.204 | 18638   | 47     | 6.6052 | 0.257    | 49.512 |

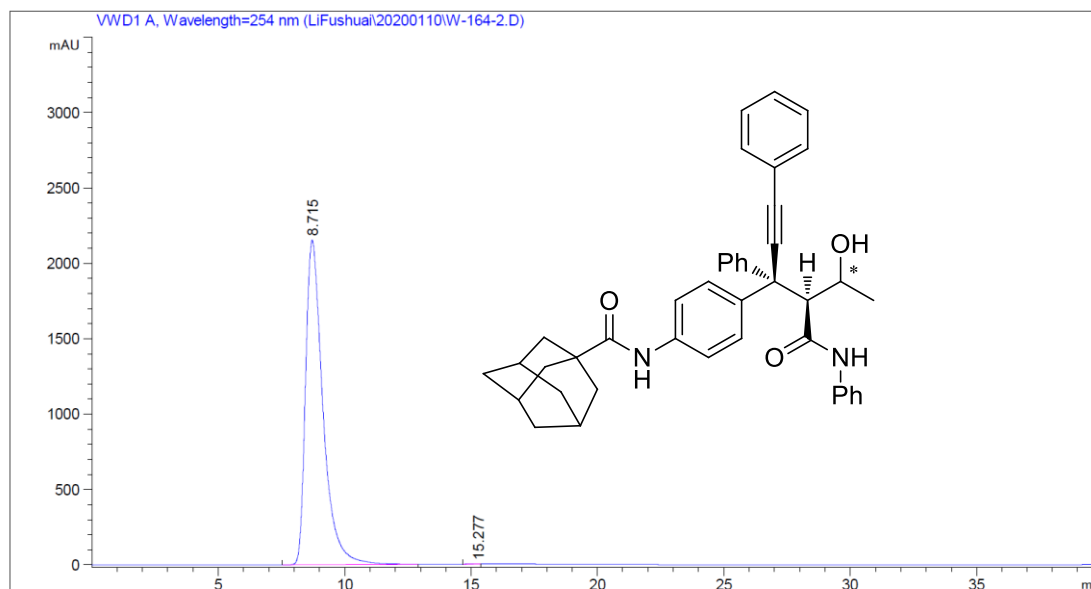

| # | Time   | Area     | Height | Width  | Symmetry | Area % |
|---|--------|----------|--------|--------|----------|--------|
| 1 | 8.715  | 102784.8 | 2153   | 0.737  | 0.557    | 99.982 |
| 2 | 15.277 | 18.8     | 3.3E-1 | 0.7199 | 0        | 0.018  |

**(1*r*,3*R*,5*S*)-N-(4-((3*R*,4*S*)-5-hydroxy-1,3-diphenyl-4-(phenylcarbamoyl)hex-1-yn-3-yl)phenyl)adamantane-1-carboxamide (4aa)**

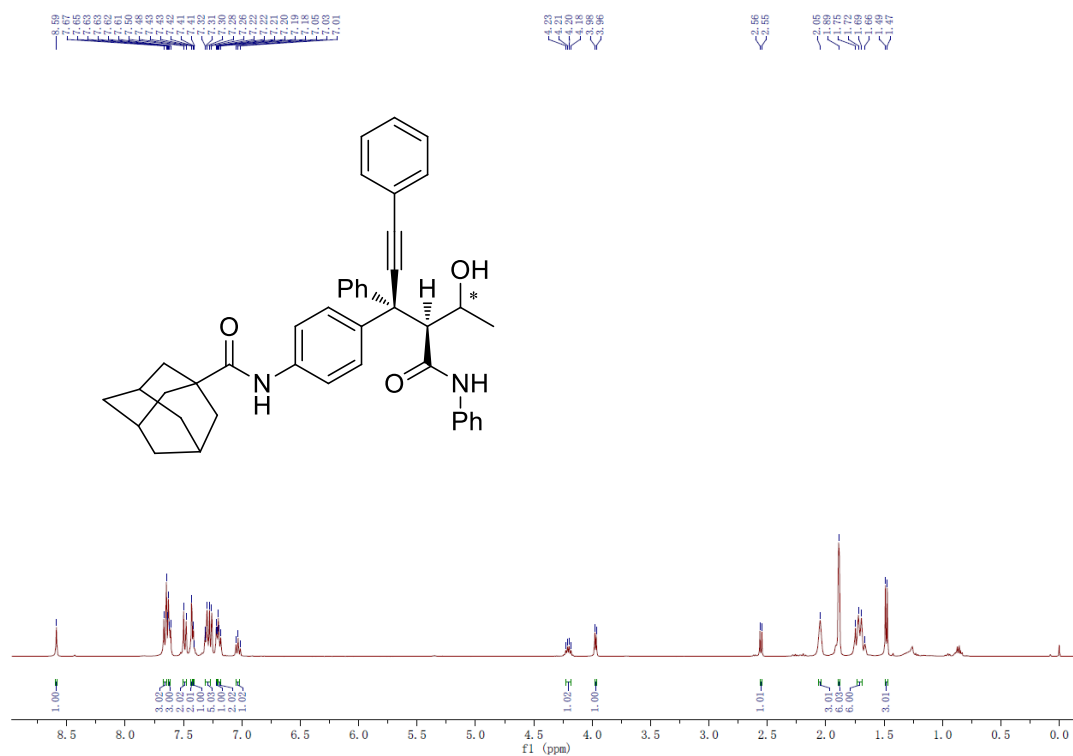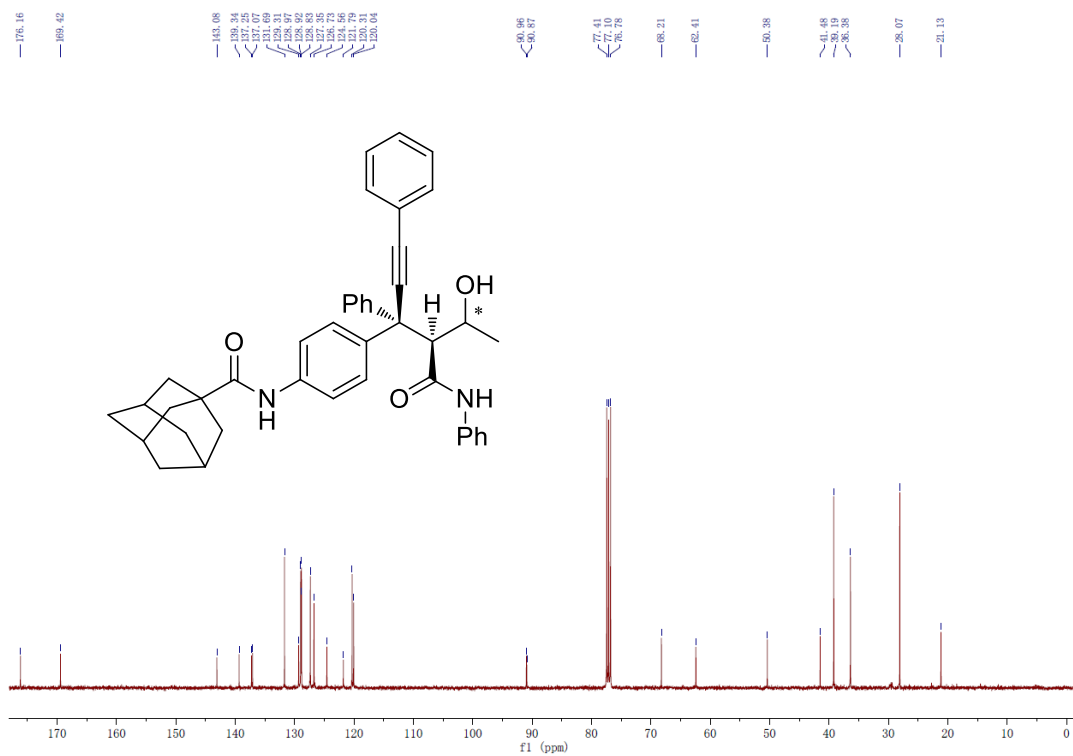

## G: ESI-MS Studies

a) ESI(+)-MS spectra for the reaction of catalyst **CPA-4** and propargylic alcohol **1a** for 2 h; b) ESI(+)-MS spectra for the 1,6-conjugate addition of propargylic alcohol **1a** and 3-oxo-*N*-phenylbutanamide **2a** catalyzed by catalyst **CPA-4** for 12 h. Other unidentified ions are likely to correspond to either impurities or side-reaction products.

a)

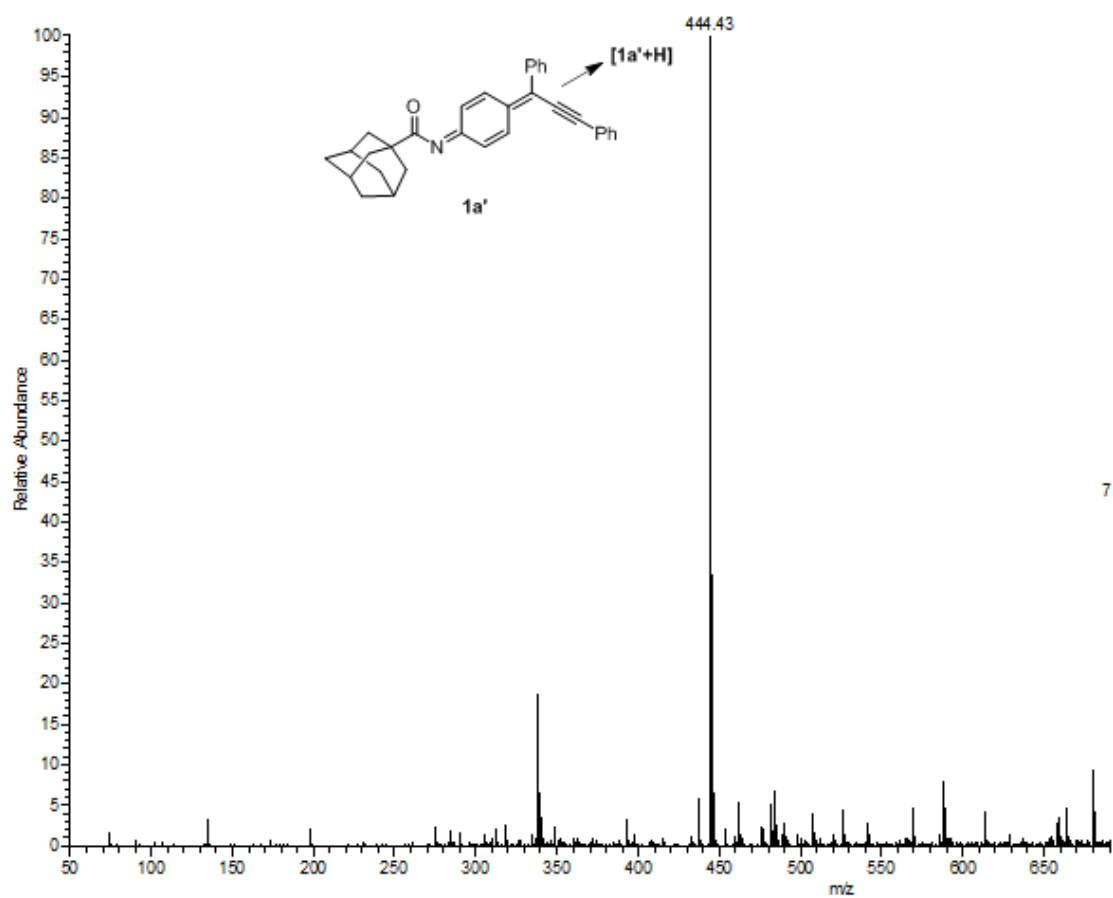

7

b)

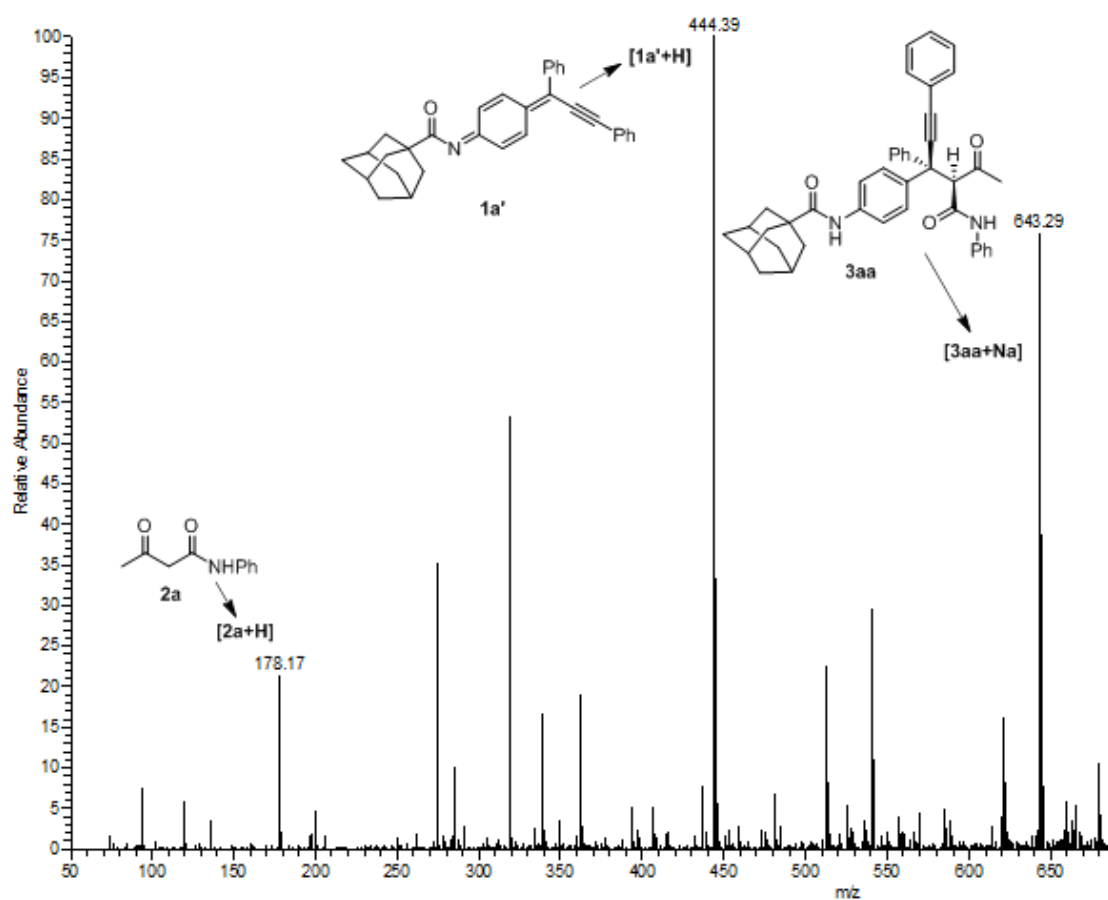

## H: Possible Transition State

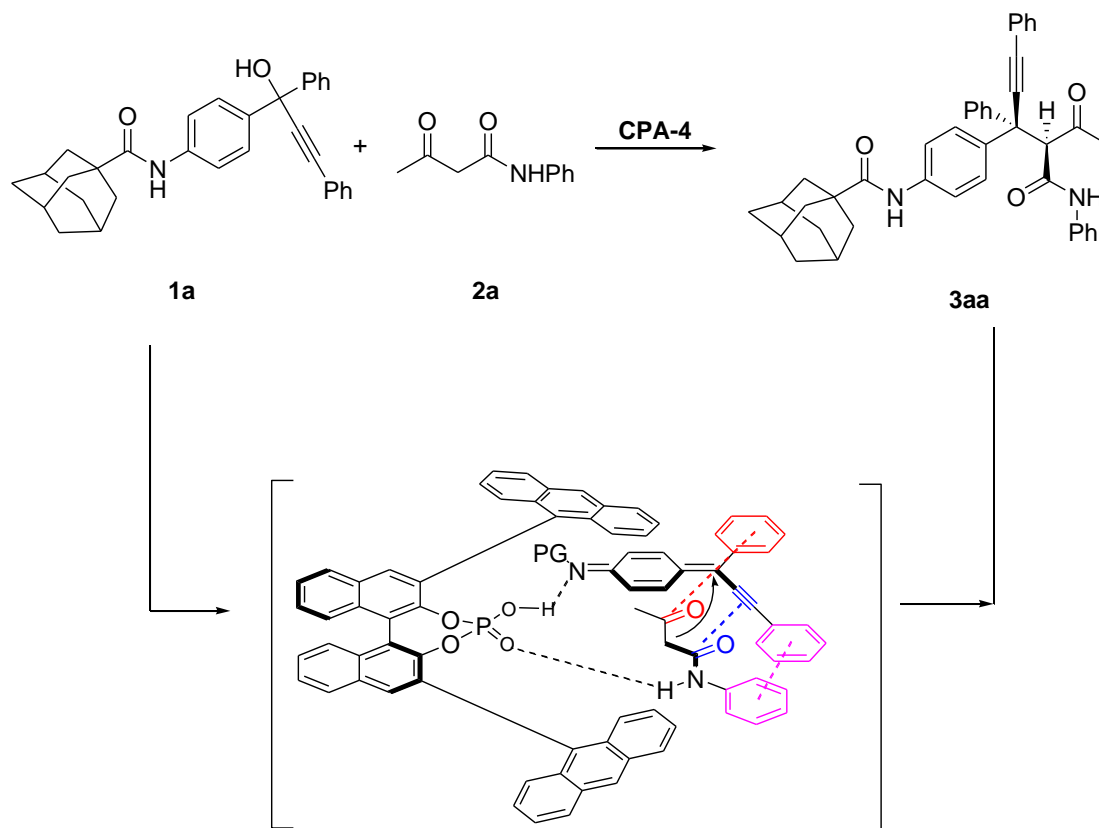

## I: HPLC Analysis

### (1*r*,3*R*,5*S*)-*N*-(4-((3*R*,4*S*)-5-oxo-1,3-diphenyl-4-(phenylcarbamoyl)hex-1-yn-3-yl)phenyl)adamantane-1-carboxamide (3aa)

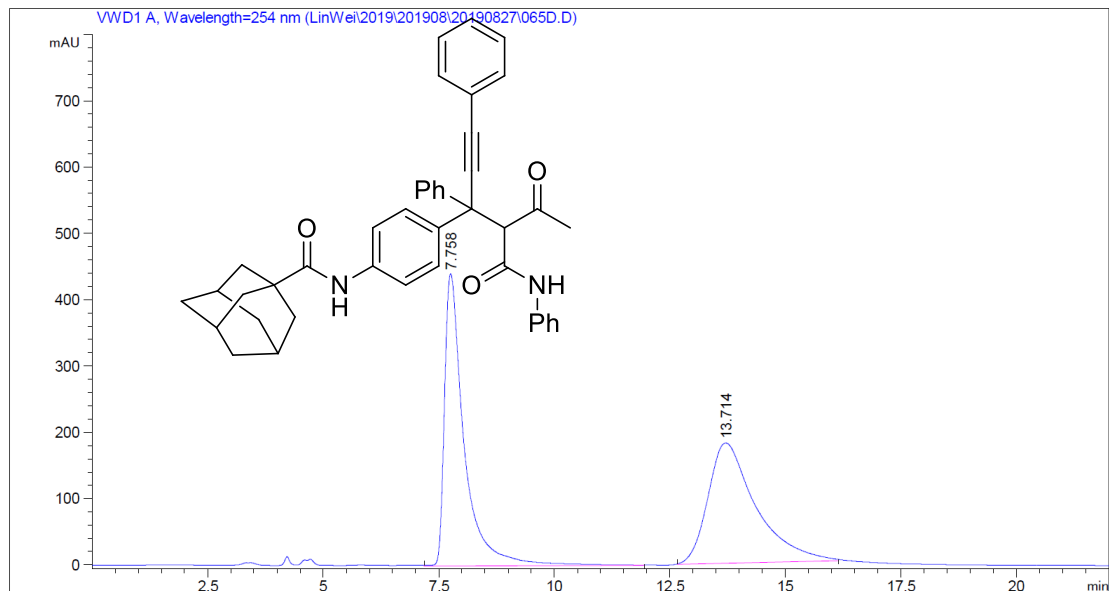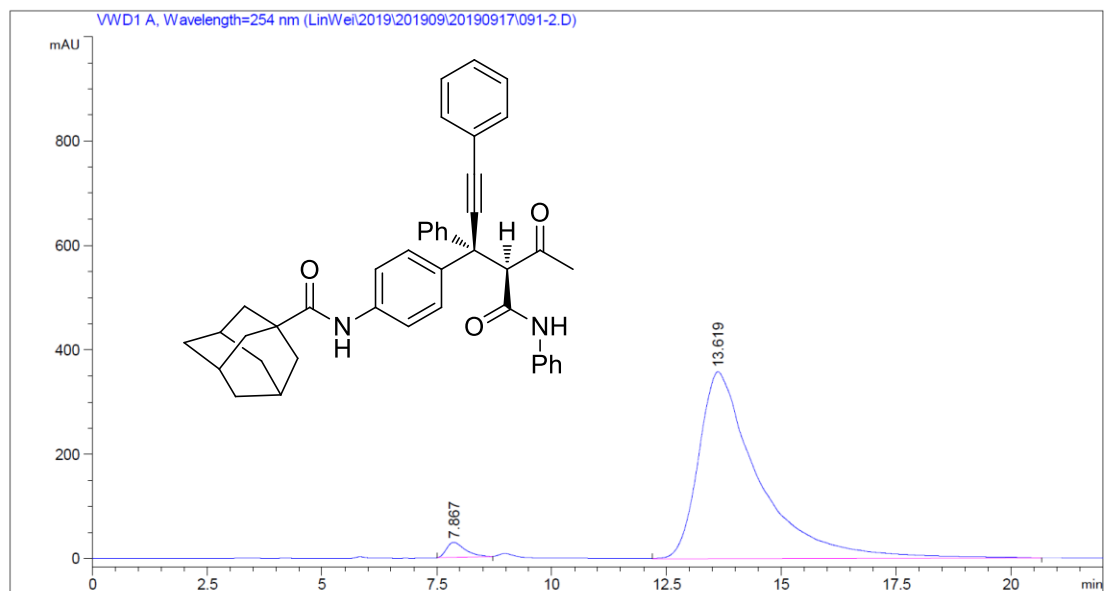

| # | Time   | Area    | Height | Width  | Symmetry | Area % |
|---|--------|---------|--------|--------|----------|--------|
| 1 | 7.867  | 821.9   | 28.9   | 0.4734 | 0.589    | 2.457  |
| 2 | 13.619 | 32626.3 | 358.3  | 1.5175 | 0.454    | 97.543 |

***N*-4-((3*R*,4*S*)-5-oxo-1,3-diphenyl-4-(phenylcarbamoyl)hex-1-yn-3-yl)phenyl)-3,5-bis(trifluoromethyl)benzamide (3ba)**

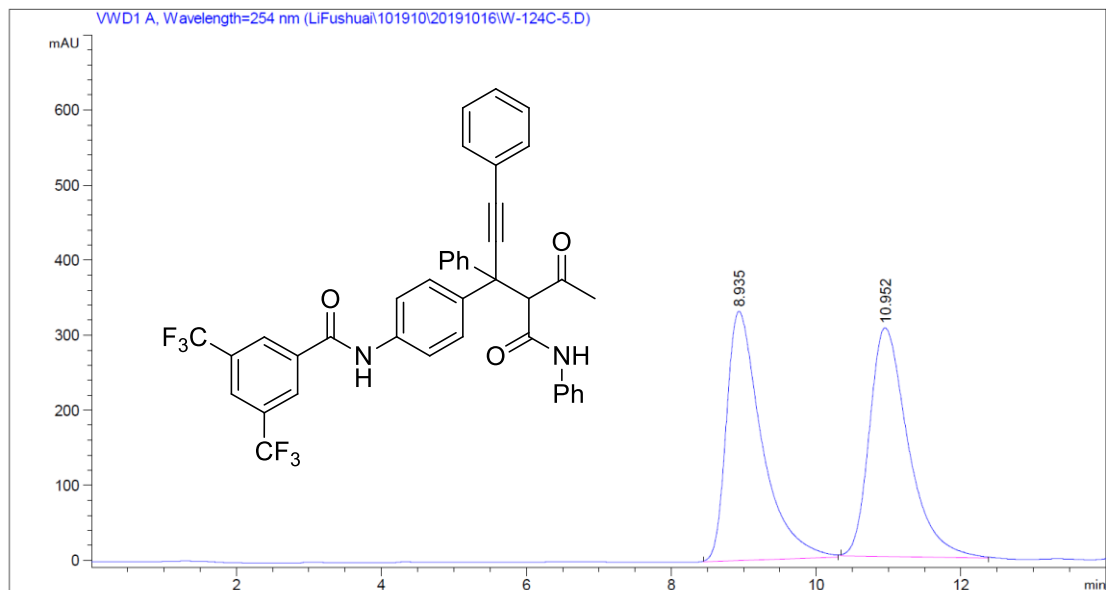

| # | Time   | Area  | Height | Width  | Symmetry | Area % |
|---|--------|-------|--------|--------|----------|--------|
| 1 | 8.935  | 11296 | 332.3  | 0.5666 | 0.526    | 50.022 |
| 2 | 10.952 | 11286 | 304.6  | 0.6175 | 0.647    | 49.978 |

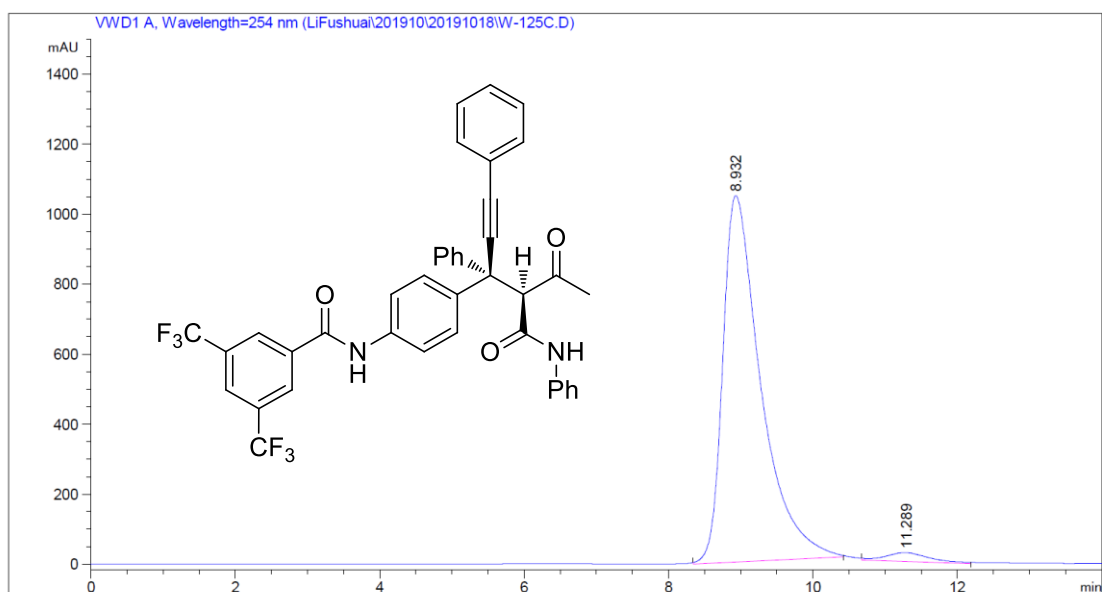

| # | Time   | Area    | Height | Width  | Symmetry | Area % |
|---|--------|---------|--------|--------|----------|--------|
| 1 | 8.932  | 38265.6 | 1046.6 | 0.6094 | 0.506    | 97.177 |
| 2 | 11.289 | 1111.8  | 25.4   | 0.7305 | 0.736    | 2.823  |

**(2*S*,3*R*)-2-acetyl-*N*,3,5-triphenyl-3-(4-pivalamidophenyl)pent-4-ynamide (3ca)**

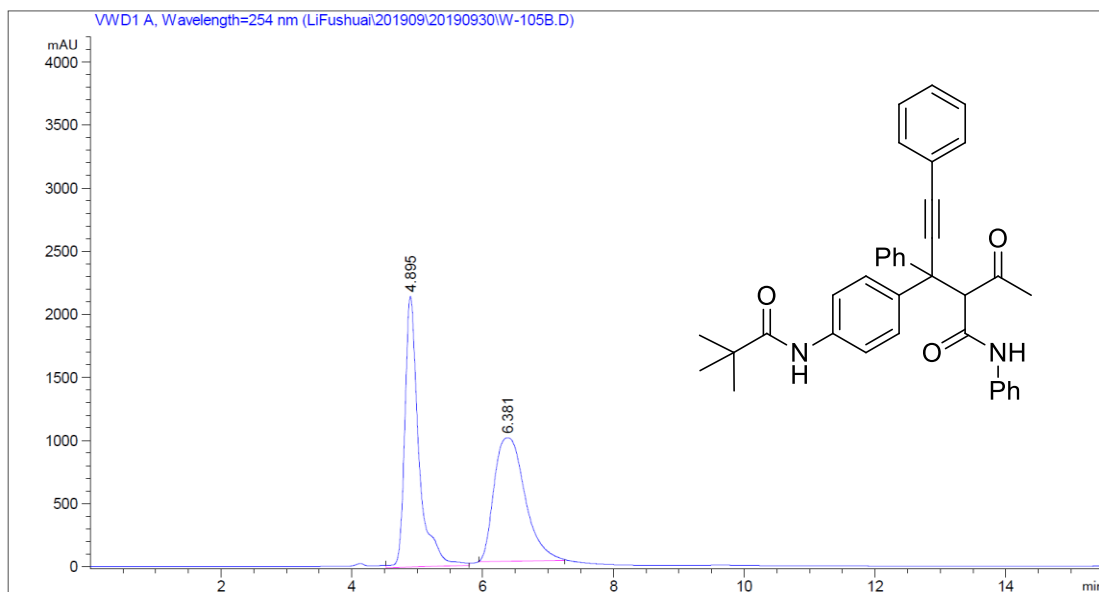

| # | Time  | Area    | Height | Width  | Symmetry | Area % |
|---|-------|---------|--------|--------|----------|--------|
| 1 | 4.895 | 32075.7 | 2145.1 | 0.2492 | 0.619    | 49.984 |
| 2 | 6.381 | 32096.3 | 978.6  | 0.5466 | 0.745    | 50.016 |

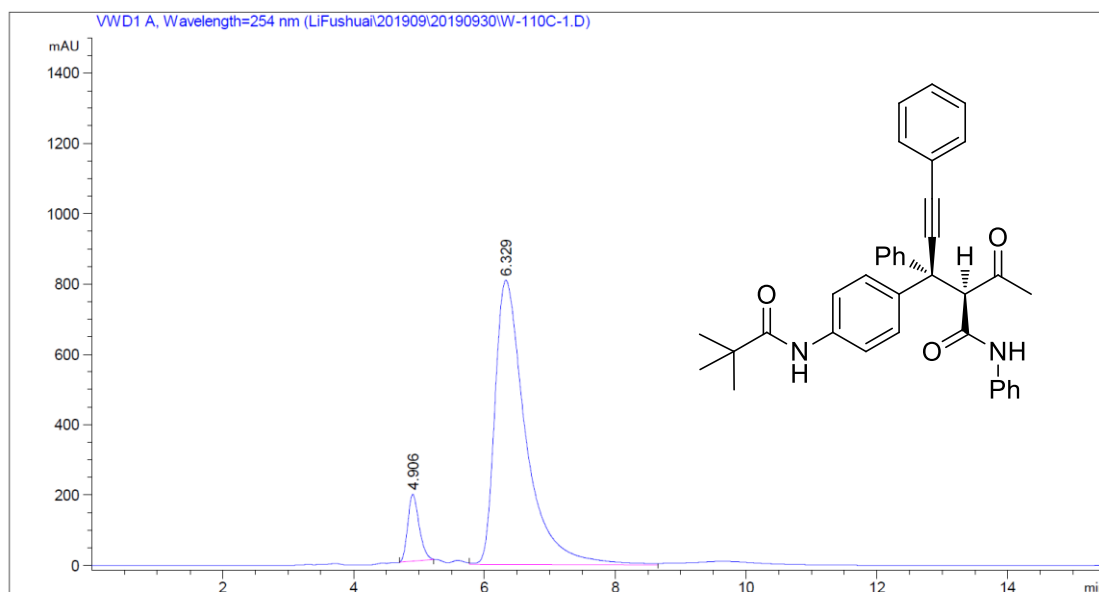

| # | Time  | Area    | Height | Width  | Symmetry | Area % |
|---|-------|---------|--------|--------|----------|--------|
| 1 | 4.906 | 2297.8  | 190.4  | 0.2011 | 0.758    | 7.973  |
| 2 | 6.329 | 26521.6 | 808.3  | 0.5469 | 0.52     | 92.027 |



**(1*r*,3*R*,5*S*)-*N*-(4-((3*R*,4*S*)-1-(4-fluorophenyl)-5-oxo-3-phenyl-4-(phenylcarbamoyl)hex-1-yn-3-yl)phenyl)adamantane-1-carboxamide (3ea)**

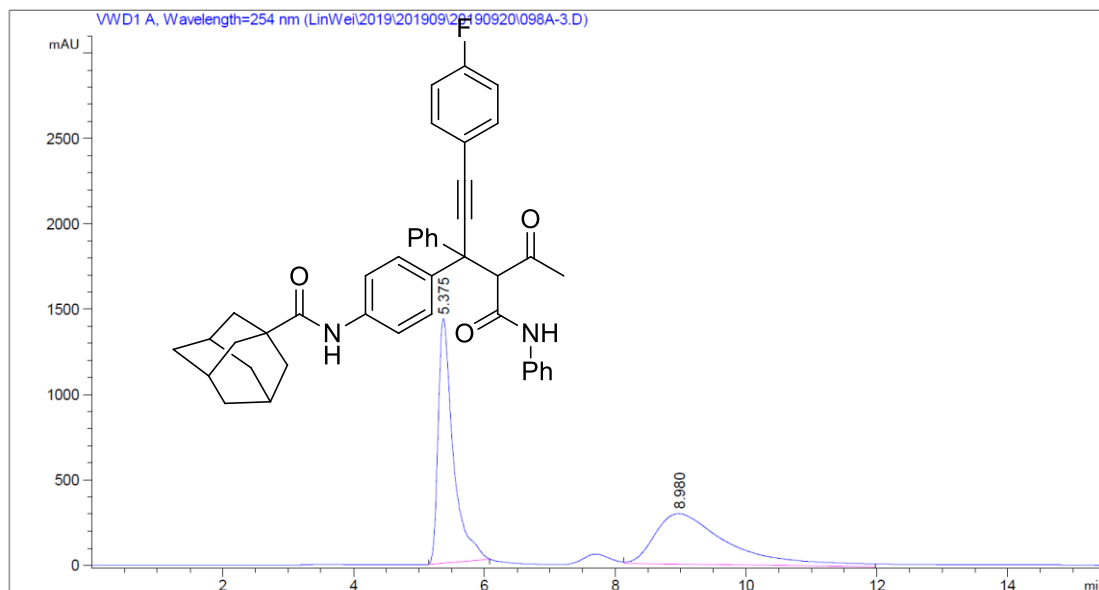

| # | Time  | Area    | Height | Width  | Symmetry | Area % |
|---|-------|---------|--------|--------|----------|--------|
| 1 | 5.375 | 22908.5 | 1431.4 | 0.2667 | 0.511    | 49.913 |
| 2 | 8.98  | 22987.9 | 296.2  | 1.2935 | 0.477    | 50.087 |

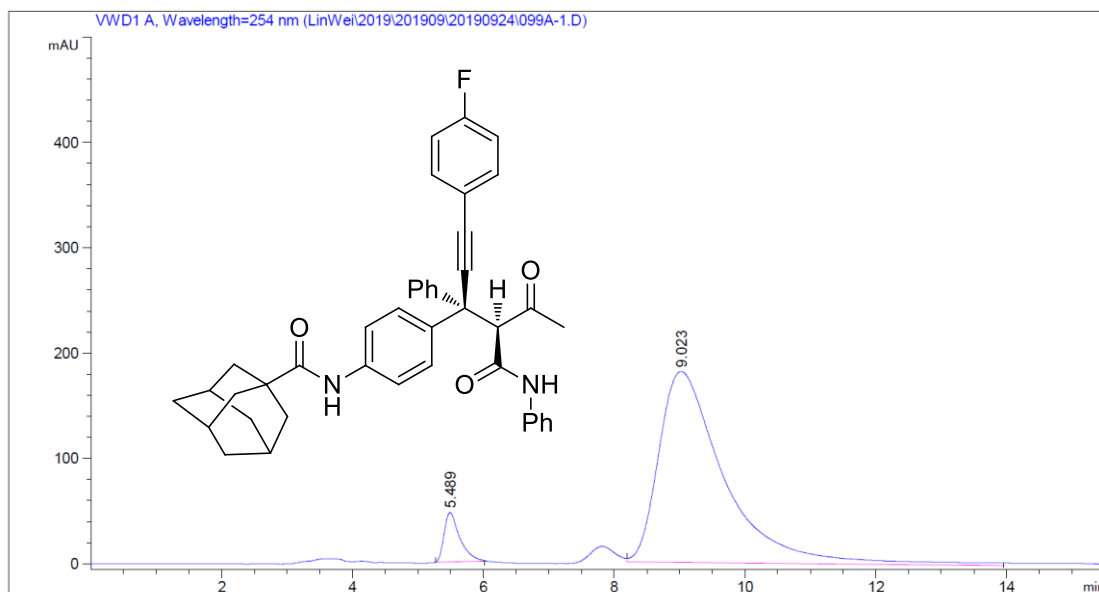

| # | Time  | Area    | Height | Width  | Symmetry | Area % |
|---|-------|---------|--------|--------|----------|--------|
| 1 | 5.489 | 784.9   | 47.2   | 0.2774 | 0.58     | 5.801  |
| 2 | 9.023 | 12744.1 | 181.3  | 1.1715 | 0.489    | 94.199 |

**(1*r*,3*R*,5*S*)-*N*-(4-((3*R*,4*S*)-1-(4-chlorophenyl)-5-oxo-3-phenyl-4-(phenylcarbamoyl)hex-1-yn-3-yl)phenyl)adamantane-1-carboxamide (3fa)**

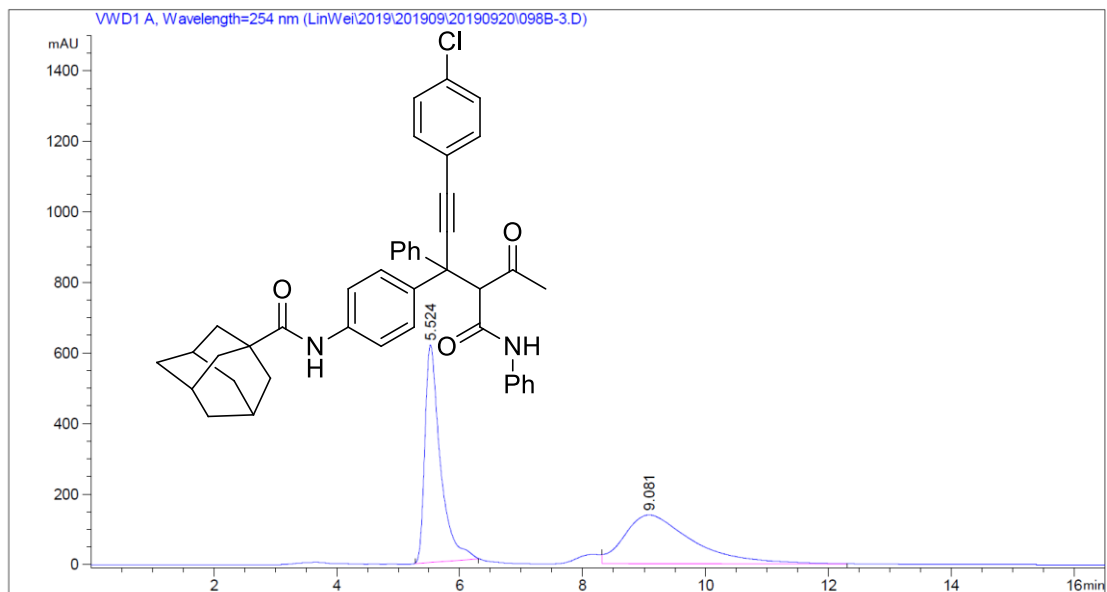

| # | Time  | Area    | Height | Width  | Symmetry | Area % |
|---|-------|---------|--------|--------|----------|--------|
| 1 | 5.524 | 10763   | 616.2  | 0.2911 | 0.533    | 50.153 |
| 2 | 9.081 | 10697.3 | 137.9  | 1.2933 | 0.545    | 49.847 |

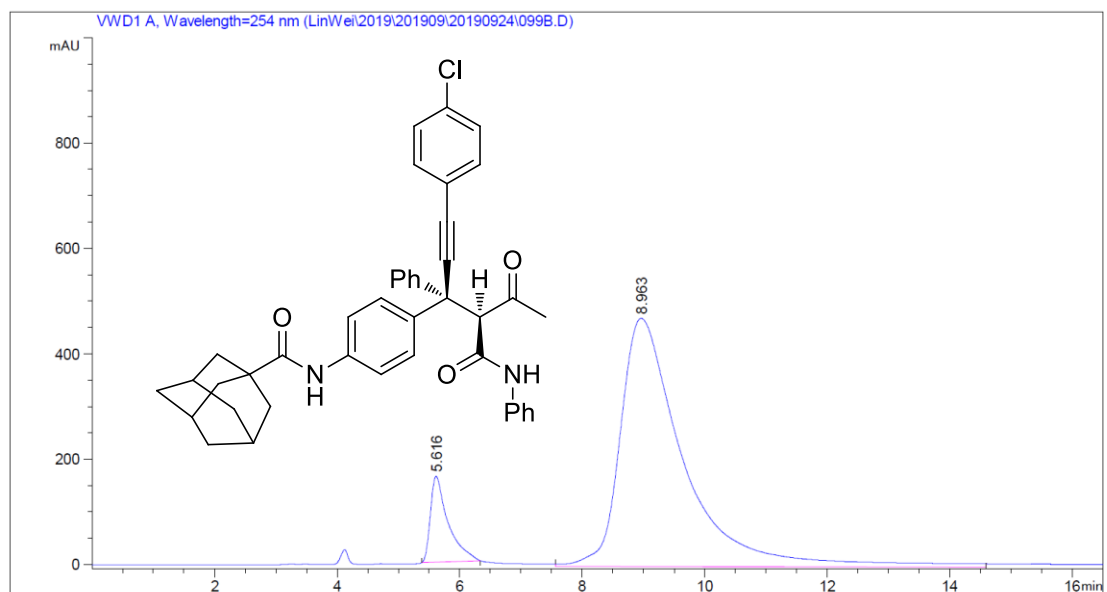

| # | Time  | Area    | Height | Width  | Symmetry | Area % |
|---|-------|---------|--------|--------|----------|--------|
| 1 | 5.616 | 3289.8  | 163.1  | 0.3362 | 0.457    | 8.846  |
| 2 | 8.963 | 33901.5 | 470.5  | 1.2009 | 0.475    | 91.154 |

**(1*r*,3*R*,5*S*)-*N*-(4-((3*R*,4*S*)-1-(4-bromophenyl)-5-oxo-3-phenyl-4-(phenylcarbamoyl)hex-1-yn-3-yl)phenyl)adamantane-1-carboxamide (3ga)**

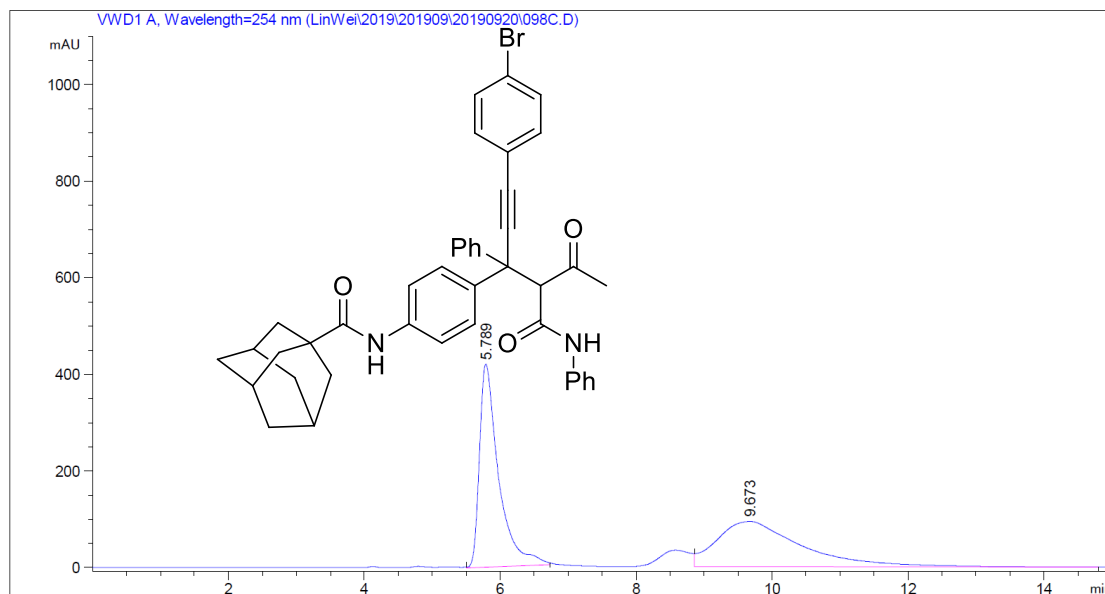

| # | Time  | Area   | Height | Width  | Symmetry | Area % |
|---|-------|--------|--------|--------|----------|--------|
| 1 | 5.789 | 8246.4 | 420.3  | 0.327  | 0.484    | 50.017 |
| 2 | 9.673 | 8240.8 | 93.8   | 1.2473 | 0.573    | 49.983 |

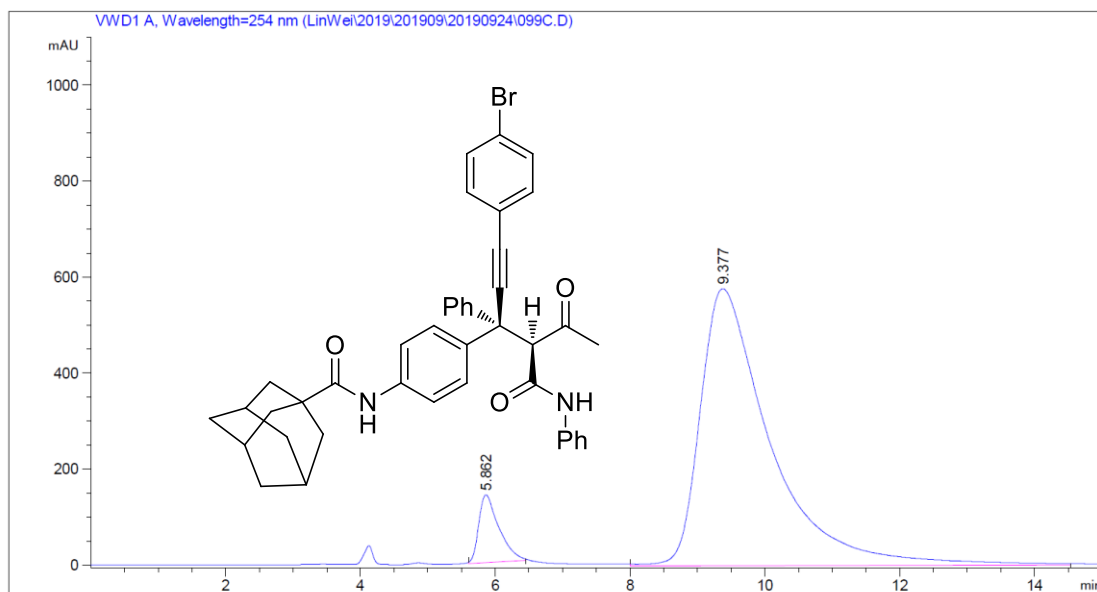

| # | Time  | Area    | Height | Width  | Symmetry | Area % |
|---|-------|---------|--------|--------|----------|--------|
| 1 | 5.862 | 2944.8  | 141.3  | 0.3472 | 0.534    | 6.612  |
| 2 | 9.377 | 41589.7 | 577    | 1.2013 | 0.462    | 93.388 |

**(1*r*,3*R*,5*S*)-*N*-(4-((3*R*,4*S*)-1-(4-methoxyphenyl)-5-oxo-3-phenyl-4-(phenylcarbamoyl)hex-1-yn-3-yl)phenyl)adamantane-1-carboxamide (3ha)**

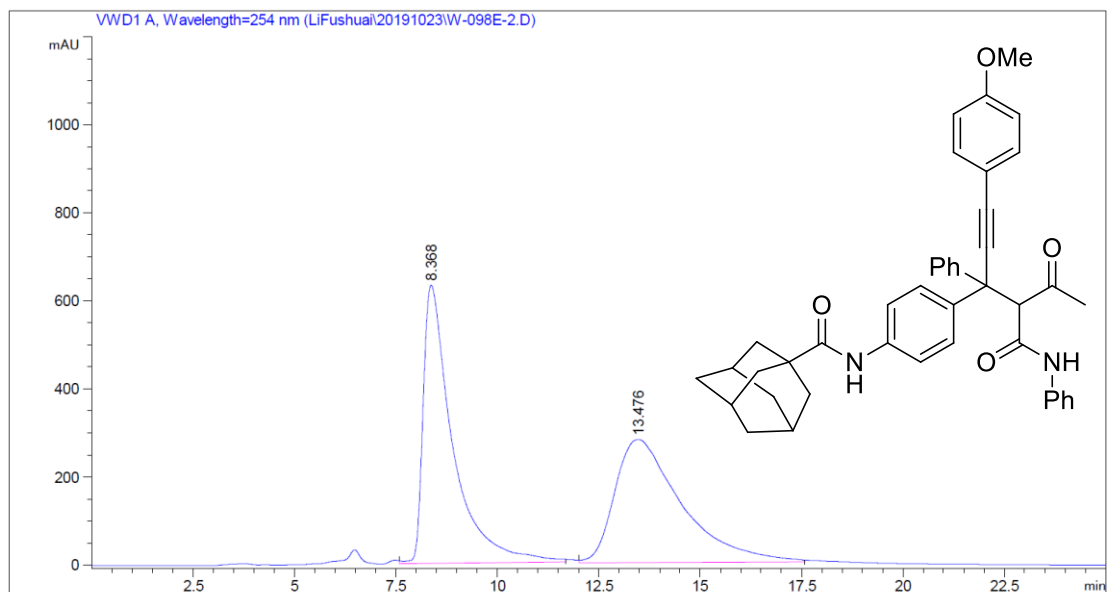

| # | Time   | Area    | Height | Width  | Symmetry | Area % |
|---|--------|---------|--------|--------|----------|--------|
| 1 | 8.368  | 31941.8 | 631.9  | 0.8425 | 0.358    | 50.100 |
| 2 | 13.476 | 31814.8 | 279.6  | 1.8962 | 0.531    | 49.900 |

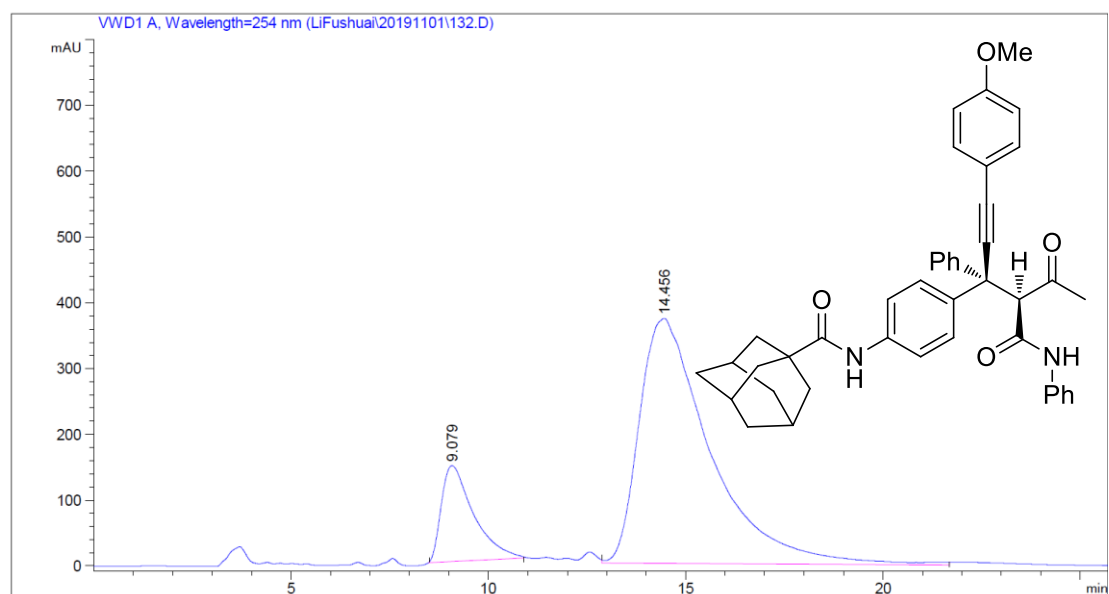

| # | Time   | Area    | Height | Width  | Symmetry | Area % |
|---|--------|---------|--------|--------|----------|--------|
| 1 | 9.079  | 8249.8  | 145.6  | 0.9443 | 0.479    | 15.045 |
| 2 | 14.456 | 46584.5 | 372    | 2.087  | 0.515    | 84.955 |

**(1*r*,3*R*,5*S*)-*N*-(4-((3*R*,4*S*)-1-(3-fluorophenyl)-5-oxo-3-phenyl-4-(phenylcarbamoyl)hex-1-yn-3-yl)phenyl)adamantane-1-carboxamide (3ia)**

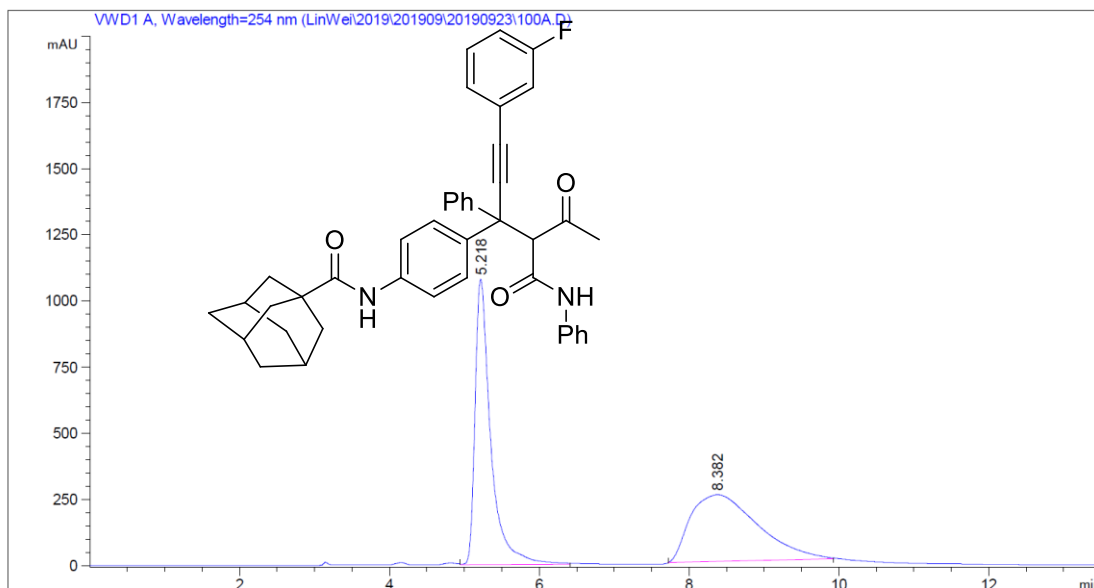

| # | Time  | Area    | Height | Width  | Symmetry | Area % |
|---|-------|---------|--------|--------|----------|--------|
| 1 | 5.218 | 15711.8 | 1079.3 | 0.2426 | 0.525    | 49.968 |
| 2 | 8.382 | 15731.7 | 251.2  | 1.0438 | 0.649    | 50.032 |

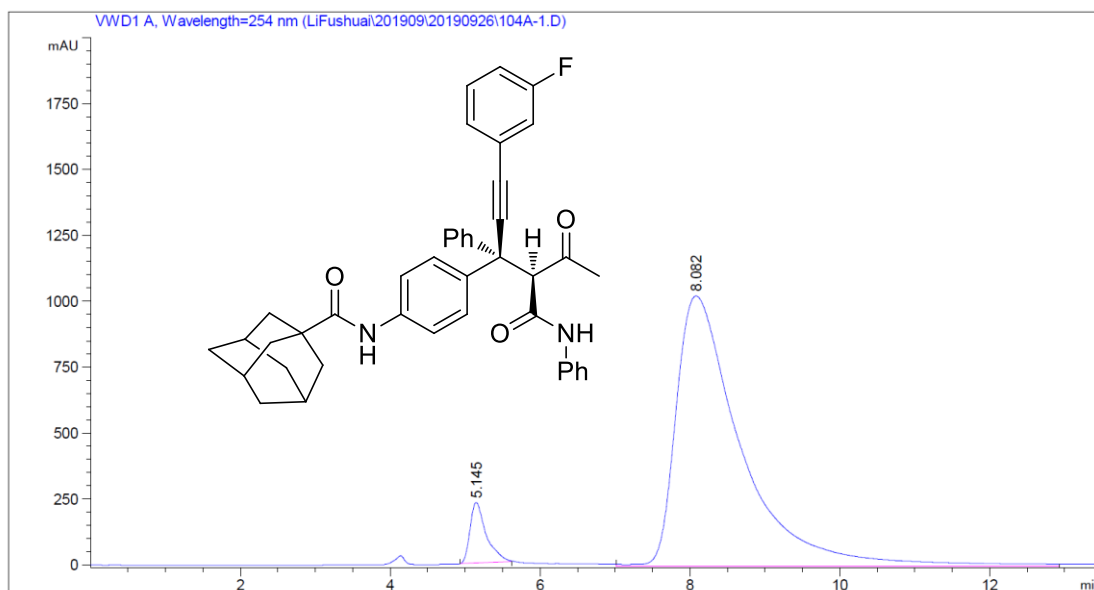

| # | Time  | Area    | Height | Width  | Symmetry | Area % |
|---|-------|---------|--------|--------|----------|--------|
| 1 | 5.145 | 3435.5  | 229    | 0.2501 | 0.579    | 5.199  |
| 2 | 8.082 | 62641.4 | 1026.4 | 1.0172 | 0.424    | 94.801 |

**(1*r*,3*R*,5*S*)-*N*-(4-((3*R*,4*S*)-1-(3-bromophenyl)-5-oxo-3-phenyl-4-(phenylcarbamoyl)hex-1-yn-3-yl)phenyl)adamantane-1-carboxamide (3ja)**

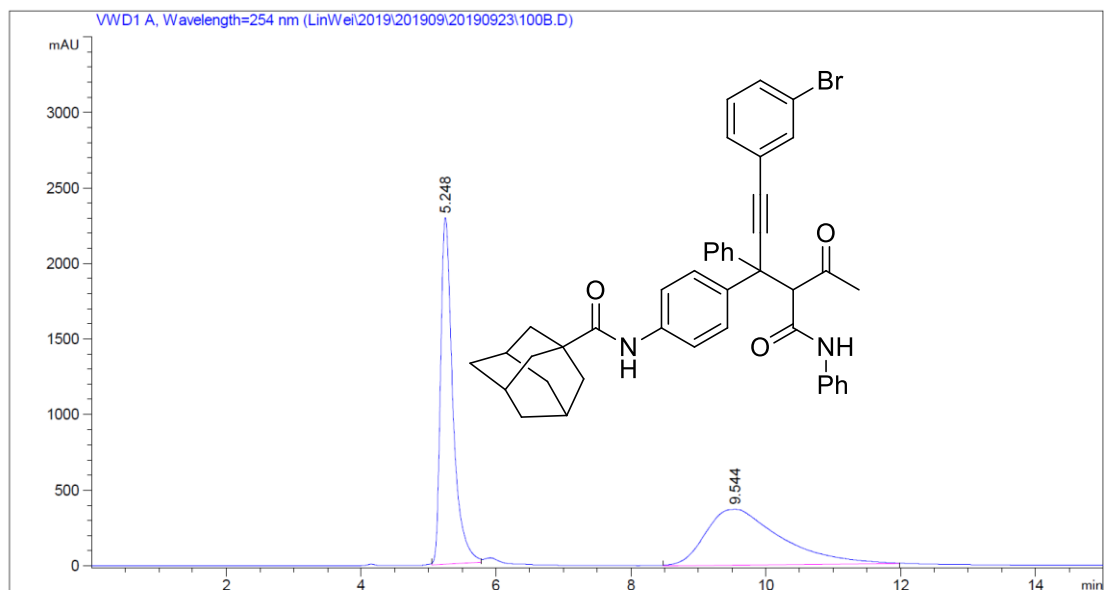

| # | Time  | Area    | Height | Width  | Symmetry | Area % |
|---|-------|---------|--------|--------|----------|--------|
| 1 | 5.248 | 28732.2 | 2293.5 | 0.2088 | 0.599    | 49.956 |
| 2 | 9.544 | 28782.5 | 370.2  | 1.2959 | 0.619    | 50.044 |

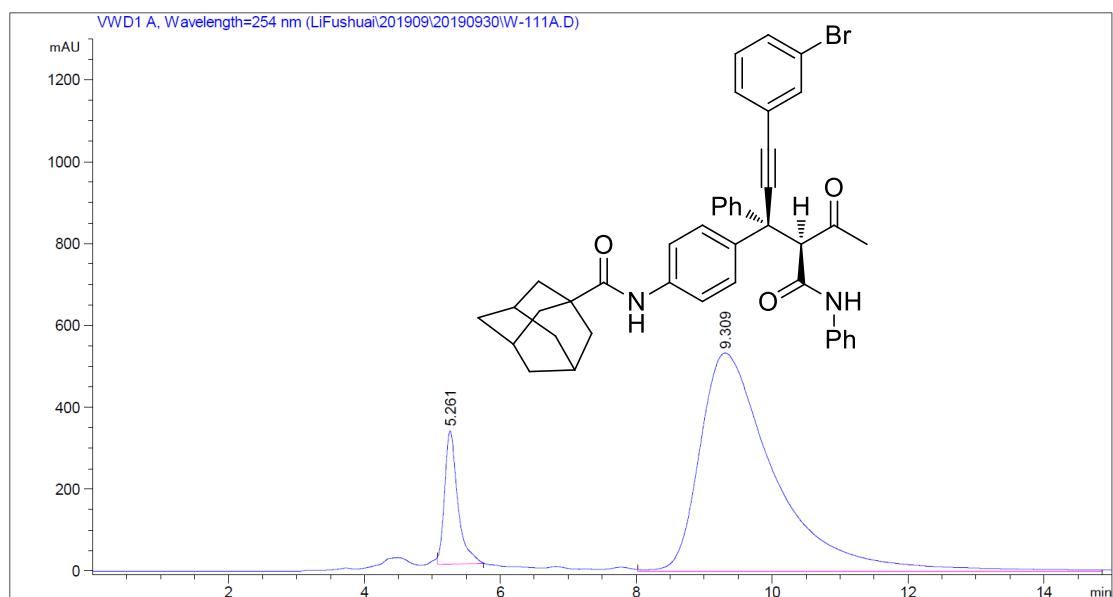

| # | Time  | Area    | Height | Width  | Symmetry | Area % |
|---|-------|---------|--------|--------|----------|--------|
| 1 | 5.261 | 4382    | 324.7  | 0.2249 | 0.677    | 9.708  |
| 2 | 9.309 | 40757.1 | 533.4  | 1.2736 | 0.493    | 90.292 |

**(1*r*,3*R*,5*S*)-*N*-(4-((3*R*,4*S*)-5-oxo-3-phenyl-4-(phenylcarbamoyl)-1-(*m*-tolyl)hex-1-yn-3-yl)phenyl)adamantane-1-carboxamide (3ka)**

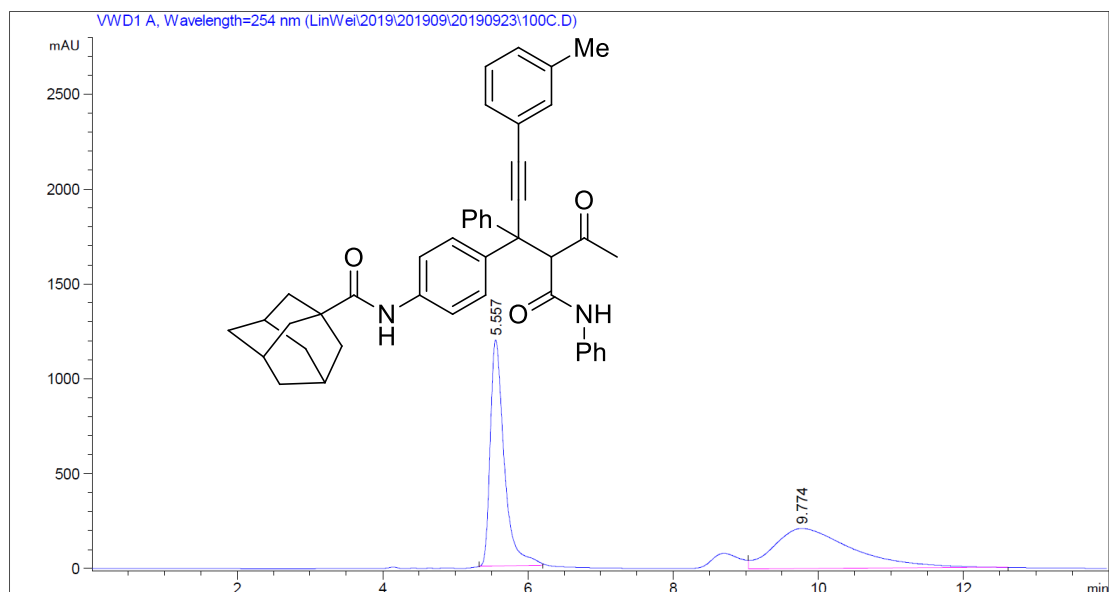

| # | Time  | Area    | Height | Width  | Symmetry | Area % |
|---|-------|---------|--------|--------|----------|--------|
| 1 | 5.557 | 15949.6 | 1191.6 | 0.2231 | 0.598    | 50.061 |
| 2 | 9.774 | 15910.8 | 211.7  | 1.2528 | 0.543    | 49.939 |

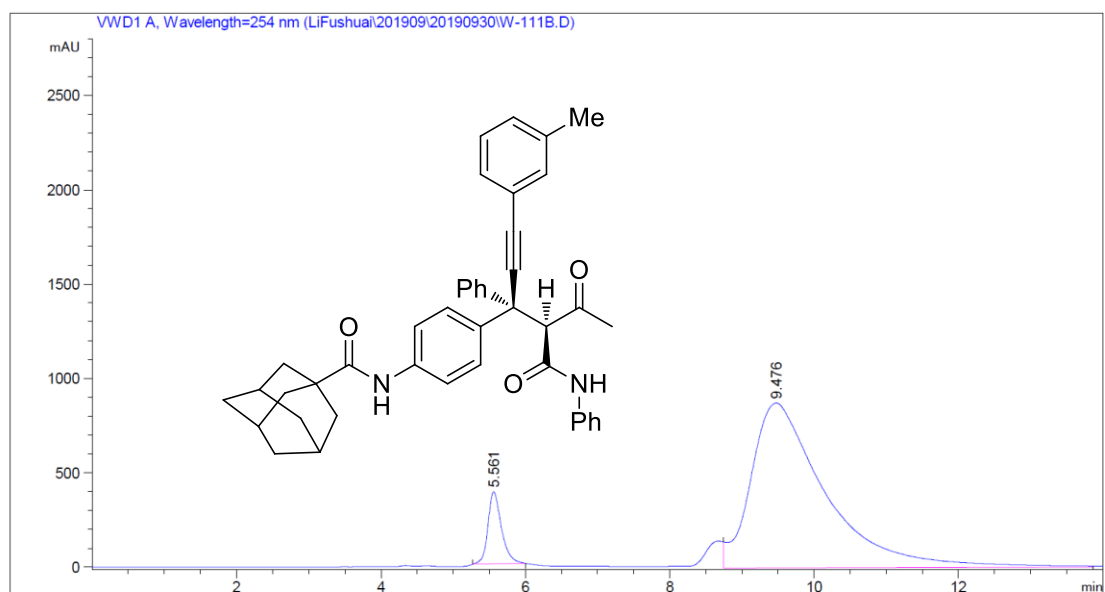

| # | Time  | Area    | Height | Width  | Symmetry | Area % |
|---|-------|---------|--------|--------|----------|--------|
| 1 | 5.561 | 4996.6  | 382.2  | 0.2179 | 0.714    | 7.340  |
| 2 | 9.476 | 63074.5 | 874.6  | 1.202  | 0.493    | 92.660 |

**(1*r*,3*R*,5*S*)-*N*-(4-((3*R*,4*S*)-1-(2-fluorophenyl)-5-oxo-3-phenyl-4-(phenylcarbamoyl)hex-1-yn-3-yl)phenyl)adamantane-1-carboxamide (3a)**

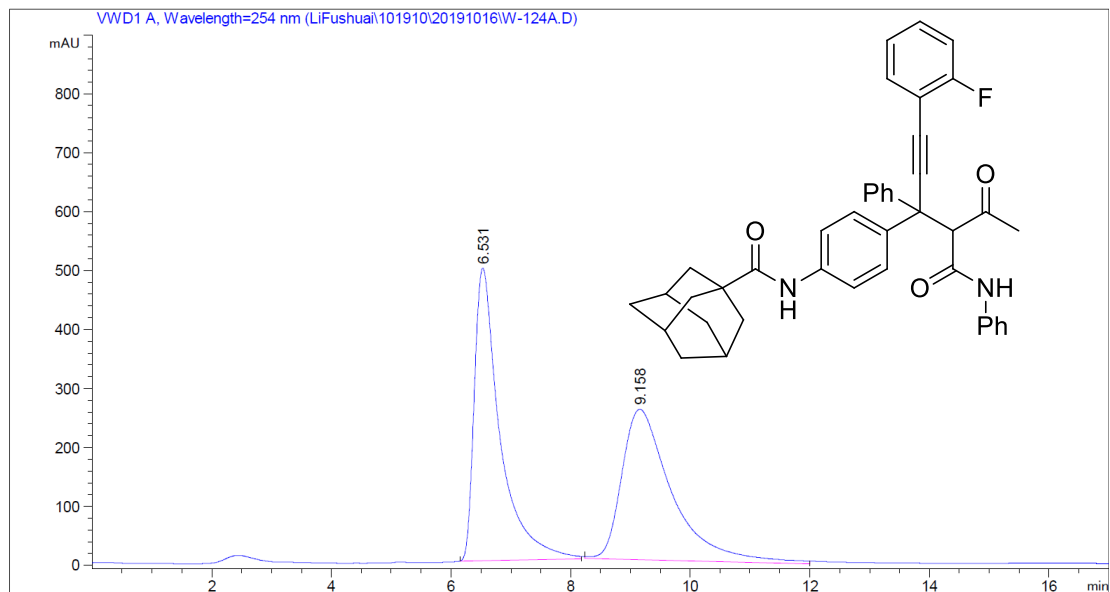

| # | Time  | Area    | Height | Width  | Symmetry | Area % |
|---|-------|---------|--------|--------|----------|--------|
| 1 | 6.531 | 14786.9 | 496.6  | 0.4963 | 0.469    | 49.930 |
| 2 | 9.158 | 14828.5 | 255.1  | 0.969  | 0.54     | 50.070 |

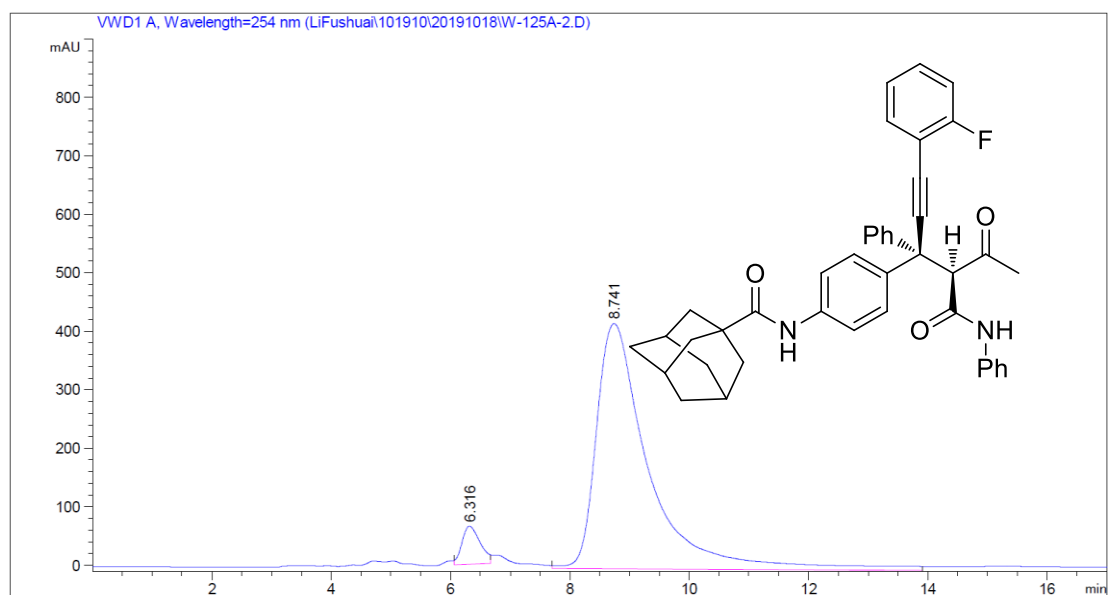

| # | Time  | Area    | Height | Width  | Symmetry | Area % |
|---|-------|---------|--------|--------|----------|--------|
| 1 | 6.316 | 1388.5  | 64.9   | 0.3563 | 0.676    | 5.114  |
| 2 | 8.741 | 25761.5 | 419.2  | 1.0243 | 0.487    | 94.886 |



**(1*r*,3*R*,5*S*)-*N*-(4-((3*R*,4*S*)-1-(2-chlorophenyl)-5-oxo-3-phenyl-4-(phenylcarbamoyl)hex-1-yn-3-yl)phenyl)adamantane-1-carboxamide (3ma)**

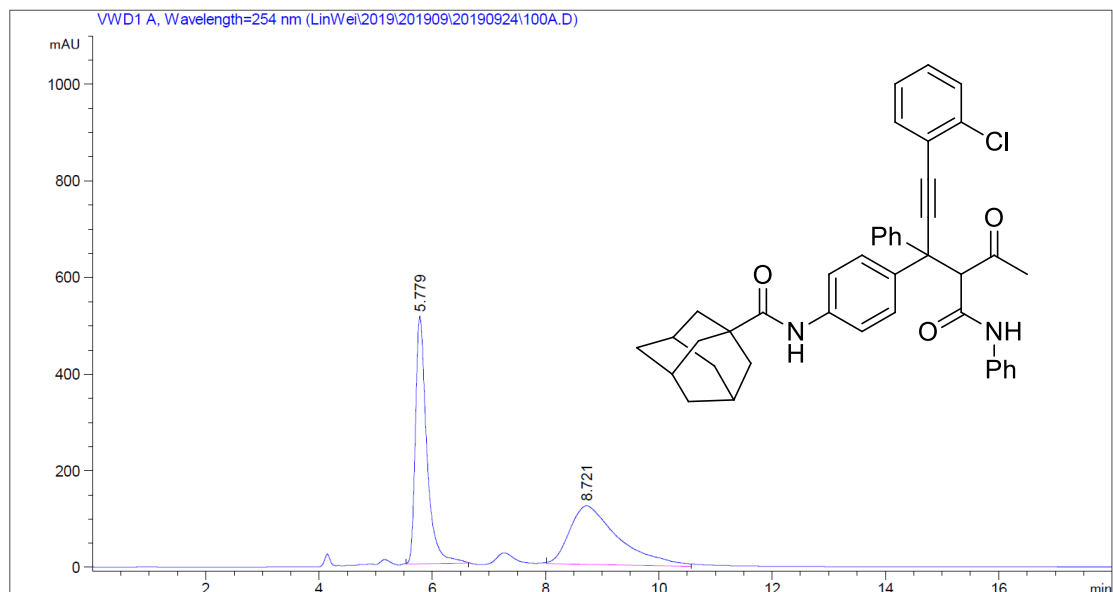

| # | Time  | Area   | Height | Width  | Symmetry | Area % |
|---|-------|--------|--------|--------|----------|--------|
| 1 | 5.779 | 7181.3 | 512.9  | 0.2334 | 0.599    | 49.908 |
| 2 | 8.721 | 7207.9 | 121.2  | 0.9915 | 0.509    | 50.092 |

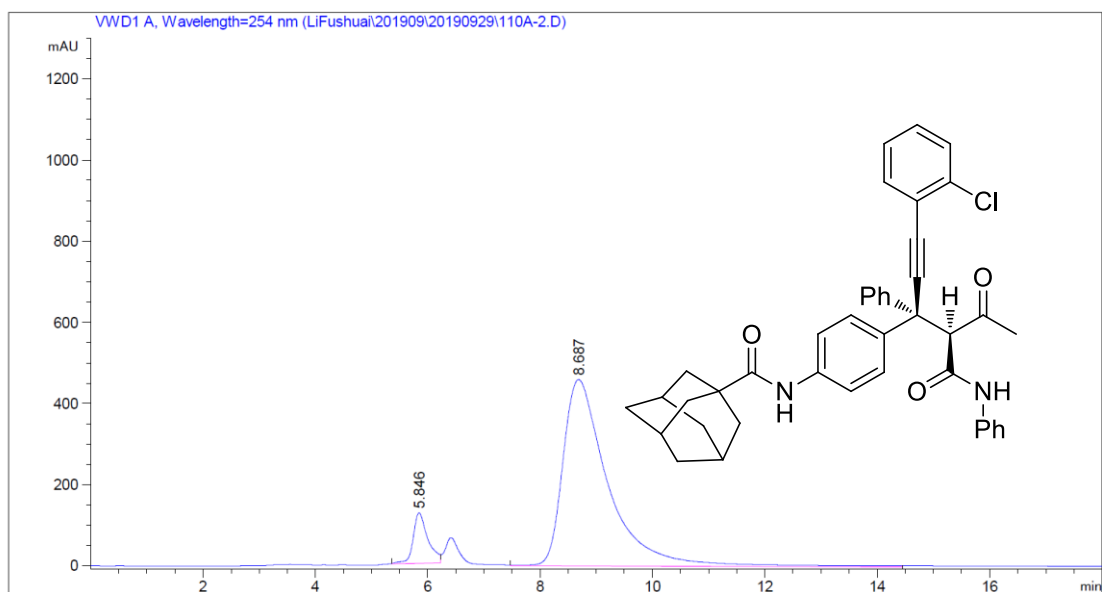

| # | Time  | Area    | Height | Width  | Symmetry | Area % |
|---|-------|---------|--------|--------|----------|--------|
| 1 | 5.846 | 2258.5  | 124.5  | 0.3024 | 0.669    | 7.956  |
| 2 | 8.687 | 26128.8 | 459.7  | 0.9474 | 0.498    | 92.044 |

**(1*r*,3*R*,5*S*)-*N*-(4-((3*R*,4*S*)-1-(2-bromophenyl)-5-oxo-3-phenyl-4-(phenylcarbamoyl)hex-1-yn-3-yl)phenyl)adamantane-1-carboxamide (3na)**

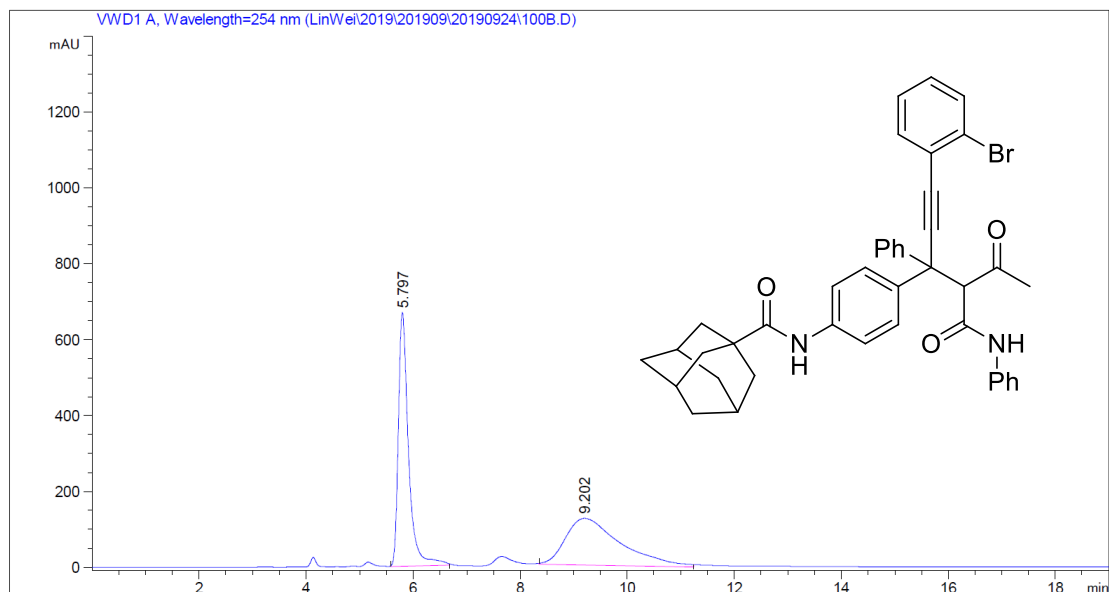

| # | Time  | Area   | Height | Width  | Symmetry | Area % |
|---|-------|--------|--------|--------|----------|--------|
| 1 | 5.797 | 8815.5 | 669    | 0.2196 | 0.611    | 50.031 |
| 2 | 9.202 | 8804.6 | 123.1  | 1.1925 | 0.509    | 49.969 |

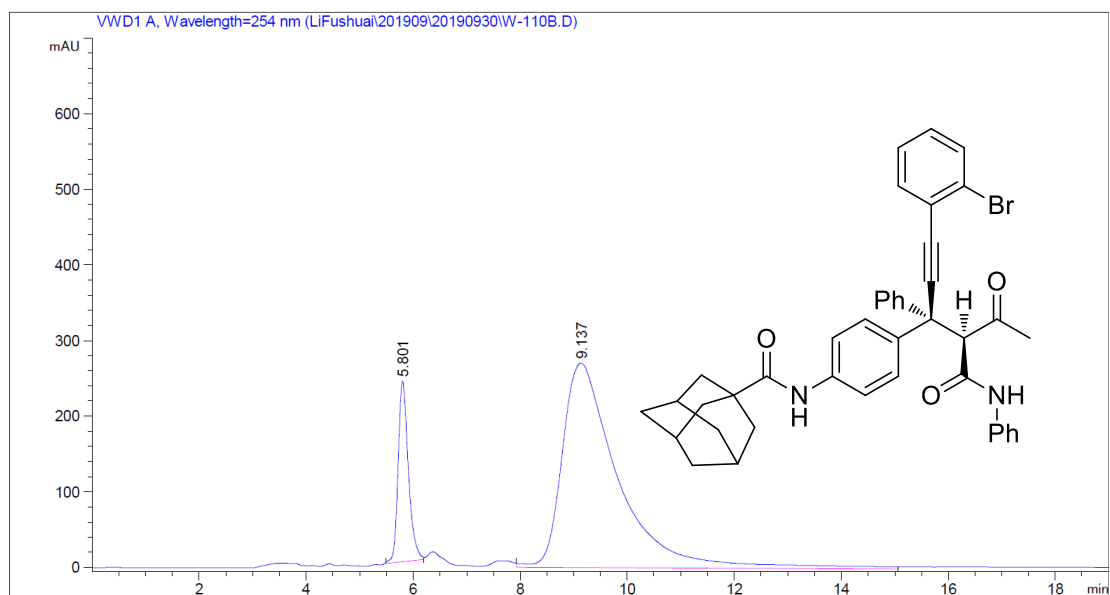

| # | Time  | Area    | Height | Width  | Symmetry | Area % |
|---|-------|---------|--------|--------|----------|--------|
| 1 | 5.801 | 3166.1  | 238.9  | 0.2209 | 0.75     | 13.805 |
| 2 | 9.137 | 19767.6 | 270.5  | 1.2181 | 0.485    | 86.195 |

**(1*r*,3*R*,5*S*)-*N*-(4-((3*R*,4*S*)-1-(2-methoxyphenyl)-5-oxo-3-phenyl-4-(phenylcarbamoyl)hex-1-yn-3-yl)phenyl)adamantane-1-carboxamide (3oa)**

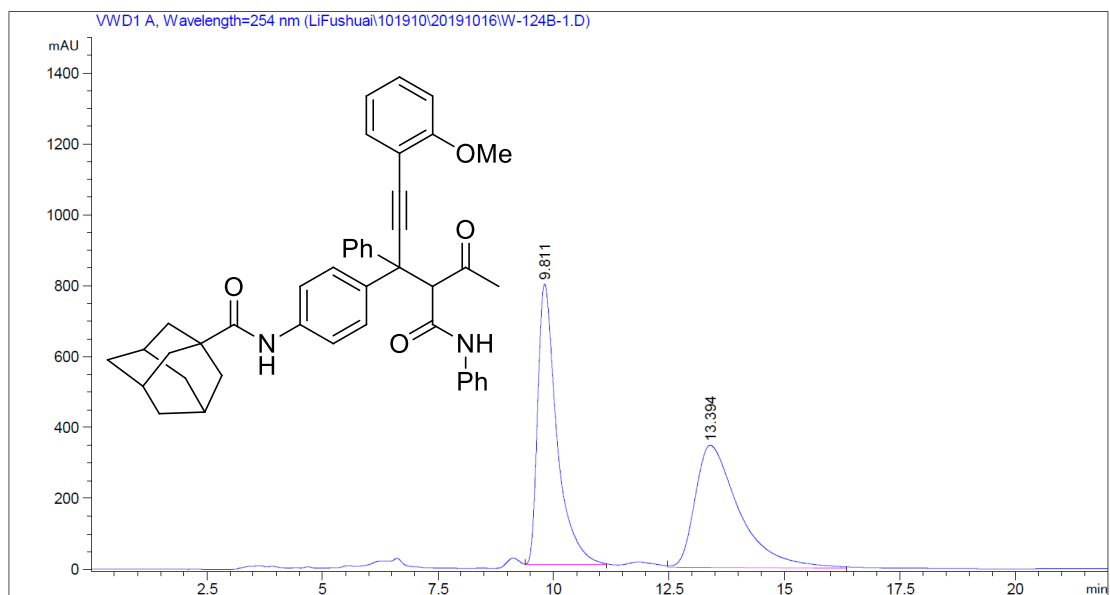

| # | Time   | Area    | Height | Width  | Symmetry | Area % |
|---|--------|---------|--------|--------|----------|--------|
| 1 | 9.811  | 22812.3 | 791.2  | 0.4805 | 0.544    | 50.000 |
| 2 | 13.394 | 22812.1 | 344.6  | 1.1033 | 0.504    | 50.000 |

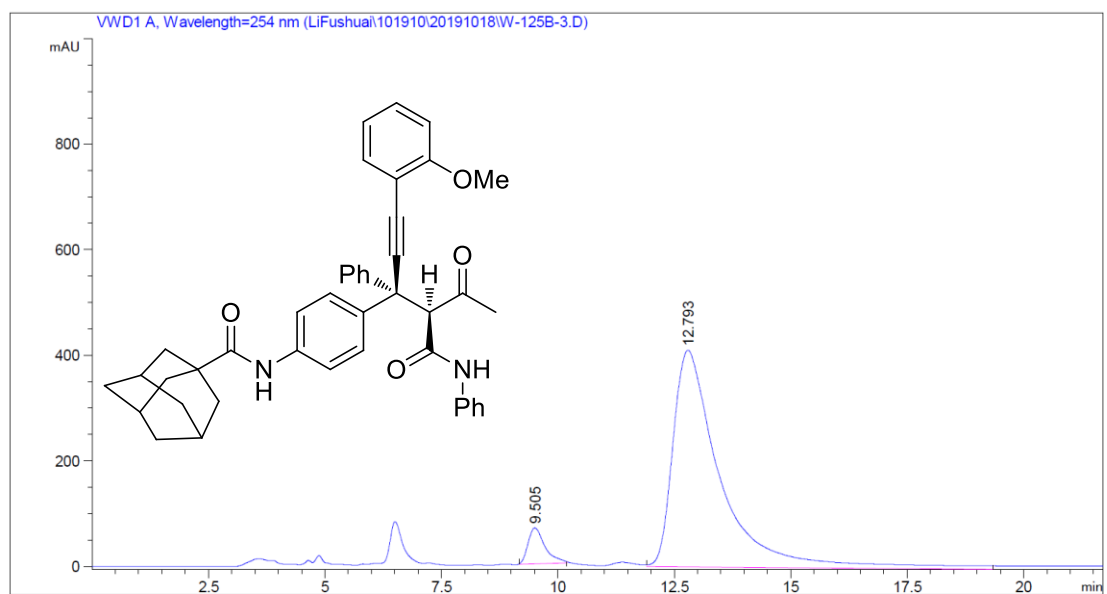

| # | Time   | Area    | Height | Width  | Symmetry | Area % |
|---|--------|---------|--------|--------|----------|--------|
| 1 | 9.505  | 1728.1  | 68.2   | 0.4225 | 0.645    | 5.545  |
| 2 | 12.793 | 29439.5 | 410.9  | 1.194  | 0.437    | 94.455 |

**(1*r*,3*R*,5*S*)-*N*-(4-((3*S*,4*R*)-2-oxo-4-phenyl-3-(phenylcarbamoyl)dec-5-yn-4-yl)phenyl)adamantane-1-carboxamide (3*pa*)**

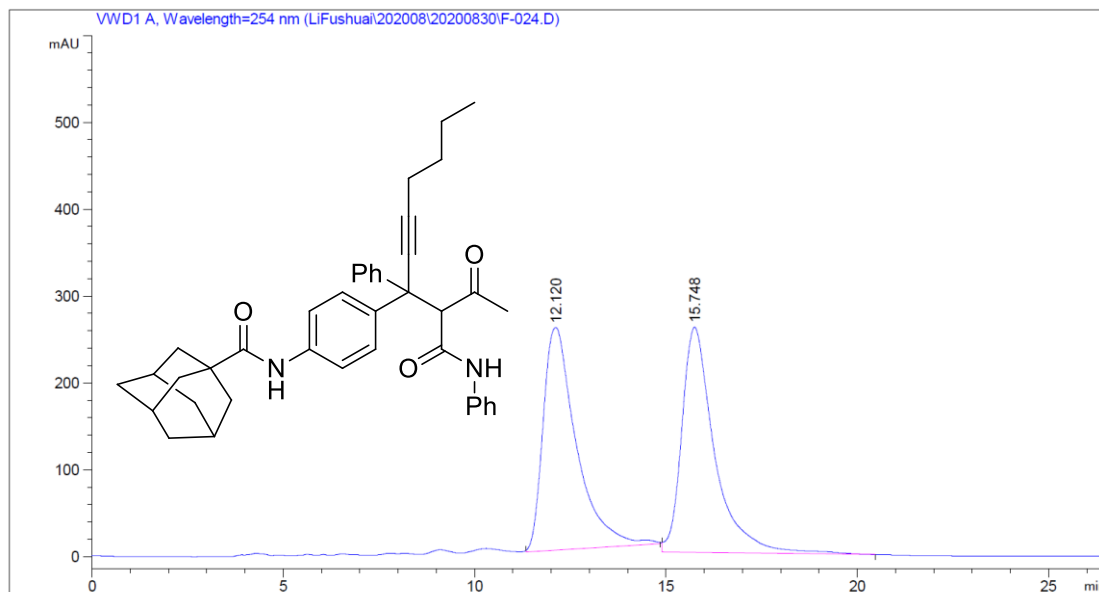

| # | Time   | Area    | Height | Width  | Symmetry | Area % |
|---|--------|---------|--------|--------|----------|--------|
| 1 | 12.12  | 15543.2 | 256.6  | 1.0096 | 0.574    | 50.011 |
| 2 | 15.748 | 15536.2 | 259.6  | 0.9976 | 0.601    | 49.989 |

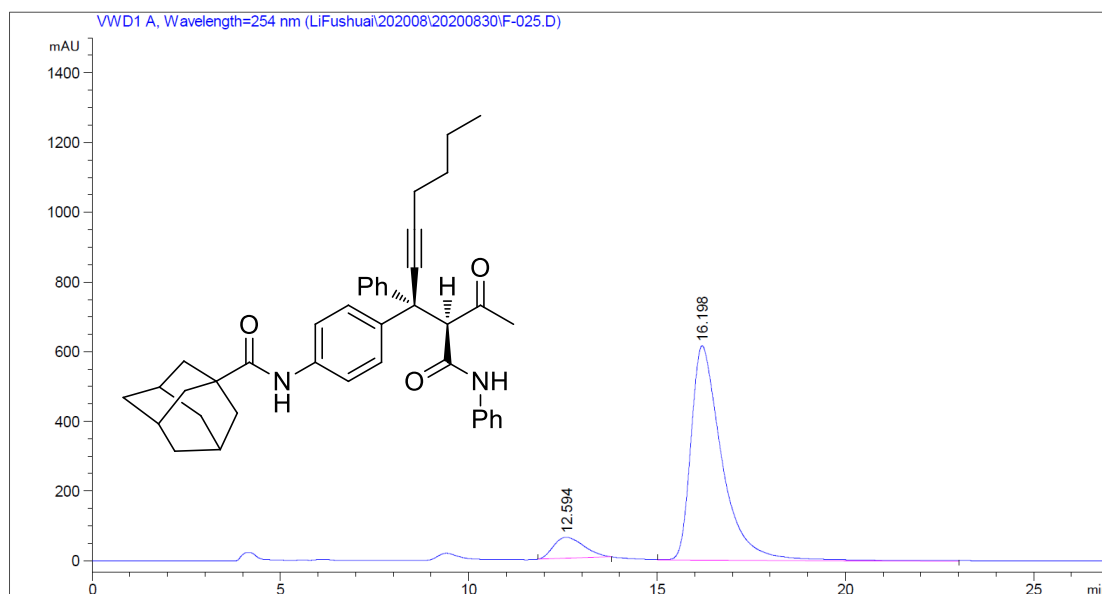

| # | Time   | Area    | Height | Width  | Symmetry | Area % |
|---|--------|---------|--------|--------|----------|--------|
| 1 | 12.594 | 3397.3  | 60.4   | 0.9372 | 0.721    | 8.729  |
| 2 | 16.198 | 35522.8 | 615.8  | 0.9615 | 0.532    | 91.271 |

**(1*r*,3*R*,5*S*)-*N*-(4-((3*R*,4*S*)-1-cyclopropyl-5-oxo-3-phenyl-4-(phenylcarbamoyl)hex-1-yn-3-yl)phenyl)adamantane-1-carboxamide (3qa)**

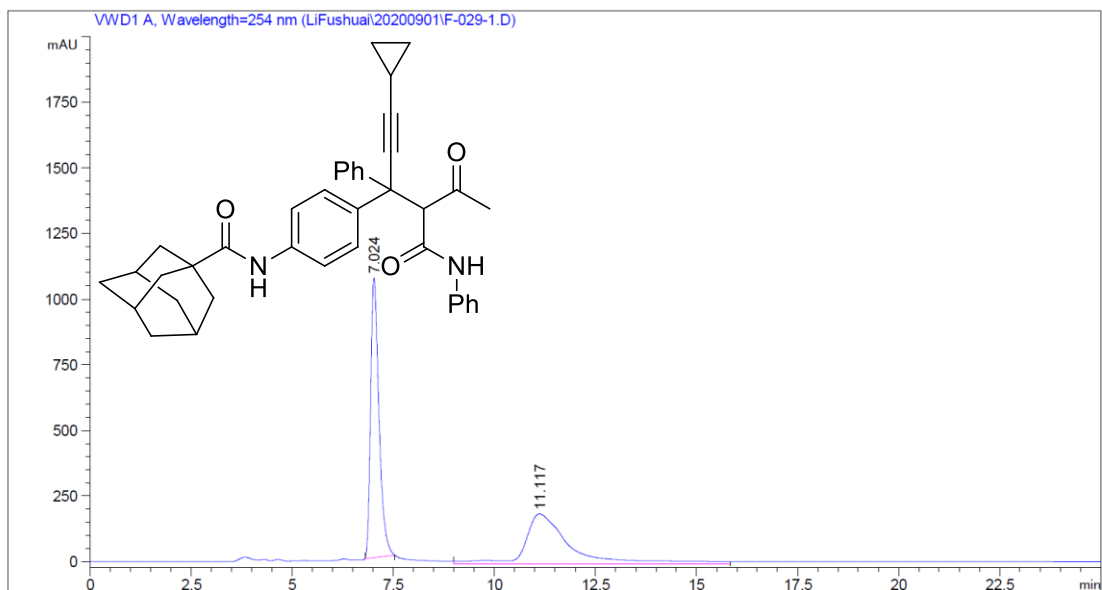

| # | Time   | Area    | Height | Width  | Symmetry | Area % |
|---|--------|---------|--------|--------|----------|--------|
| 1 | 7.024  | 15344.5 | 1065   | 0.2401 | 0.651    | 50.056 |
| 2 | 11.117 | 15309.9 | 191.5  | 1.3321 | 0.483    | 49.944 |

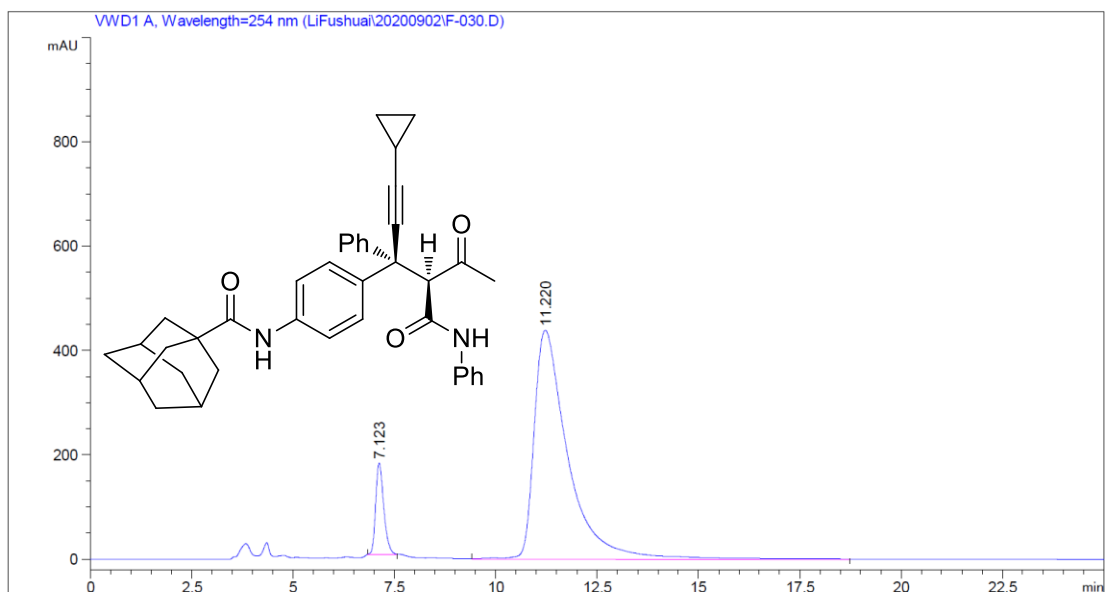

| # | Time  | Area    | Height | Width  | Symmetry | Area % |
|---|-------|---------|--------|--------|----------|--------|
| 1 | 7.123 | 2431.4  | 175.5  | 0.2309 | 0.732    | 8.517  |
| 2 | 11.22 | 26114.7 | 439.6  | 0.9901 | 0.46     | 91.483 |

**(1*r*,3*R*,5*S*)-*N*-(4-((3*R*,4*S*)-4-((4-chlorophenyl)carbamoyl)-5-oxo-1,3-diphenylhex-1-yn-3-yl)phenyl)adamantane-1-carboxamide (3ab)**

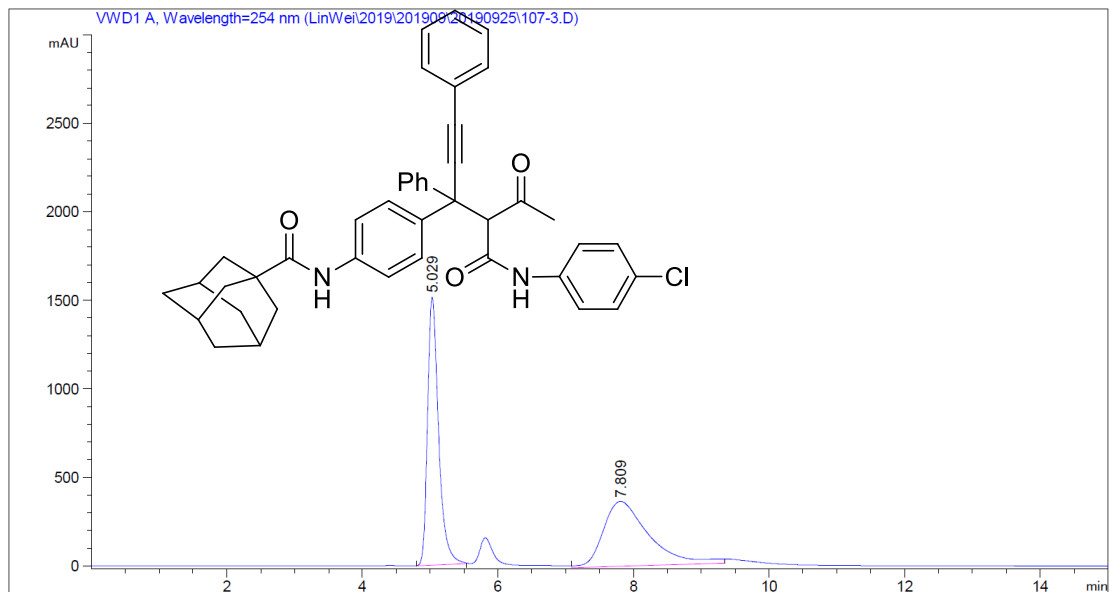

| # | Time  | Area    | Height | Width  | Symmetry | Area % |
|---|-------|---------|--------|--------|----------|--------|
| 1 | 5.029 | 17104.5 | 1514   | 0.1883 | 0.685    | 49.984 |
| 2 | 7.809 | 17115.2 | 366.5  | 0.7783 | 0.59     | 50.016 |

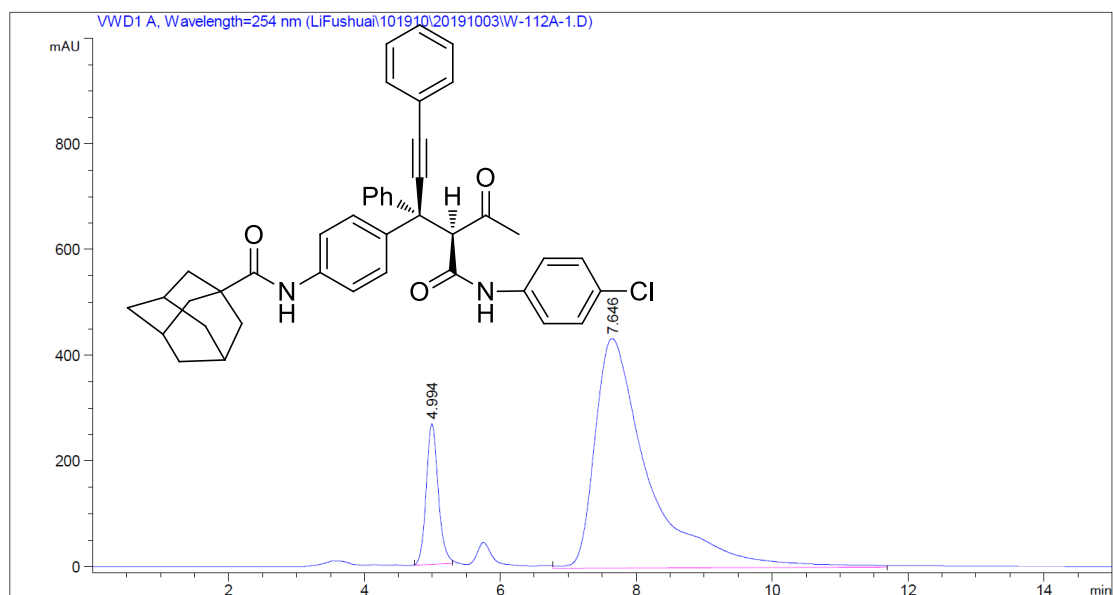

| # | Time  | Area    | Height | Width  | Symmetry | Area % |
|---|-------|---------|--------|--------|----------|--------|
| 1 | 4.994 | 3259.1  | 266.1  | 0.2041 | 0.866    | 12.046 |
| 2 | 7.646 | 23796.3 | 434.5  | 0.9128 | 0.456    | 87.954 |

**(1*r*,3*R*,5*S*)-*N*-(4-((3*R*,4*S*)-5-oxo-1,3-diphenyl-4-(*p*-tolylcarbamoyl)hex-1-yn-3-yl)phenyl)adamantane-1-carboxamide (3*c*)**

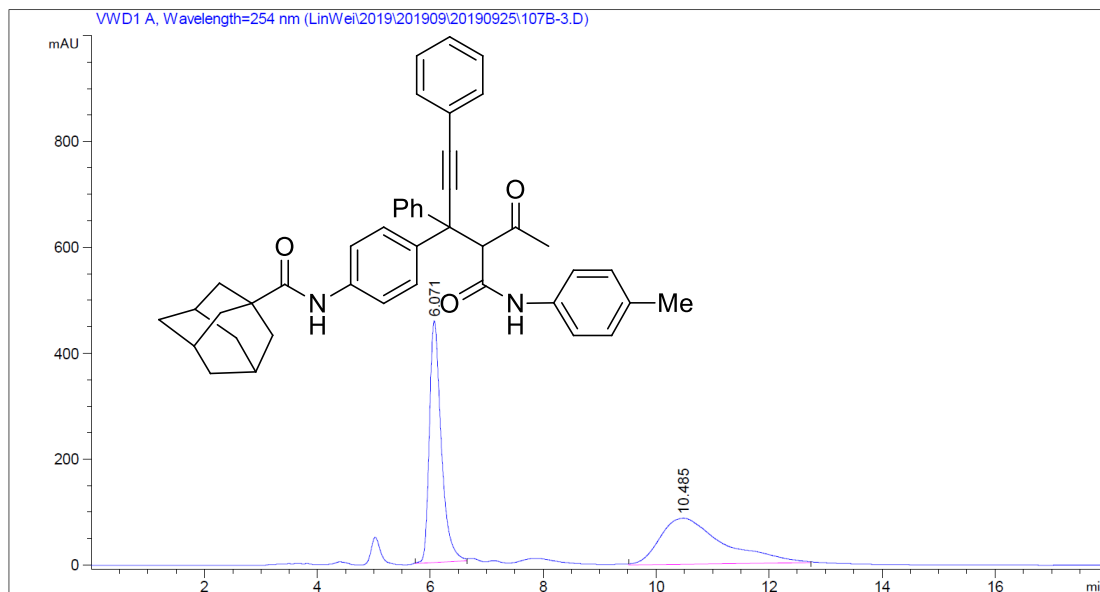

| # | Time   | Area   | Height | Width  | Symmetry | Area % |
|---|--------|--------|--------|--------|----------|--------|
| 1 | 6.071  | 6707.9 | 456.7  | 0.2448 | 0.654    | 49.926 |
| 2 | 10.485 | 6727.9 | 86.6   | 1.295  | 0.573    | 50.074 |

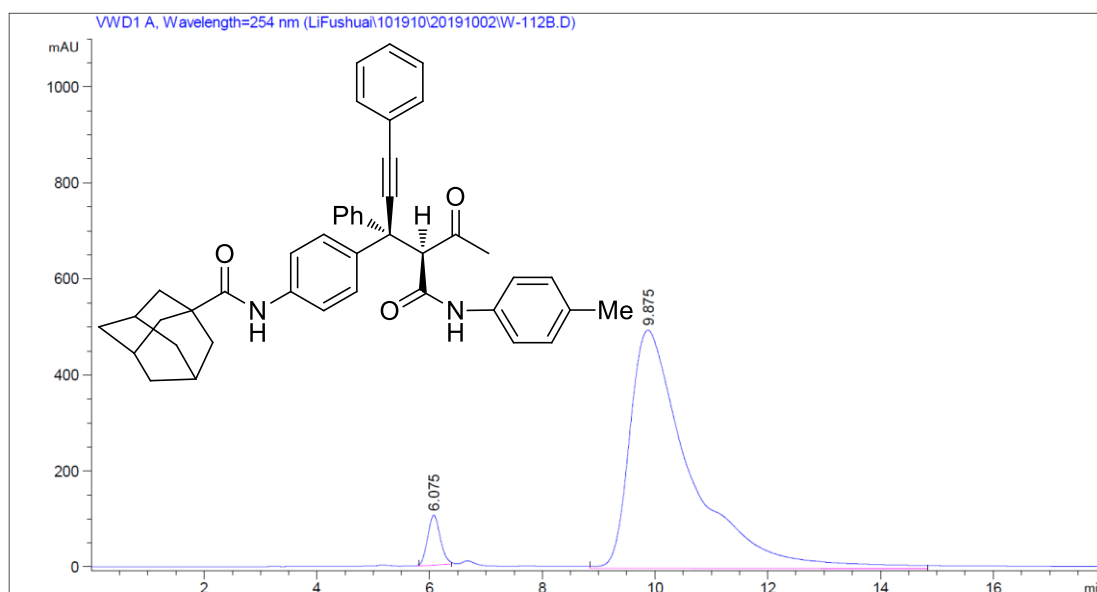

| # | Time  | Area    | Height | Width  | Symmetry | Area % |
|---|-------|---------|--------|--------|----------|--------|
| 1 | 6.075 | 1630.7  | 104.4  | 0.2603 | 0.923    | 4.205  |
| 2 | 9.875 | 37145.1 | 496.5  | 1.2469 | 0.409    | 95.795 |

**(1*r*,3*R*,5*S*)-*N*-(4-((3*R*,4*S*)-4-(4-methoxyphenyl)carbamoyl)-5-oxo-1,3-diphenylhex-1-yn-3-yl)phenyladamantane-1-carboxamide (3*d*)**

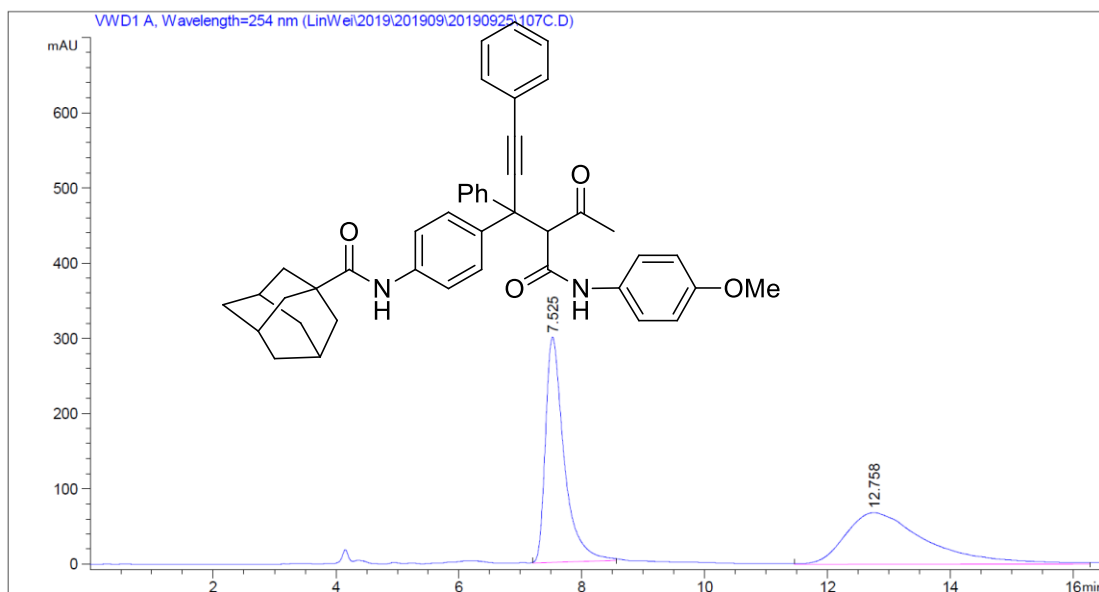

| # | Time   | Area   | Height | Width  | Symmetry | Area % |
|---|--------|--------|--------|--------|----------|--------|
| 1 | 7.525  | 6304.8 | 299.3  | 0.351  | 0.573    | 49.902 |
| 2 | 12.758 | 6329.5 | 68.8   | 1.5342 | 0.528    | 50.098 |

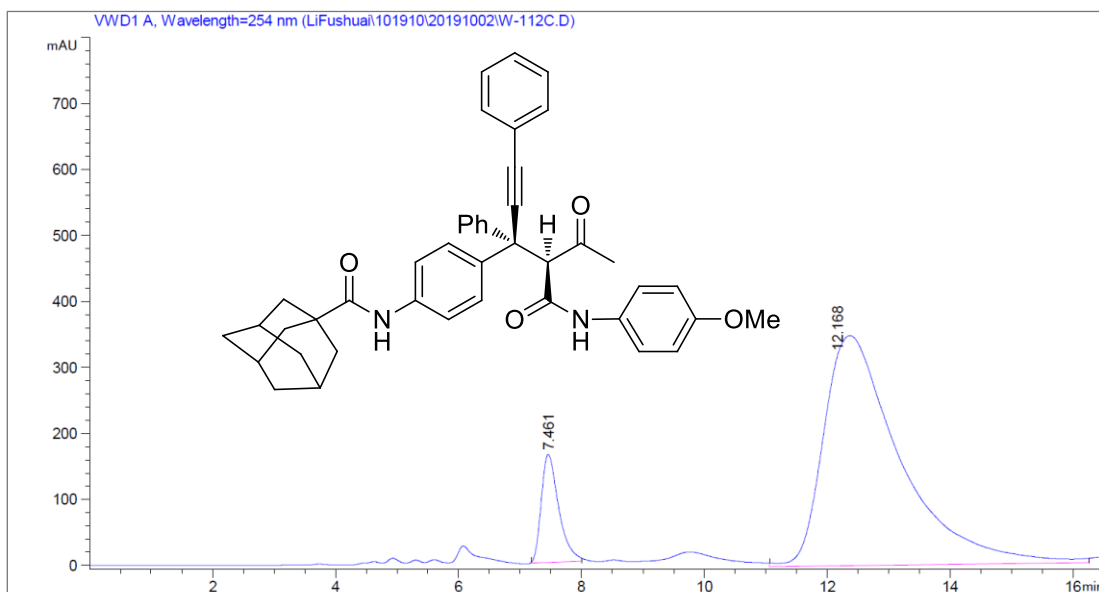

| # | Time   | Area    | Height | Width  | Symmetry | Area % |
|---|--------|---------|--------|--------|----------|--------|
| 1 | 7.461  | 3219.3  | 163.4  | 0.3285 | 0.642    | 9.646  |
| 2 | 12.168 | 30156.7 | 296.6  | 1.6947 | 0        | 90.354 |



**(1*r*,3*R*,5*S*)-N-(4-((3*R*,4*S*)-5-oxo-1,3-diphenyl-4-((4-(trifluoromethyl)phenyl)carbamoyl)hex-1-yn-3-yl)phenyl)adamantane-1-carboxamide (3ae)**

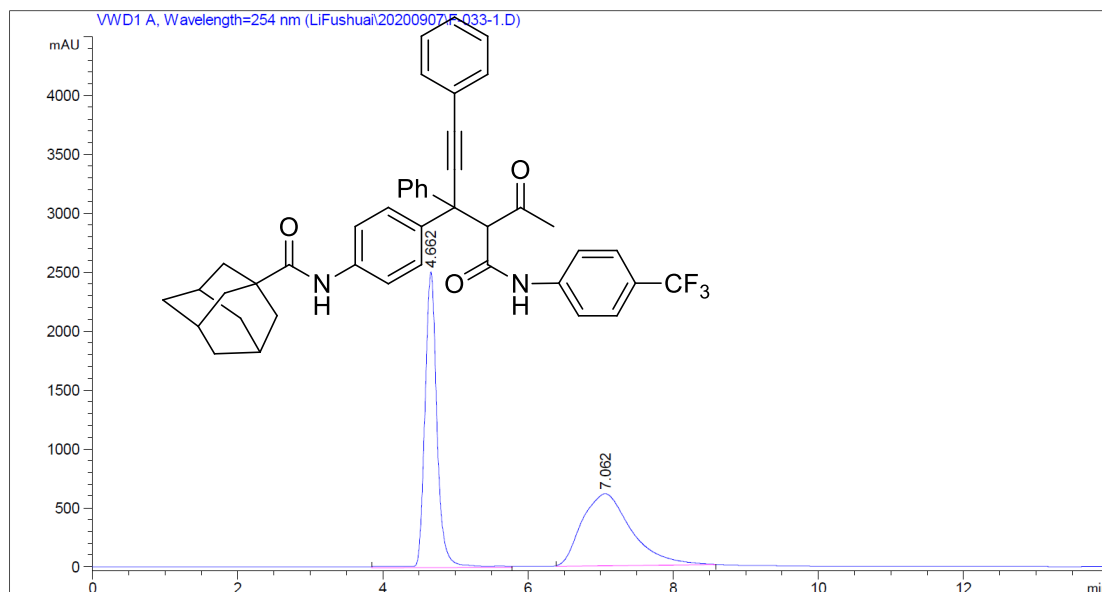

| # | Time  | Area    | Height | Width  | Symmetry | Area % |
|---|-------|---------|--------|--------|----------|--------|
| 1 | 4.662 | 29075   | 2506.5 | 0.1933 | 0.922    | 49.990 |
| 2 | 7.062 | 29086.8 | 613.1  | 0.7908 | 0.841    | 50.010 |

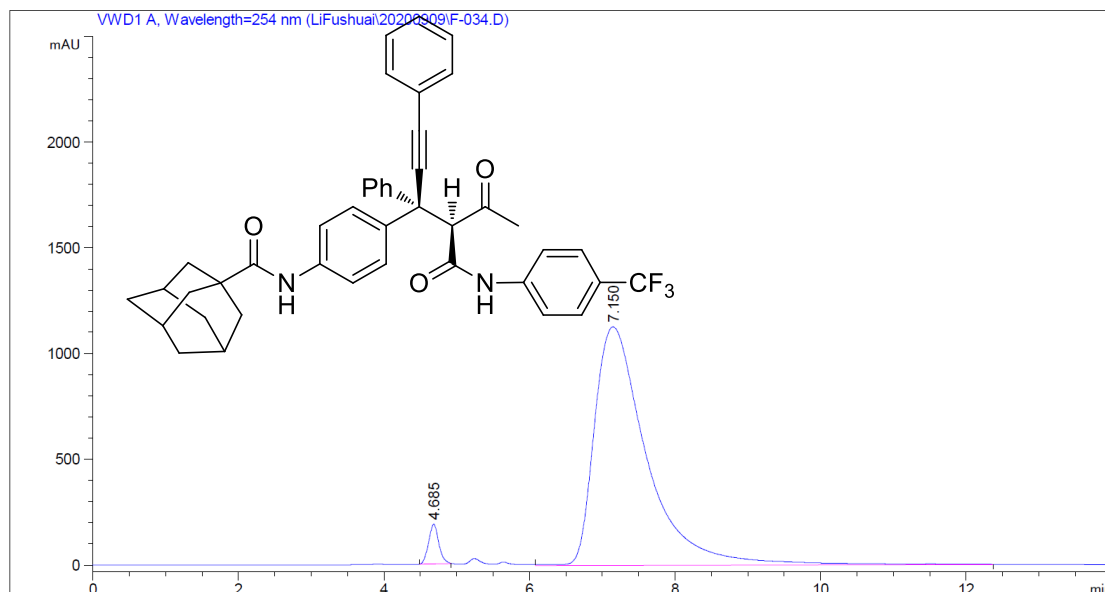

| # | Time  | Area   | Height | Width  | Symmetry | Area % |
|---|-------|--------|--------|--------|----------|--------|
| 1 | 4.685 | 1829.9 | 188    | 0.1622 | 0.963    | 3.116  |
| 2 | 7.15  | 56902  | 1128.1 | 0.8406 | 0.522    | 96.884 |

**(1*r*,3*R*,5*S*)-*N*-(4-((3*R*,4*S*)-5-oxo-1,3-diphenyl-4-(*o*-tolylcarbonyl)hex-1-yn-3-yl)phenyl)adamantane-1-carboxamide (3af)**

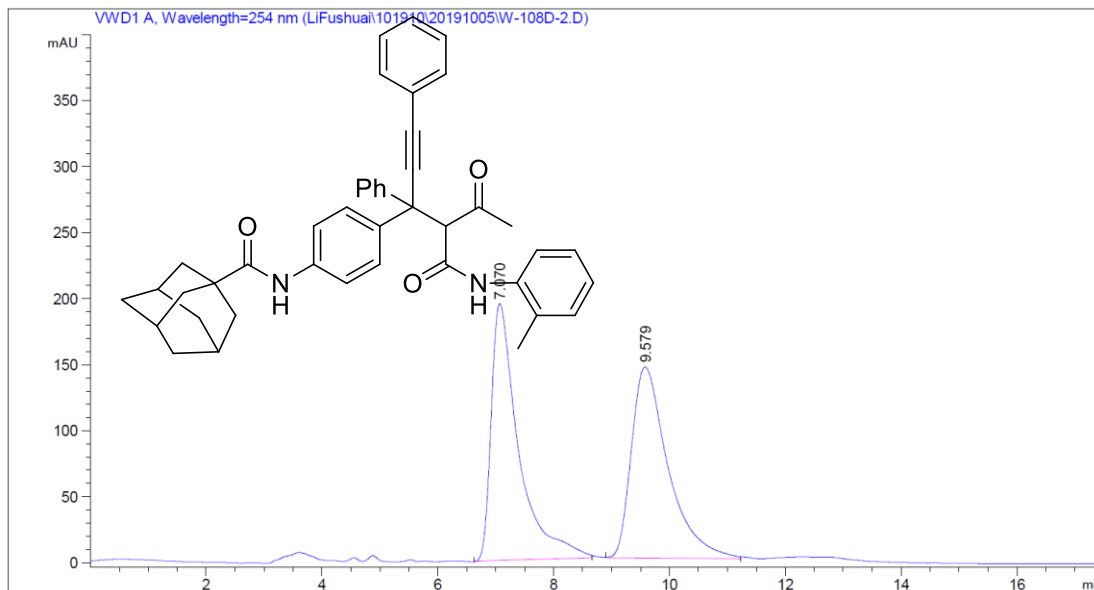

| # | Time  | Area   | Height | Width  | Symmetry | Area % |
|---|-------|--------|--------|--------|----------|--------|
| 1 | 7.07  | 6364.2 | 194.3  | 0.546  | 0.433    | 49.931 |
| 2 | 9.579 | 6381.7 | 144.7  | 0.7353 | 0.569    | 50.069 |

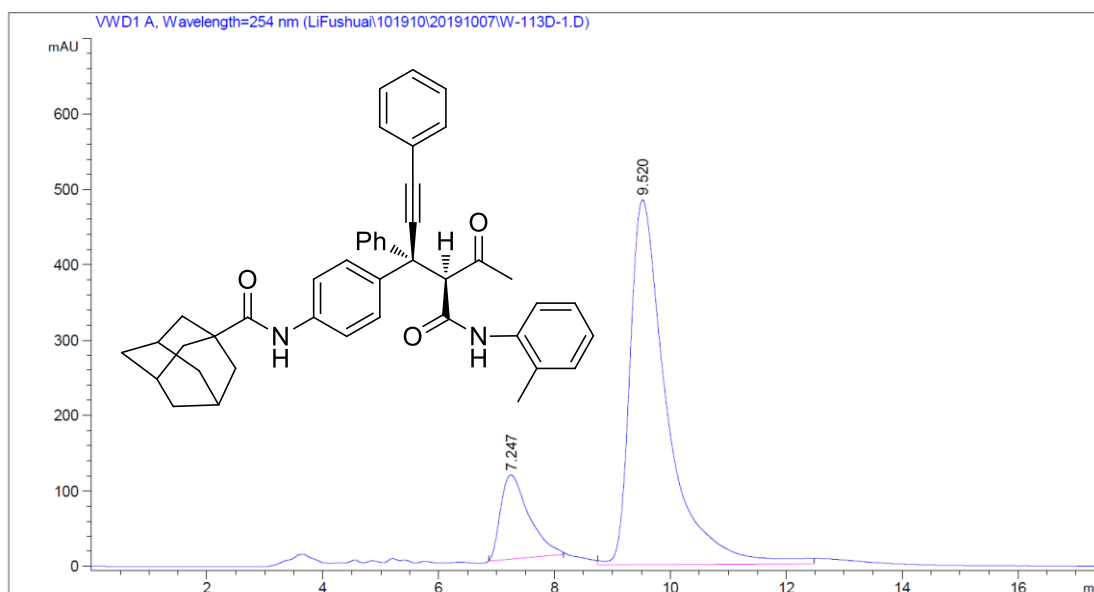

| # | Time  | Area   | Height | Width  | Symmetry | Area % |
|---|-------|--------|--------|--------|----------|--------|
| 1 | 7.247 | 3772.8 | 111.5  | 0.564  | 0.556    | 15.022 |
| 2 | 9.52  | 21342  | 483.8  | 0.7353 | 0.493    | 84.978 |

**(1*r*,3*R*,5*S*)-*N*-(4-((3*R*,4*S*)-4-(2,4-dimethylphenyl)carbamoyl)-5-oxo-1,3-diphenylhex-1-yn-3-yl)phenyladamantane-1-carboxamide (3ag)**

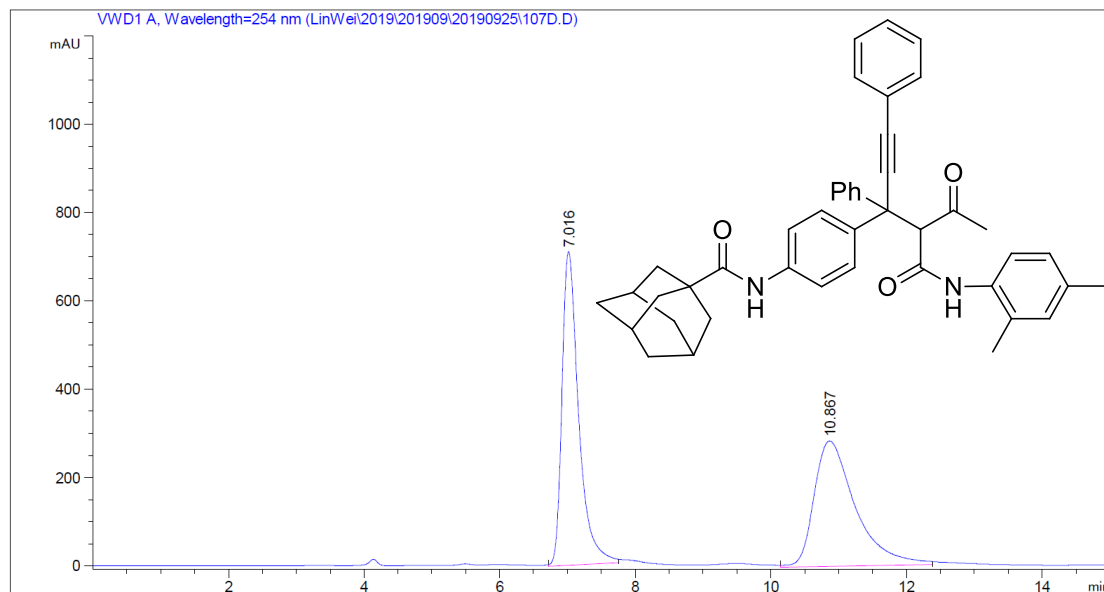

| # | Time   | Area    | Height | Width  | Symmetry | Area % |
|---|--------|---------|--------|--------|----------|--------|
| 1 | 7.016  | 12130.5 | 710    | 0.2847 | 0.619    | 50.100 |
| 2 | 10.867 | 12081.9 | 284.2  | 0.7086 | 0.586    | 49.900 |

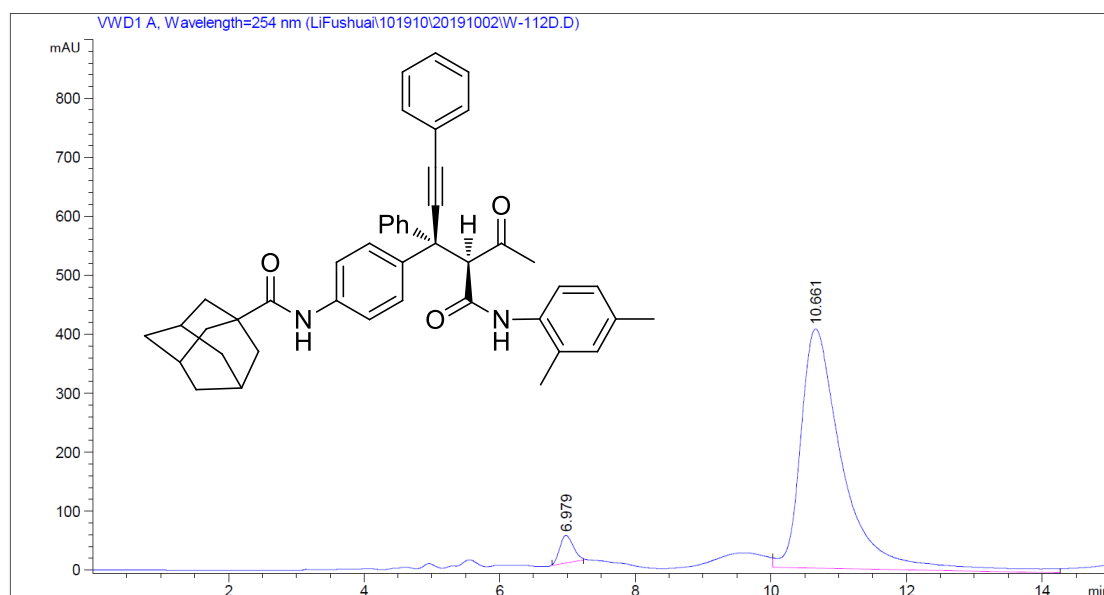

| # | Time   | Area    | Height | Width  | Symmetry | Area % |
|---|--------|---------|--------|--------|----------|--------|
| 1 | 6.979  | 651.7   | 46.8   | 0.2319 | 0.864    | 3.574  |
| 2 | 10.661 | 17581.6 | 406.2  | 0.7214 | 0.522    | 96.426 |

**(1*r*,3*R*,5*S*)-*N*-(4-((3*R*,4*S*)-6-methyl-5-oxo-1,3-diphenyl-4-(phenylcarbamoyl)hept-1-yn-3-yl)phenyl)adamantane-1-carboxamide (3ah)**

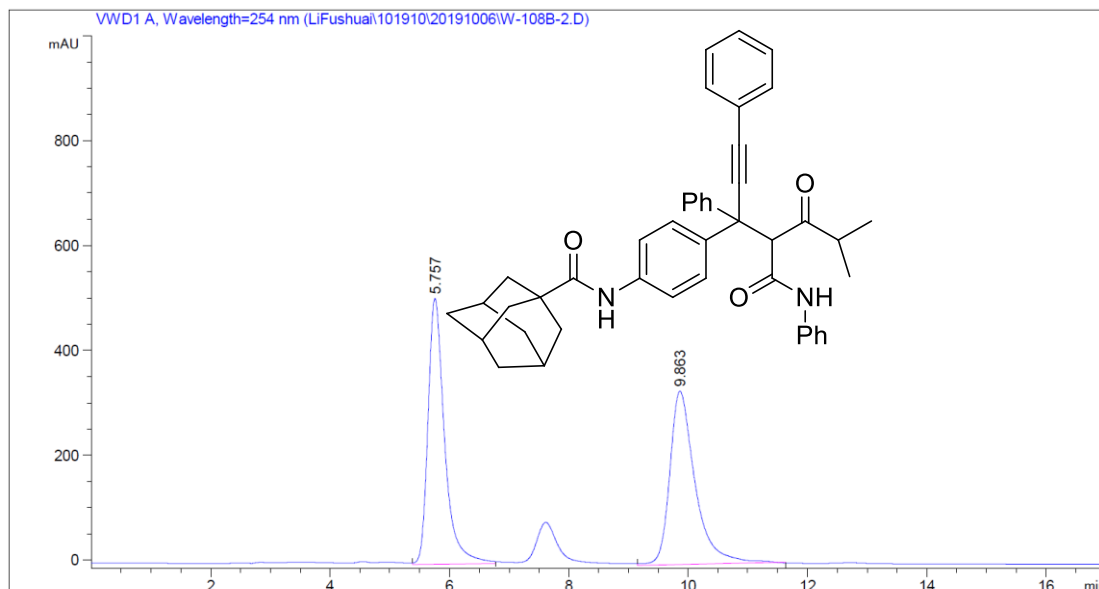

| # | Time  | Area   | Height | Width  | Symmetry | Area % |
|---|-------|--------|--------|--------|----------|--------|
| 1 | 5.757 | 9782.9 | 506.6  | 0.3218 | 0.684    | 49.989 |
| 2 | 9.863 | 9787.2 | 330.8  | 0.4931 | 0.65     | 50.011 |

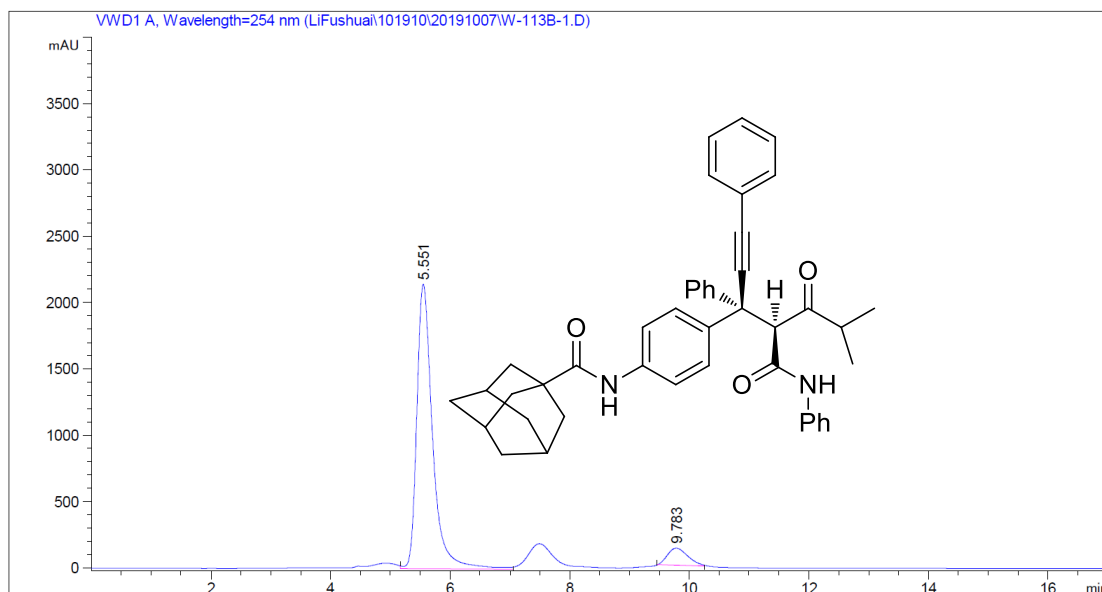

| # | Time  | Area    | Height | Width  | Symmetry | Area % |
|---|-------|---------|--------|--------|----------|--------|
| 1 | 5.551 | 39375.3 | 2143.7 | 0.3061 | 0.652    | 92.870 |
| 2 | 9.783 | 3022.9  | 128.6  | 0.3918 | 0.732    | 7.130  |

## J: NMR Analysis

### (1*r*,3*R*,5*S*)-*N*-(4-((3*R*,4*S*)-5-oxo-1,3-diphenyl-4-(phenylcarbamoyl)hex-1-yn-3-yl)phenyl)adamantane-1-carboxamide (3aa)

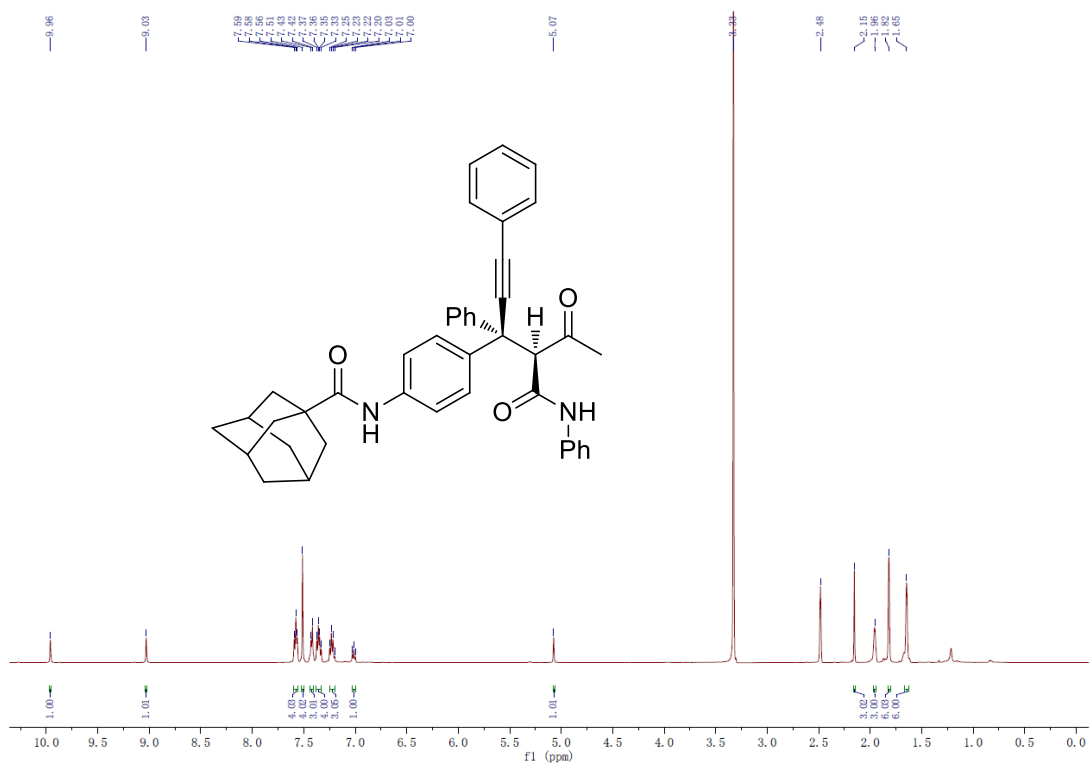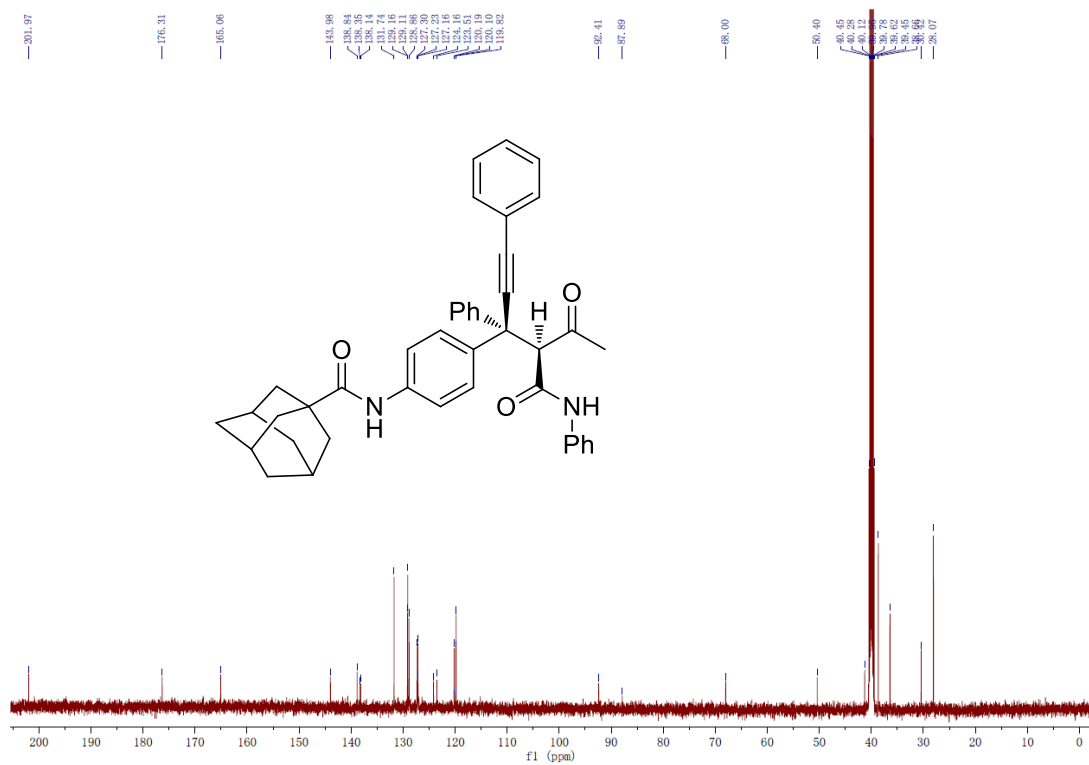

***N*-4-((3*R*,4*S*)-5-oxo-1,3-diphenyl-4-(phenylcarbamoyl)hex-1-yn-3-yl)phenyl)-3,5-bis(trifluoromethyl)benzamide (3ba)**

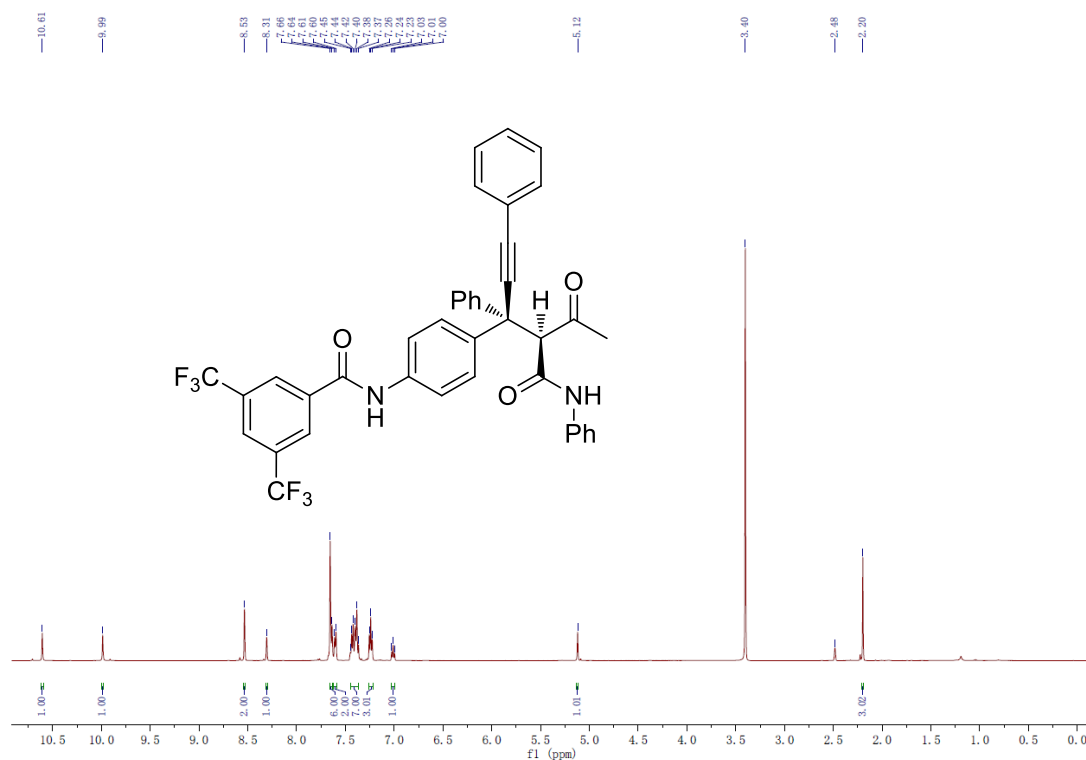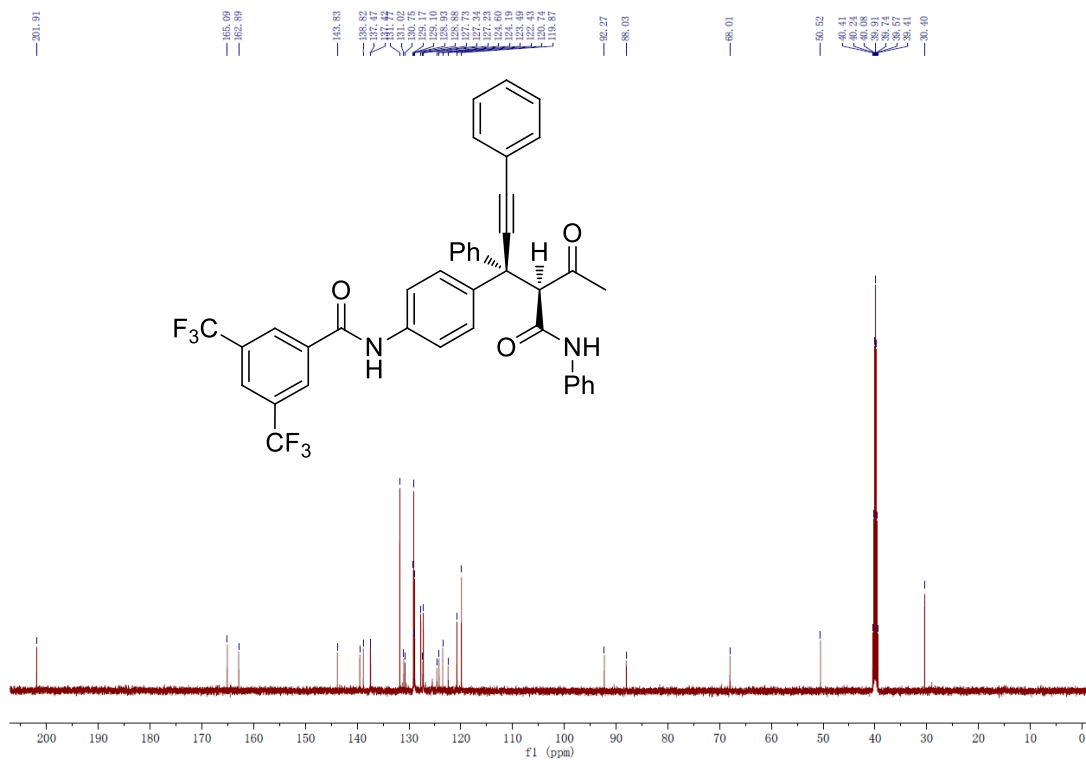

**(2*S*,3*R*)-2-acetyl-*N*,3,5-triphenyl-3-(4-pivalamidophenyl)pent-4-ynamide (3ca)**

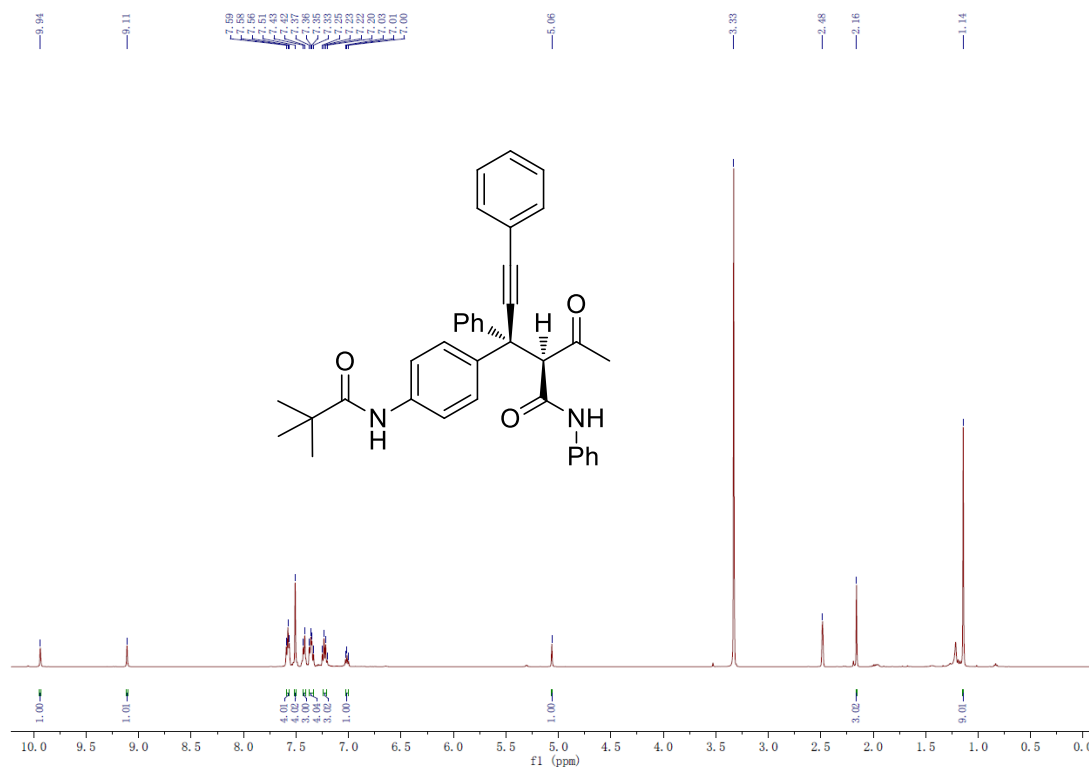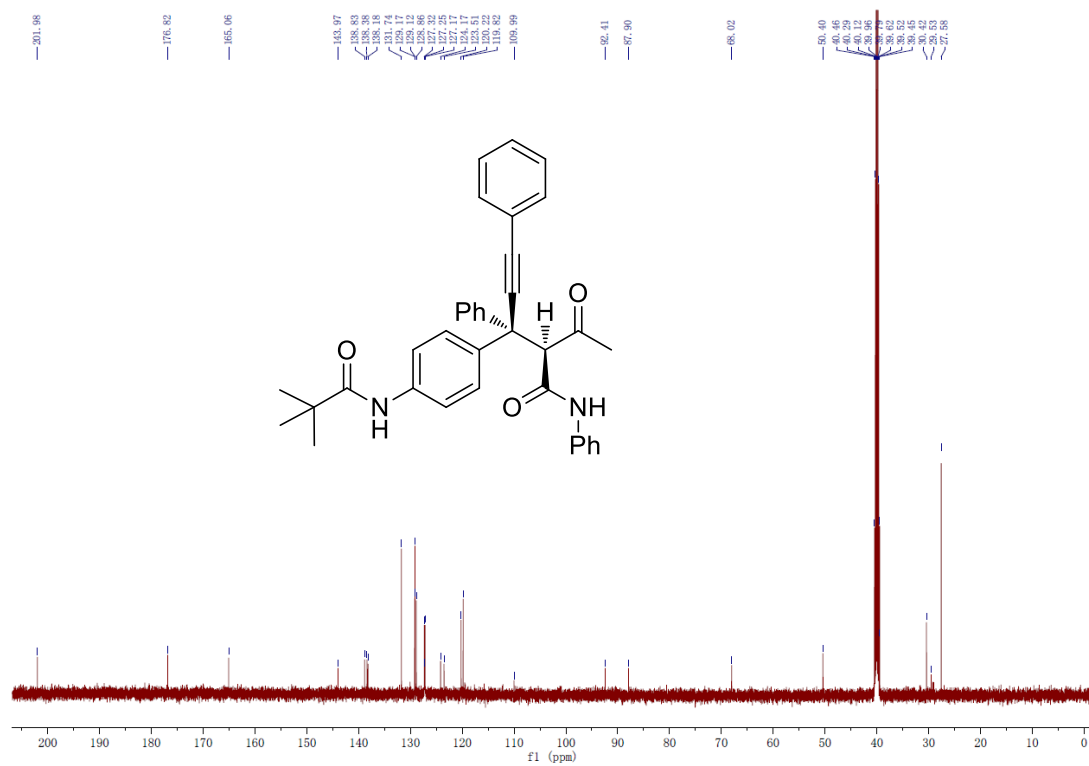

**(1*r*,3*R*,5*S*)-*N*-(4-((3*R*,4*S*)-1-(4-fluorophenyl)-5-oxo-3-phenyl-4-(phenylcarbamoyl)hex-1-yn-3-yl)phenyl)adamantane-1-carboxamide (3ea)**

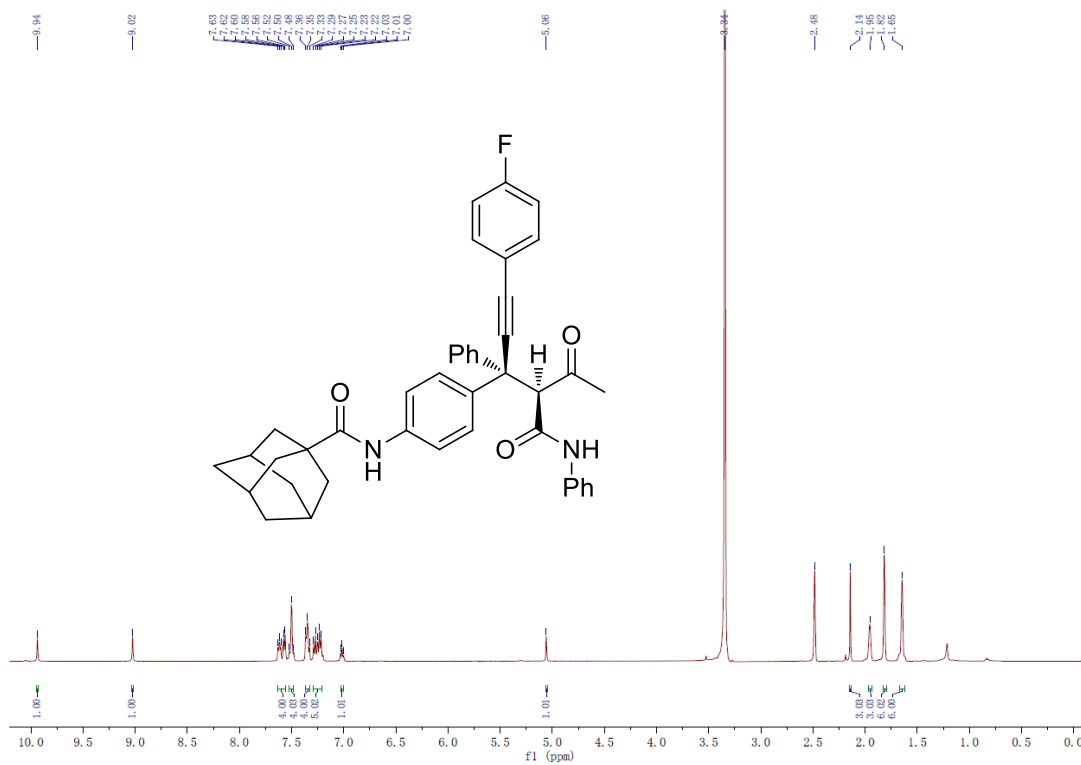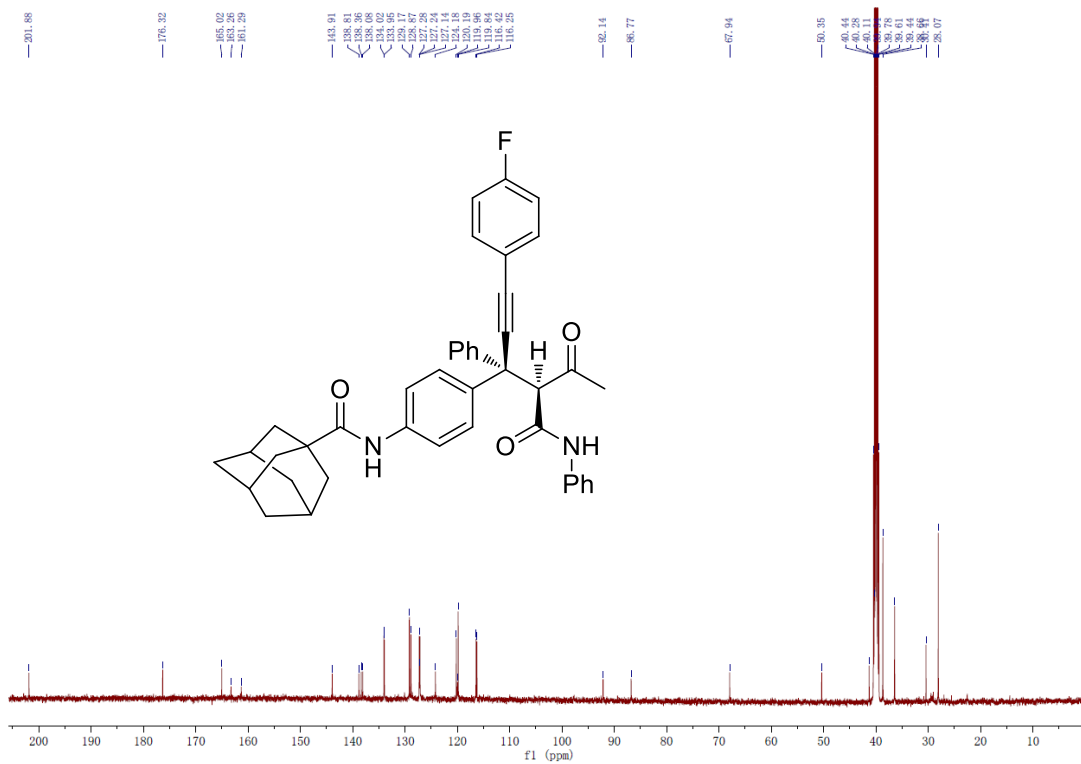





**(1*r*,3*R*,5*S*)-*N*-(4-((3*R*,4*S*)-1-(4-bromophenyl)-5-oxo-3-phenyl-4-(phenylcarbamoyl)hex-1-yn-3-yl)phenyl)adamantane-1-carboxamide (3ga)**

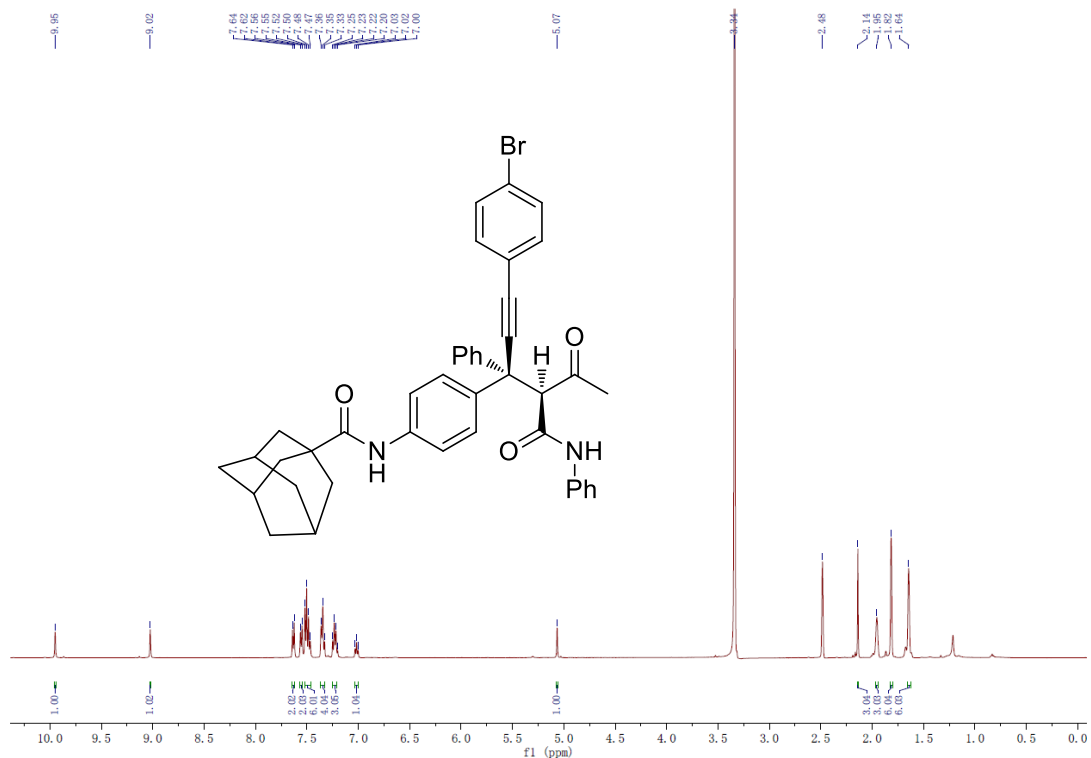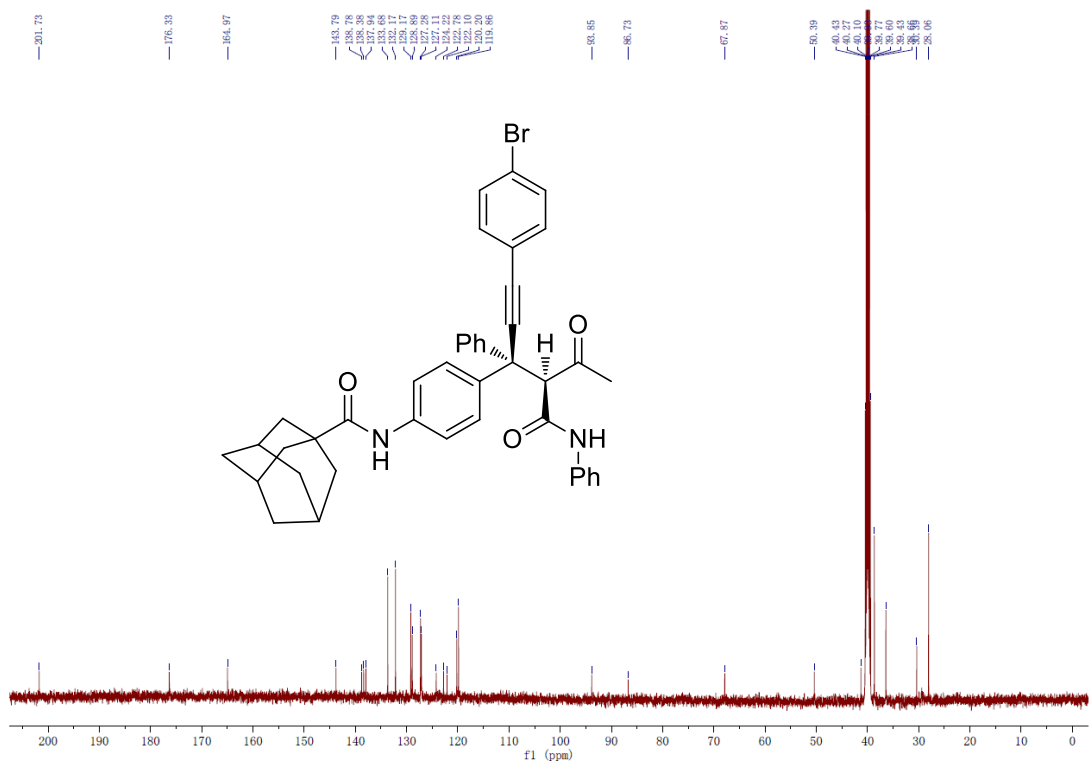

**(1*r*,3*R*,5*S*)-*N*-(4-((3*R*,4*S*)-1-(4-methoxyphenyl)-5-oxo-3-phenyl-4-(phenylcarbamoyl)hex-1-yn-3-yl)phenyl)adamantane-1-carboxamide (3ha)**

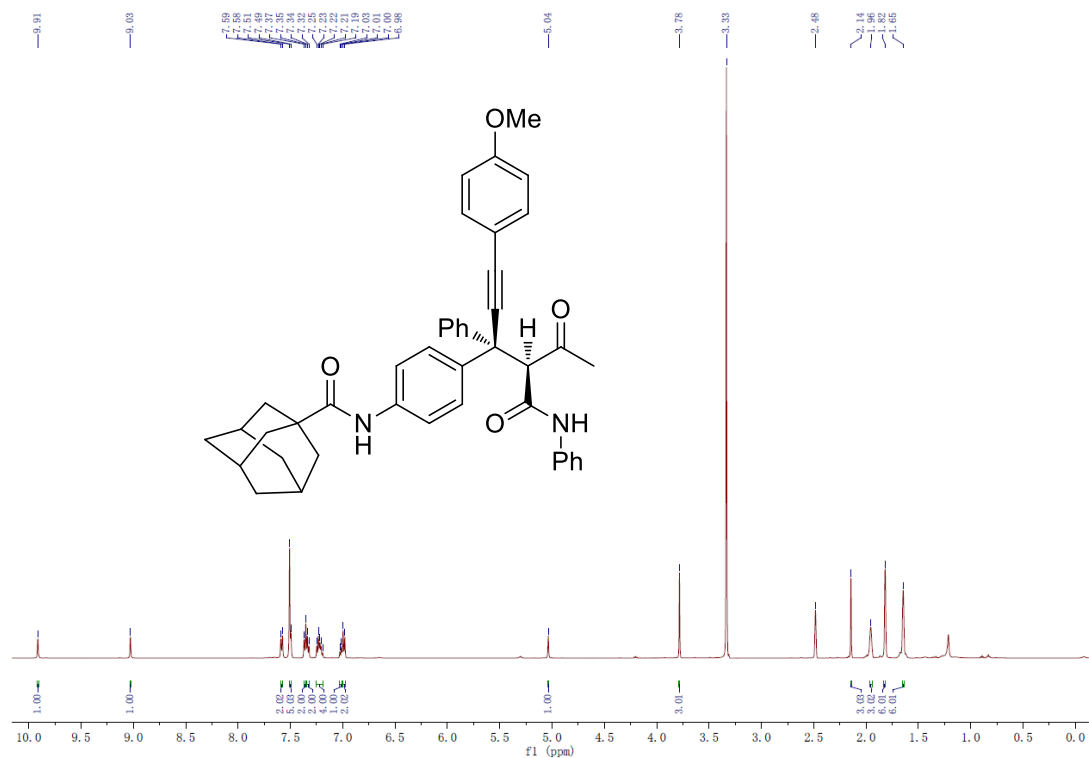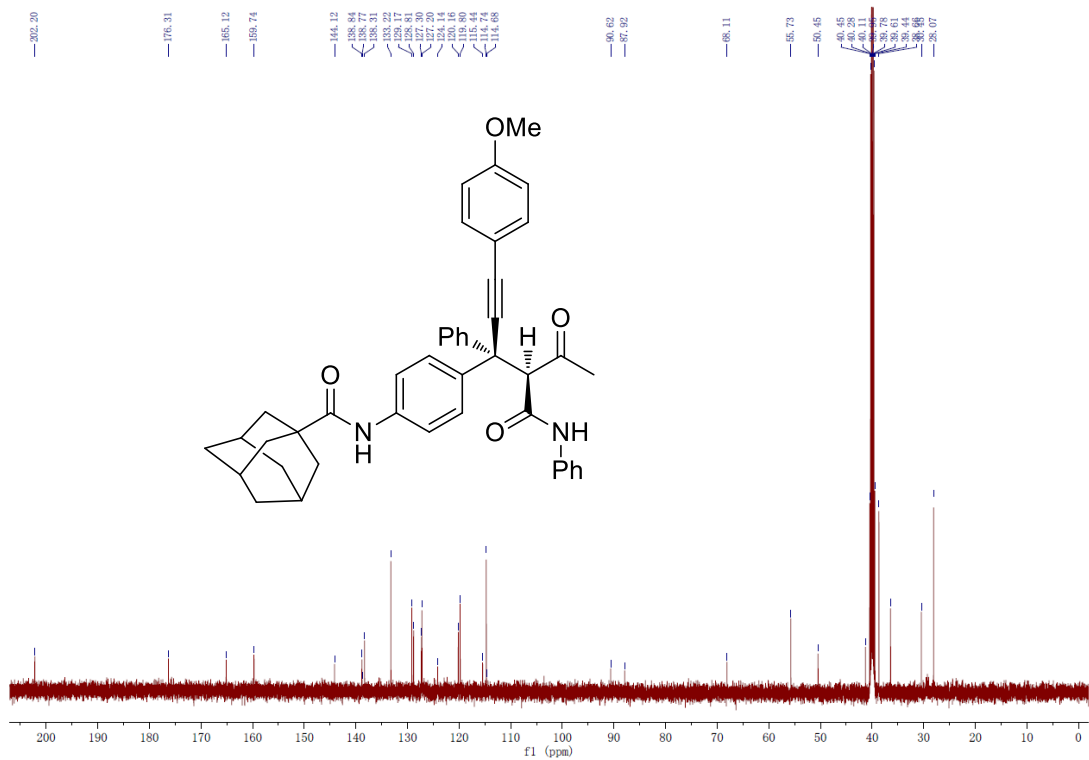



**(1*r*,3*R*,5*S*)-N-(4-((3*R*,4*S*)-1-(3-bromophenyl)-5-oxo-3-phenyl-4-(phenylcarbamoyl)hex-1-yn-3-yl)phenyl)adamantane-1-carboxamide (3ja)**

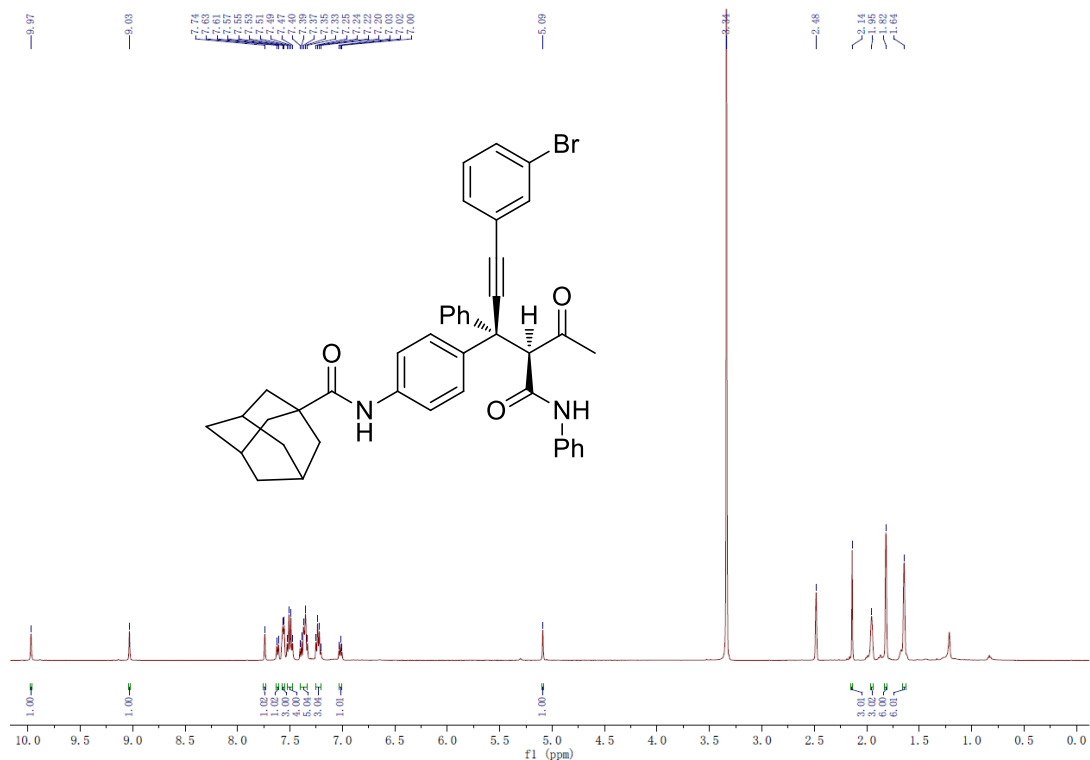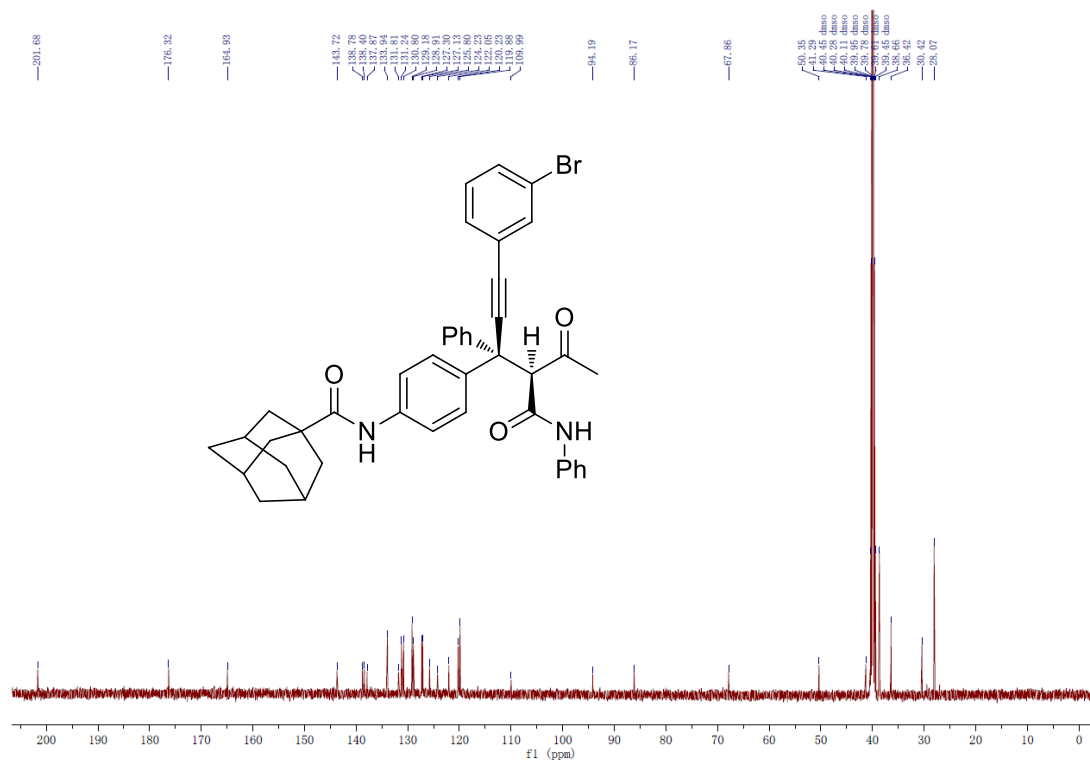

**(1*r*,3*R*,5*S*)-*N*-(4-((3*R*,4*S*)-5-oxo-3-phenyl-4-(phenylcarbamoyl)-1-(*m*-tolyl)hex-1-yn-3-yl)phenyl)adamantane-1-carboxamide (3ka)**

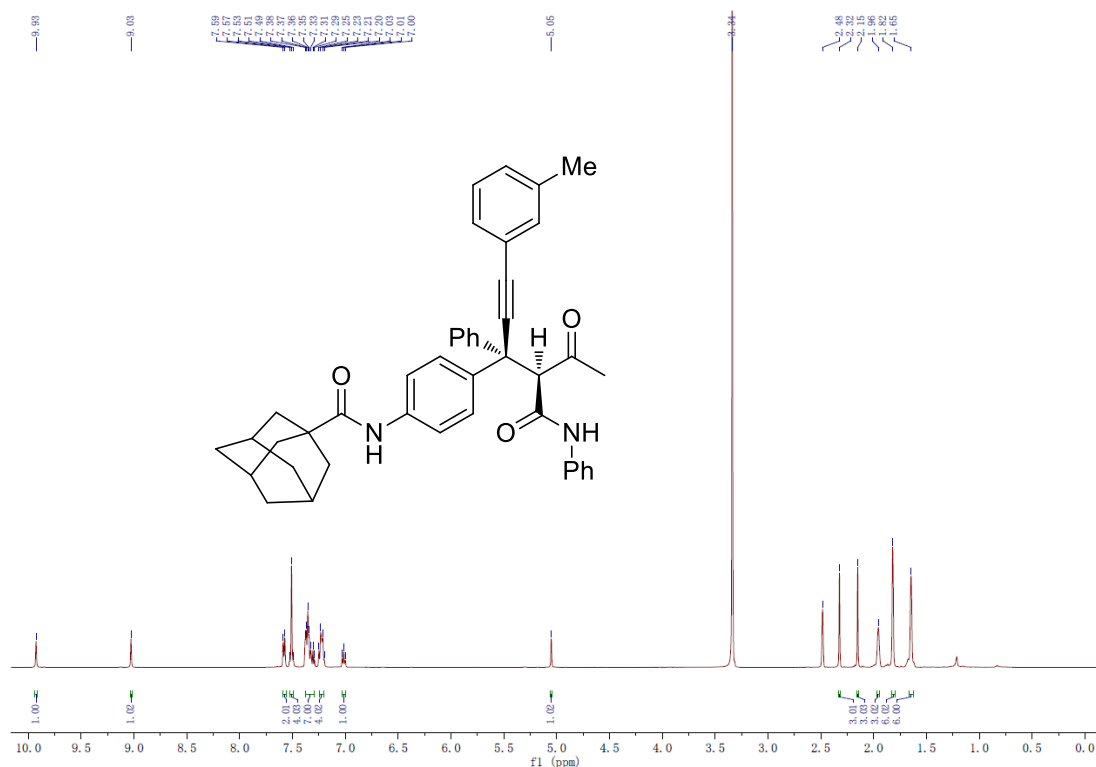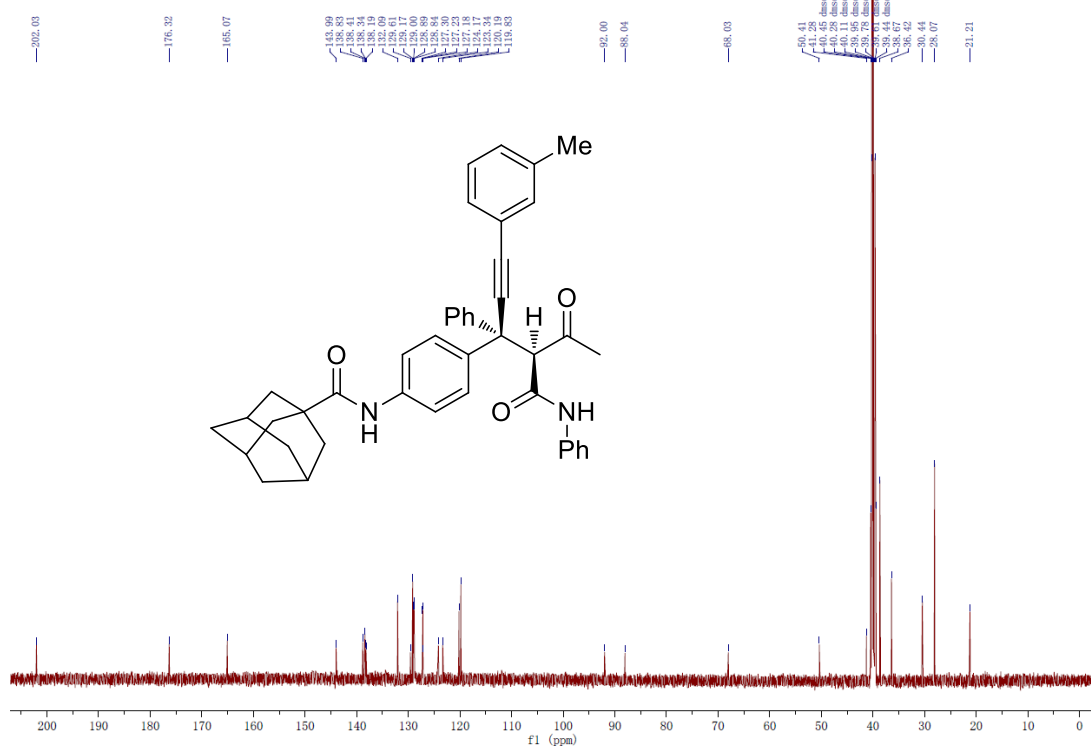

**(1*r*,3*R*,5*S*)-*N*-(4-((3*R*,4*S*)-1-(2-fluorophenyl)-5-oxo-3-phenyl-4-(phenylcarbamoyl)hex-1-yn-3-yl)phenyl)adamantane-1-carboxamide (3a)**

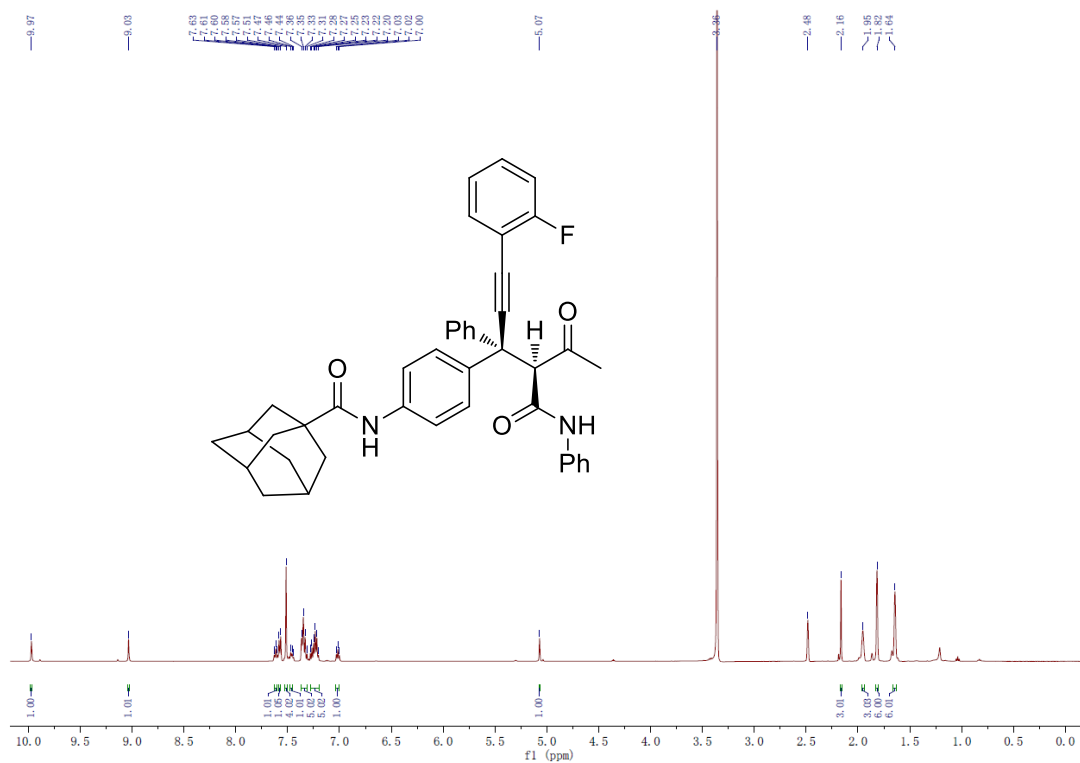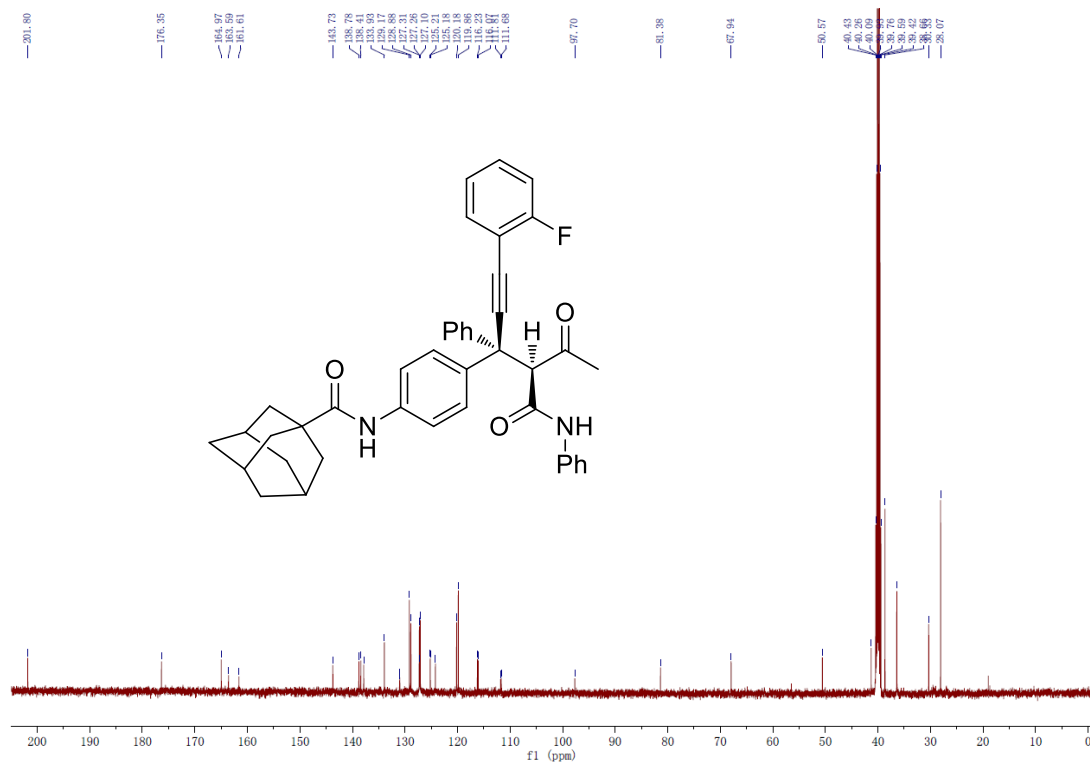





**(1*r*,3*R*,5*S*)-N-(4-((3*R*,4*S*)-1-(2-bromophenyl)-5-oxo-3-phenyl-4-(phenylcarbamoyl)hex-1-yn-3-yl)phenyl)adamantane-1-carboxamide (3na)**

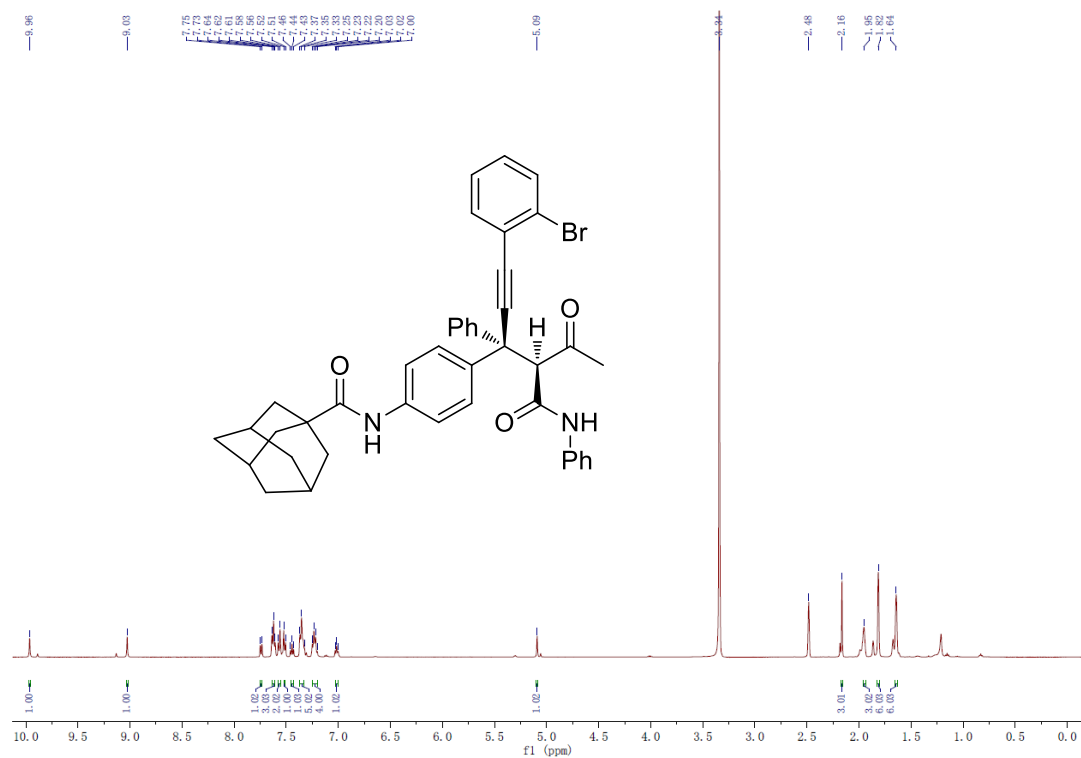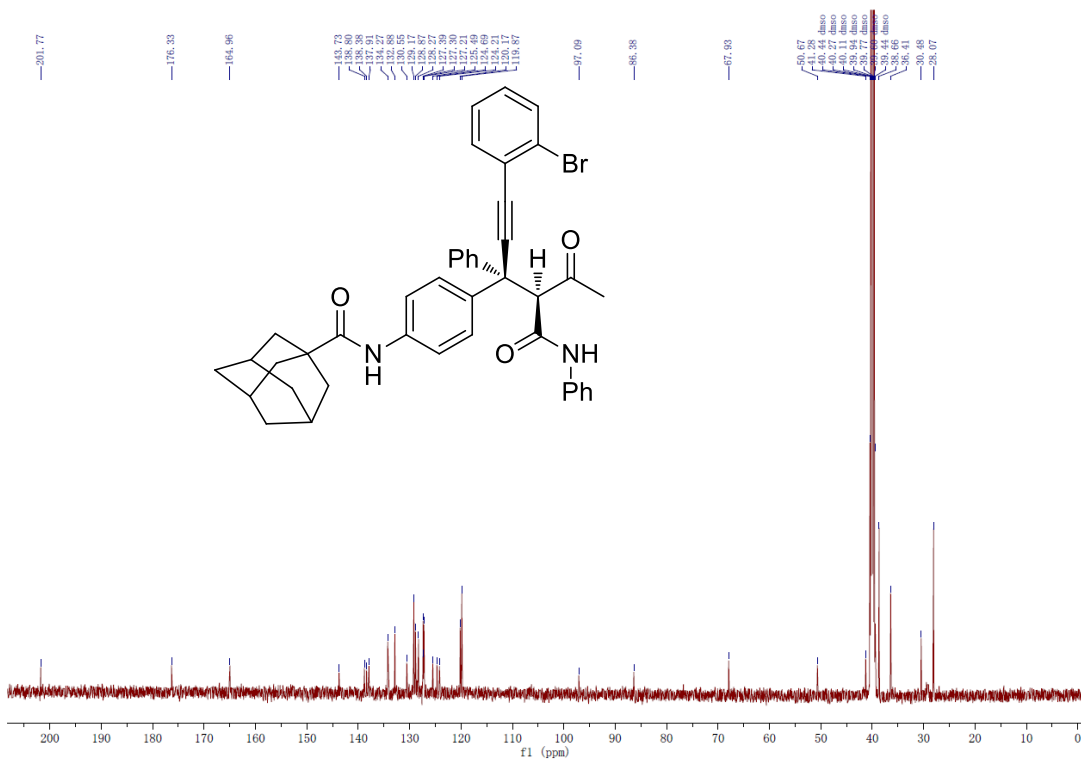

**(1*r*,3*R*,5*S*)-*N*-(4-((3*R*,4*S*)-1-(2-methoxyphenyl)-5-oxo-3-phenyl-4-(phenylcarbamoyl)hex-1-yn-3-yl)phenyl)adamantane-1-carboxamide (30a)**

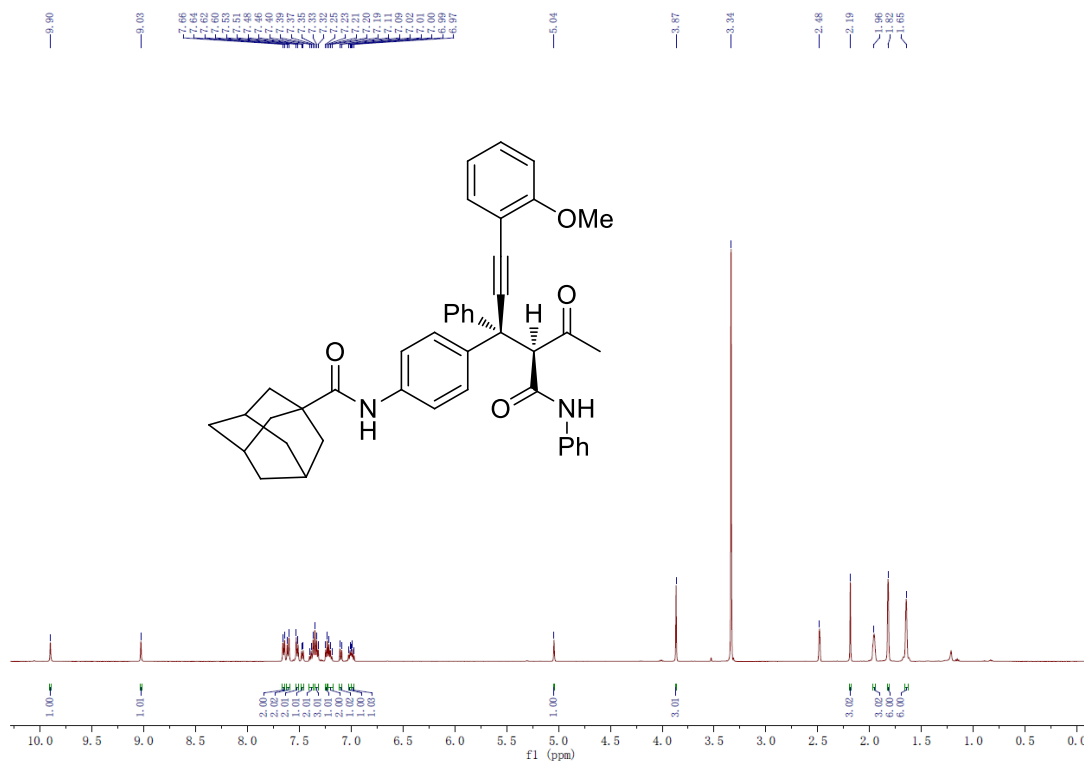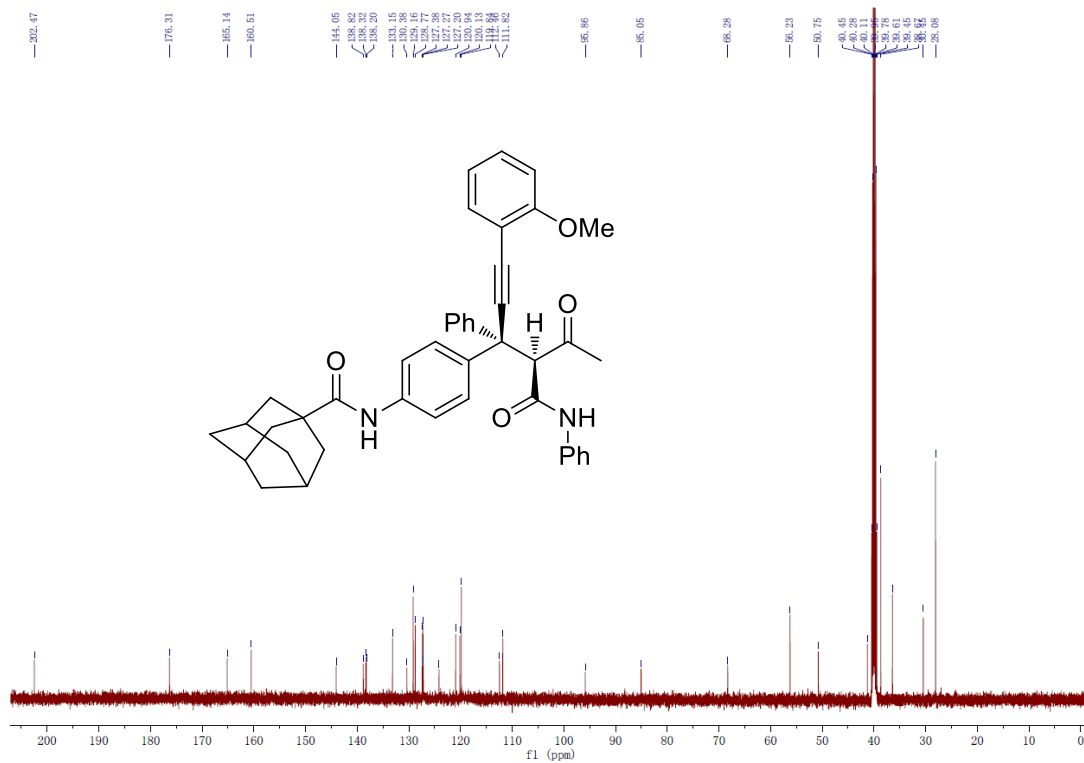



**(1*r*,3*R*,5*S*)-*N*-(4-((3*R*,4*S*)-1-cyclopropyl-5-oxo-3-phenyl-4-(phenylcarbamoyl)hex-1-yn-3-yl)phenyl)adamantane-1-carboxamide (3qa)**

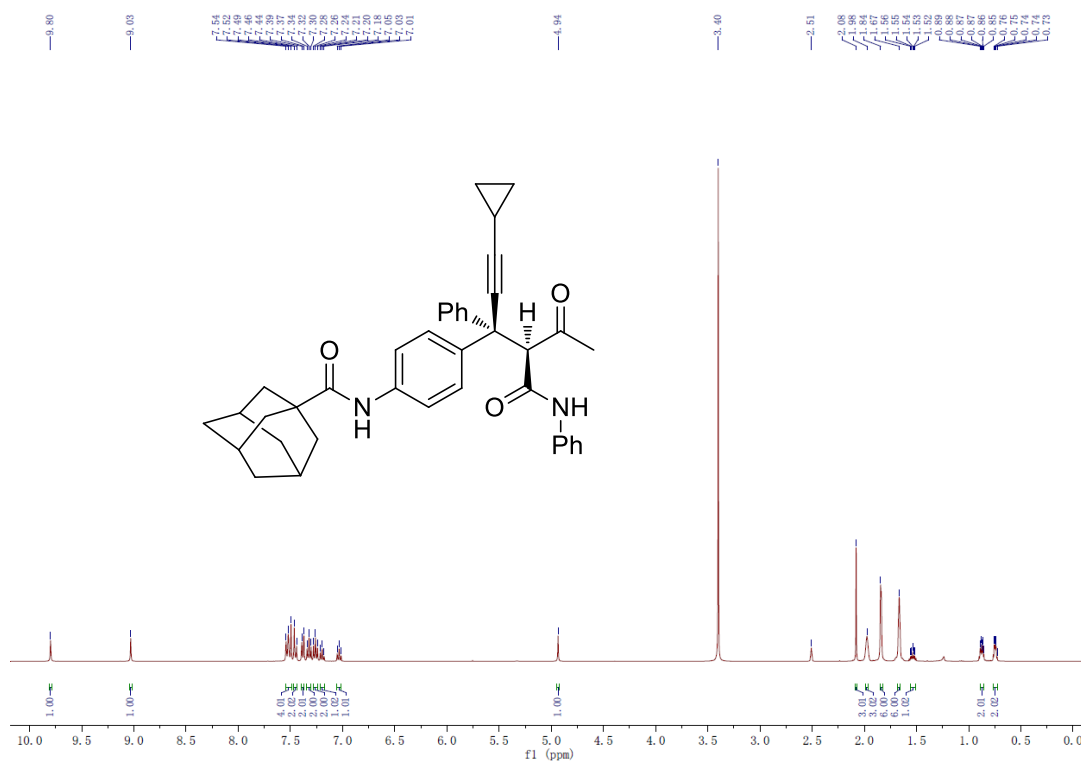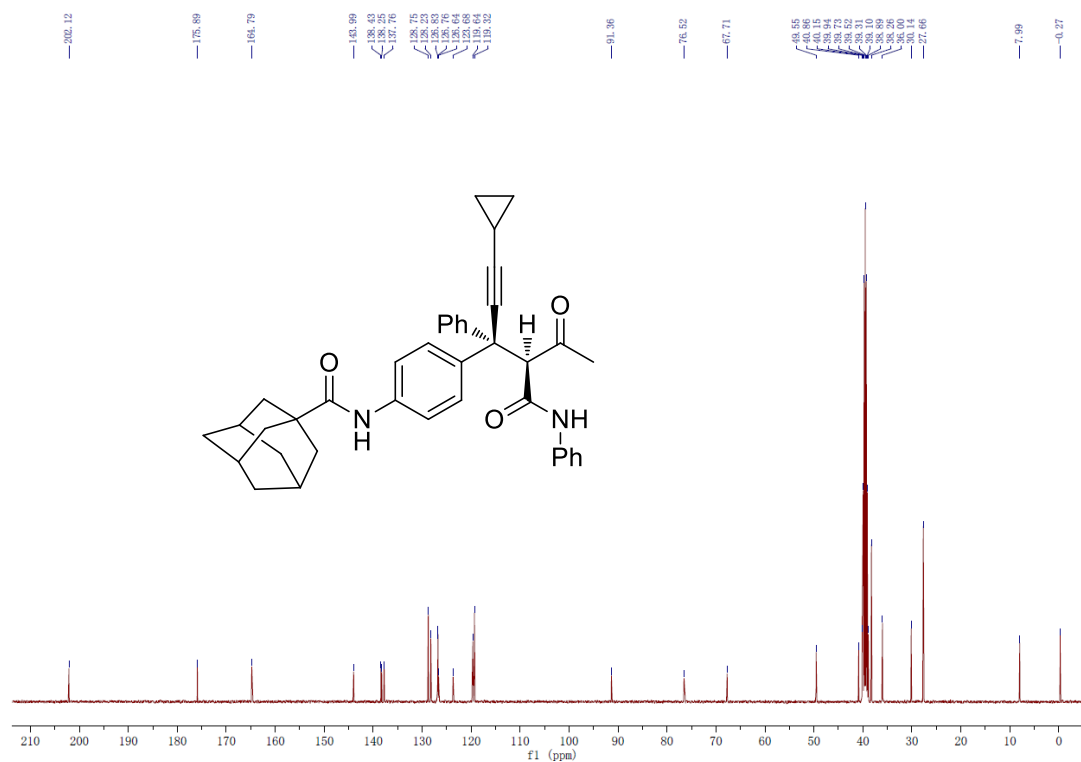



**(1*r*,3*R*,5*S*)-*N*-(4-((3*R*,4*S*)-5-oxo-1,3-diphenyl-4-(*p*-tolylcarbamoyl)hex-1-yn-3-yl)phenyl)adamantane-1-carboxamide (3*c*)**

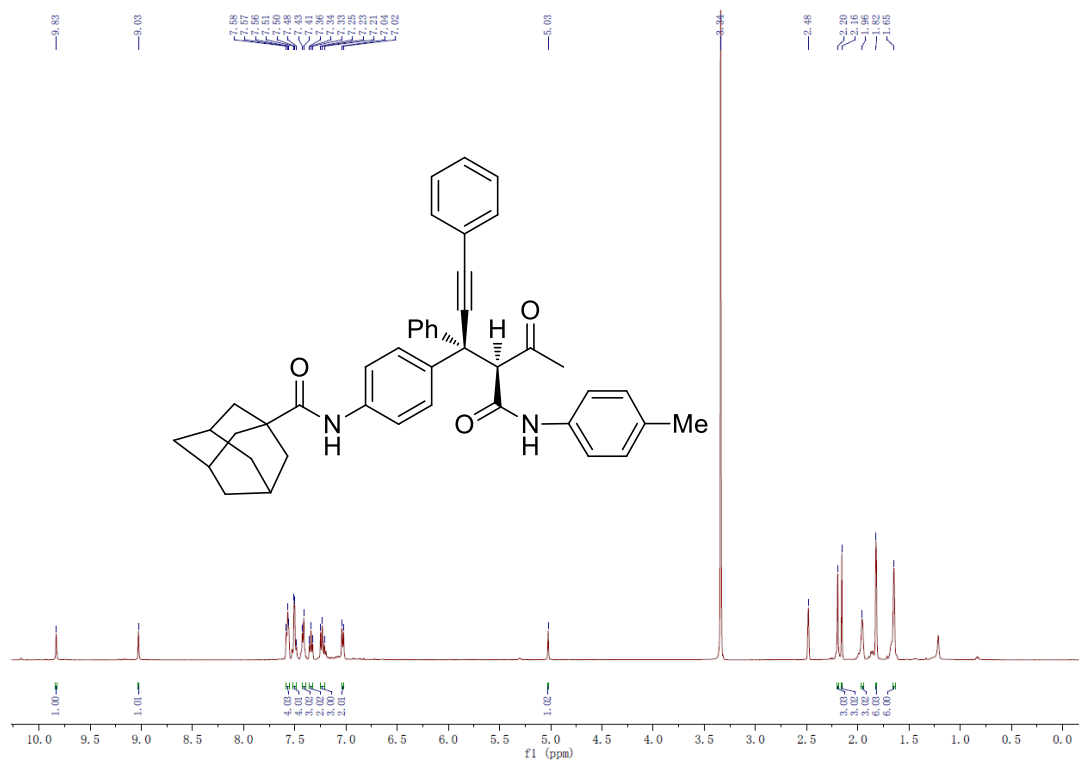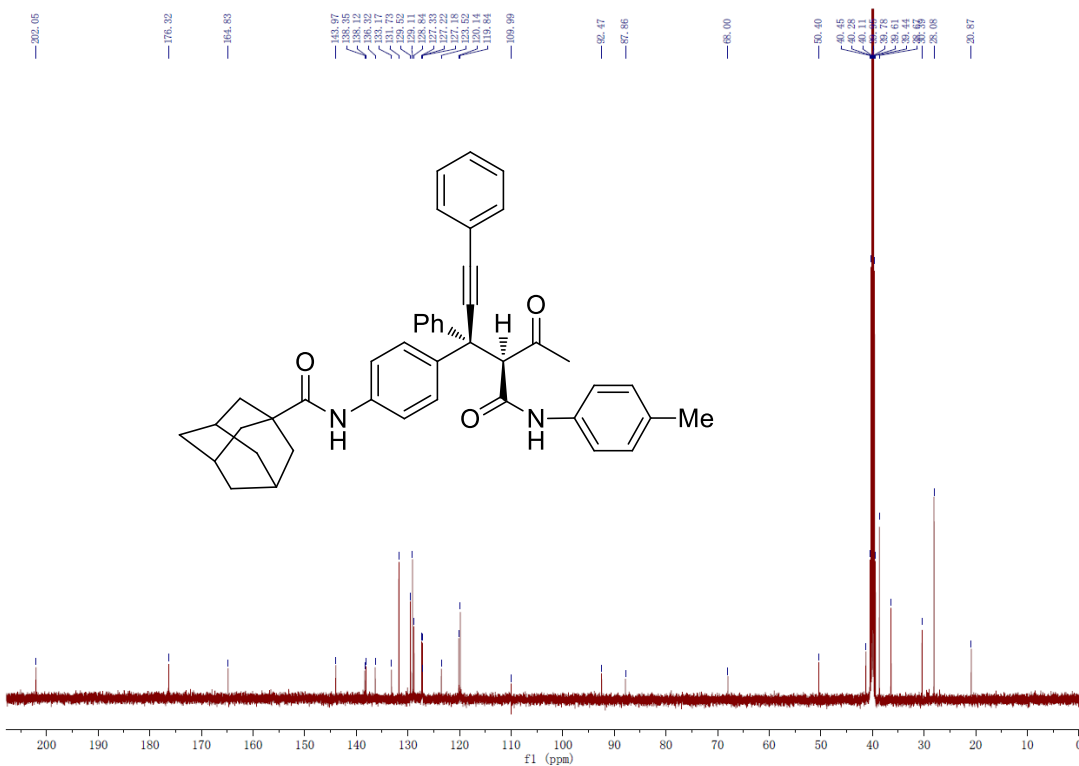



**(1*r*,3*R*,5*S*)-*N*-(4-((3*R*,4*S*)-5-oxo-1,3-diphenyl-4-((4-(trifluoromethyl)phenyl)carbamoyl)hex-1-yn-3-yl)phenyl)adamantane-1-carboxamide (3ae)**

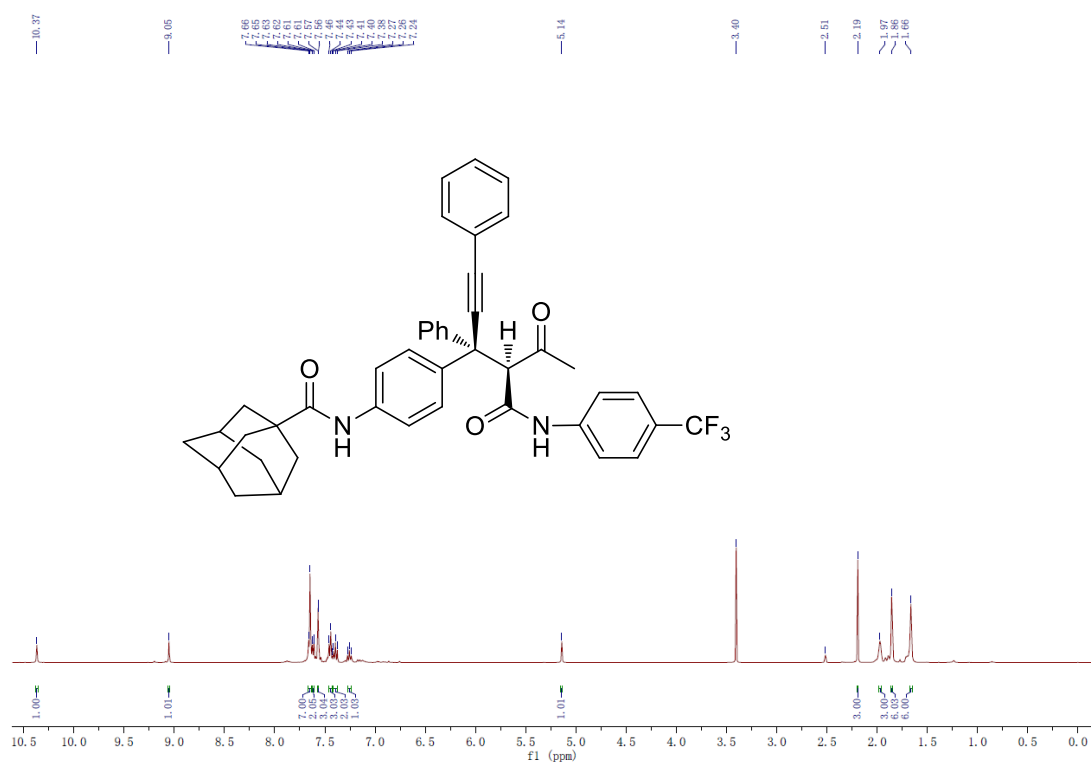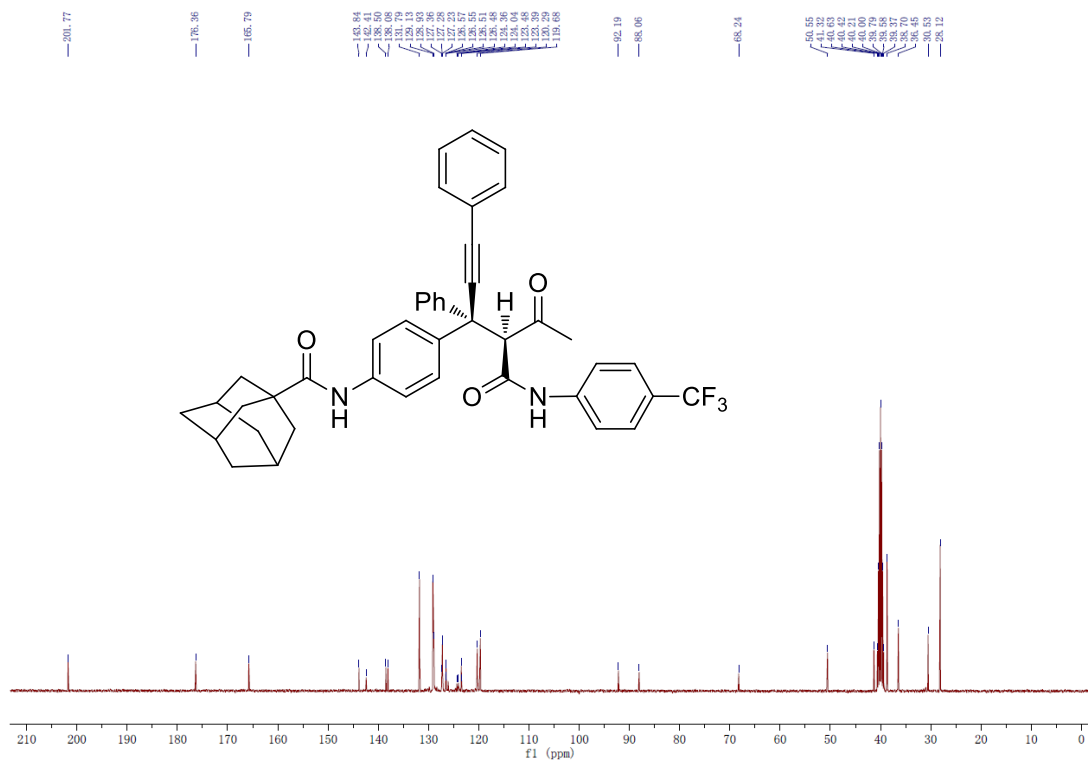



**(1*r*,3*R*,5*S*)-*N*-(4-((3*R*,4*S*)-5-oxo-1,3-diphenyl-4-(*o*-tolylcarbamoyl)hex-1-yn-3-yl)phenyl)adamantane-1-carboxamide (3af)**

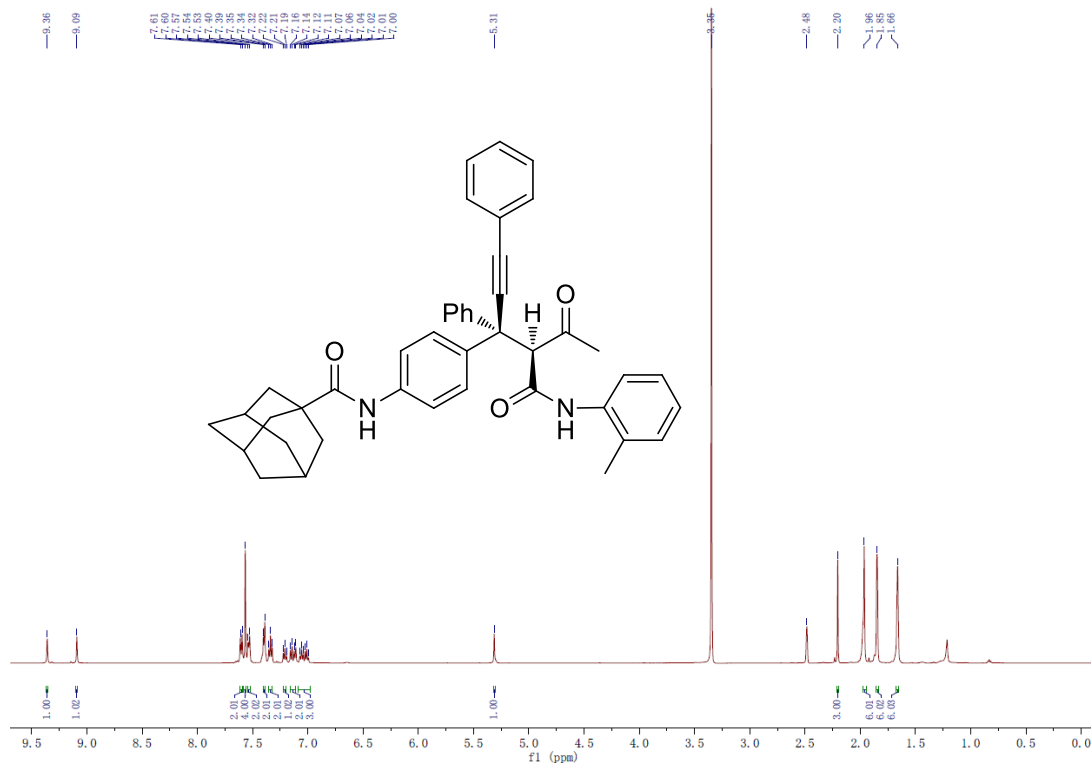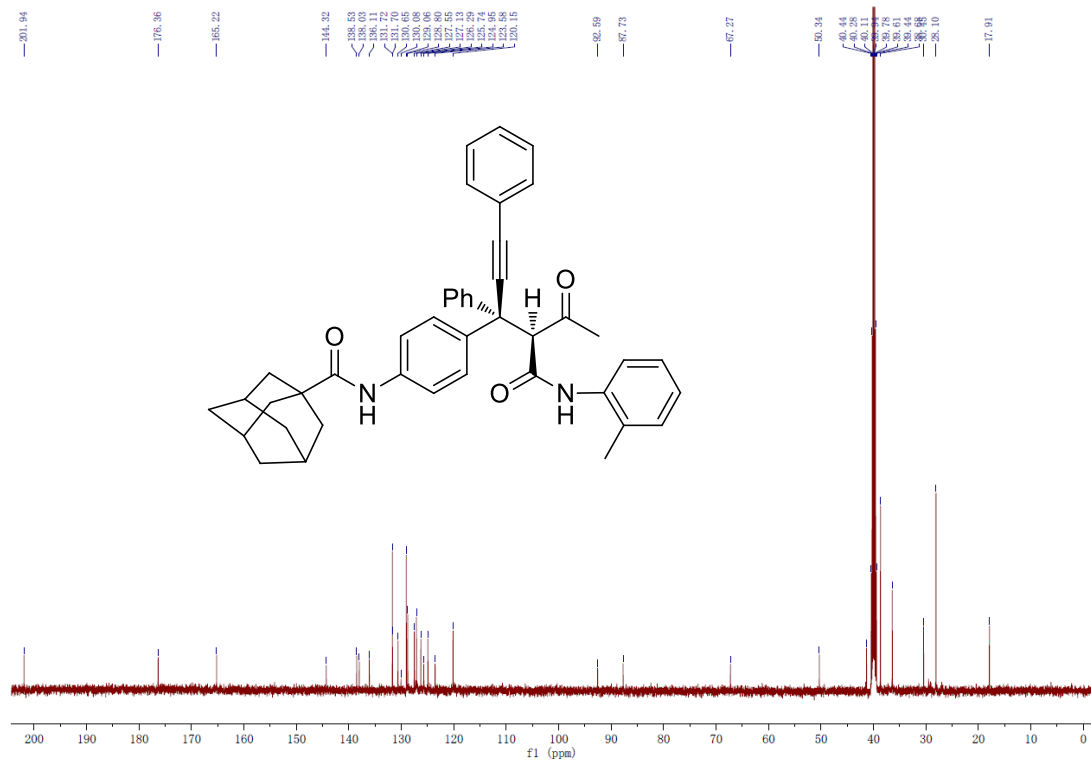



**(1*r*,3*R*,5*S*)-*N*-(4-((3*R*,4*S*)-6-methyl-5-oxo-1,3-diphenyl-4-(phenylcarbamoyl)hept-1-yn-3-yl)phenyl)adamantane-1-carboxamide (3ah)**

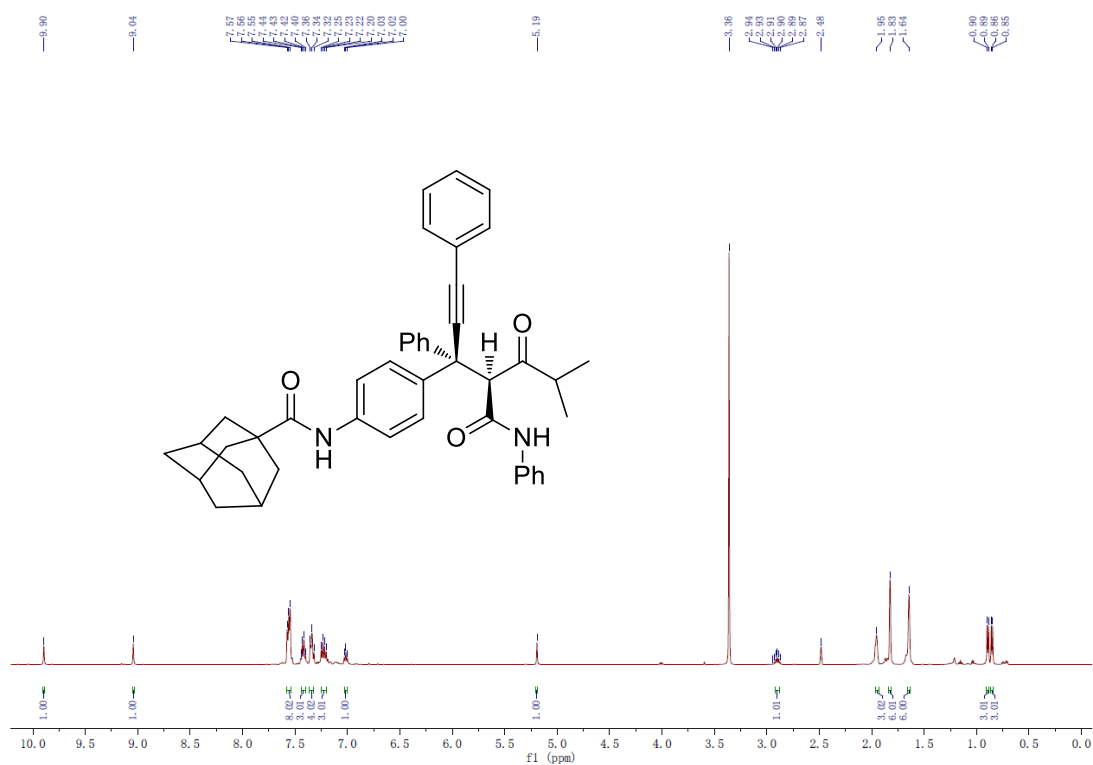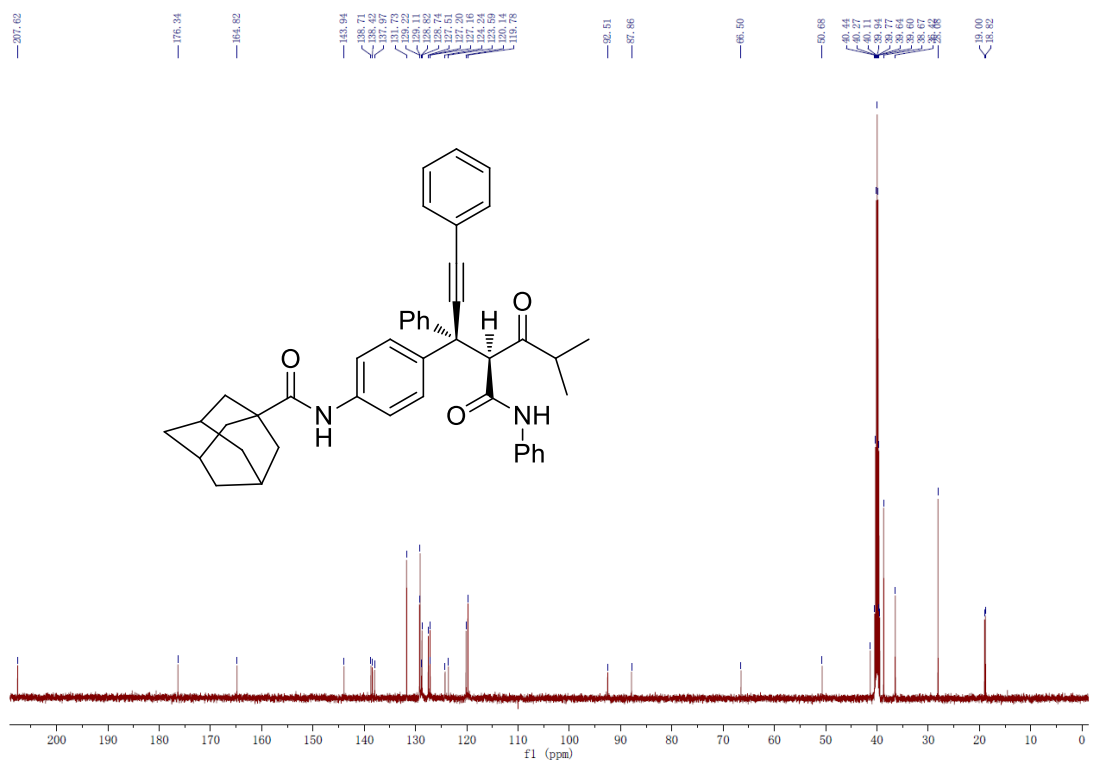

***N*-4-((3*R*,4*S*)-5-oxo-1,3-diphenyl-4-(phenylcarbamoyl)hex-1-yn-3-yl)phenyl)-3,5-bis(trifluoromethyl)benzamide (3ba)**

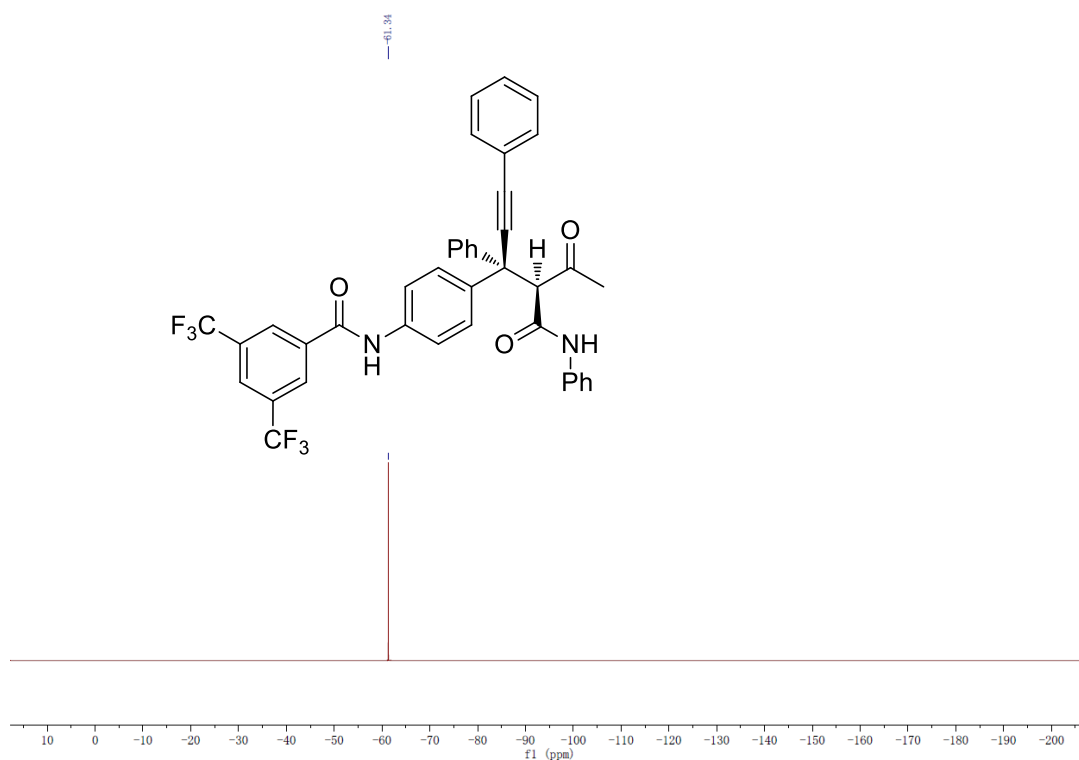

**(1*r*,3*R*,5*S*)-*N*-4-((3*R*,4*S*)-1-(4-fluorophenyl)-5-oxo-3-phenyl-4-(phenylcarbamoyl)hex-1-yn-3-yl)phenyl)adamantane-1-carboxamide (3ea)**

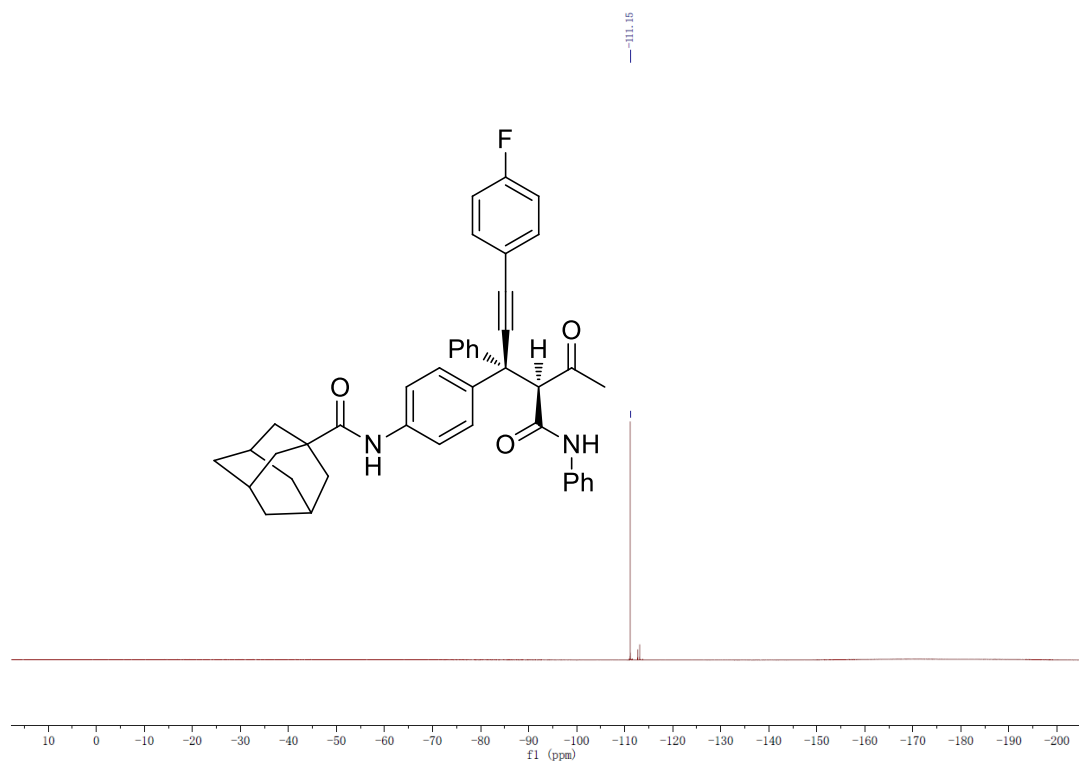

**(1*r*,3*R*,5*S*)-*N*-(4-((3*R*,4*S*)-1-(3-fluorophenyl)-5-oxo-3-phenyl-4-(phenylcarbamoyl)hex-1-yn-3-yl)phenyl)adamantane-1-carboxamide (3ia)**

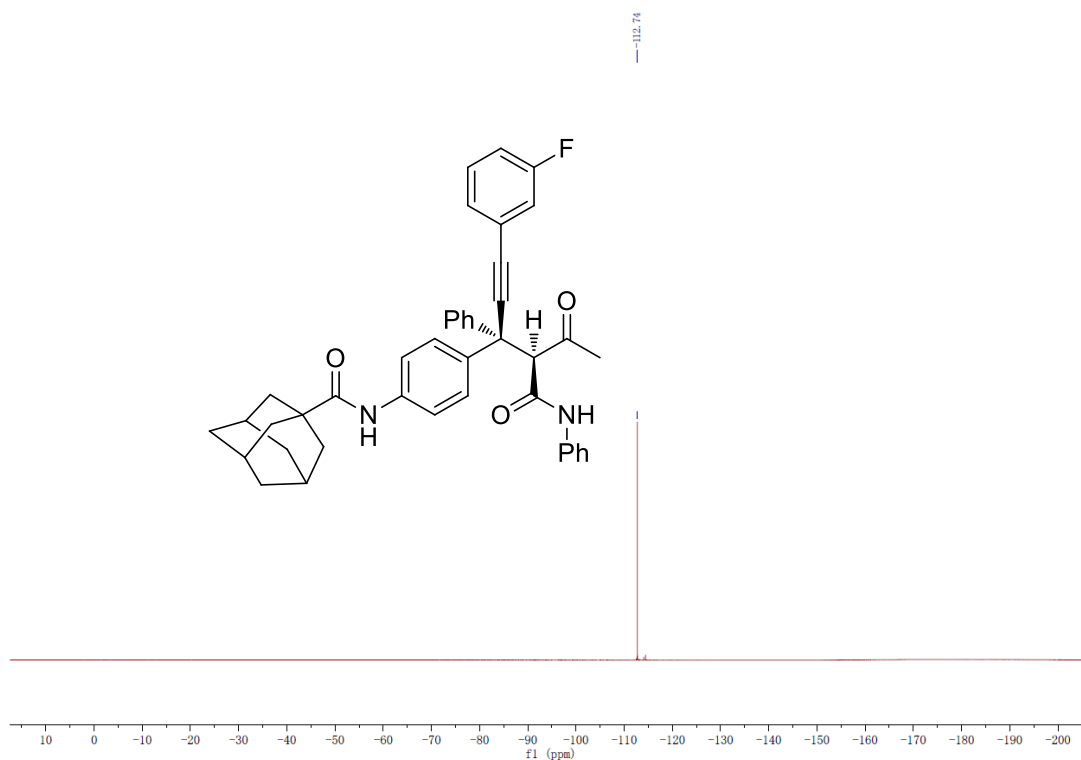

**(1*r*,3*R*,5*S*)-*N*-(4-((3*R*,4*S*)-1-(2-fluorophenyl)-5-oxo-3-phenyl-4-(phenylcarbamoyl)hex-1-yn-3-yl)phenyl)adamantane-1-carboxamide (3la)**

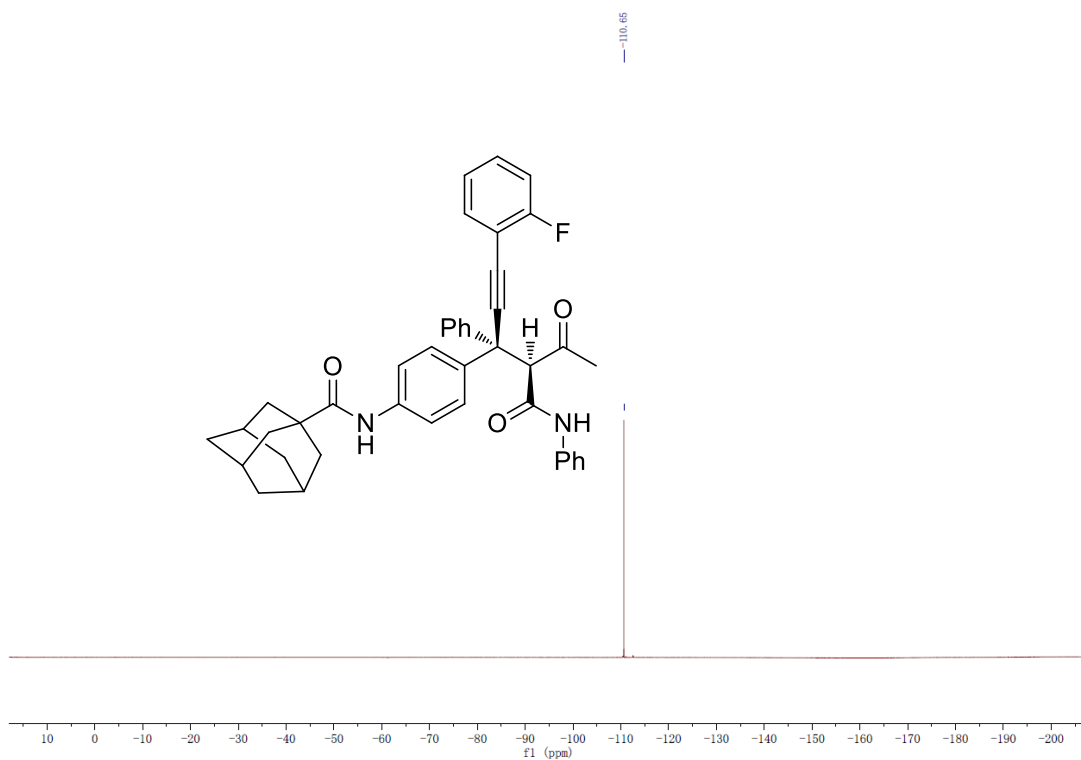

**(1*r*,3*R*,5*S*)-*N*-(4-((3*R*,4*S*)-5-oxo-1,3-diphenyl-4-((4-(trifluoromethyl)phenyl)carbamoyl)hex-1-yn-3-yl)phenyl)adamantane-1-carboxamide (3ae)**

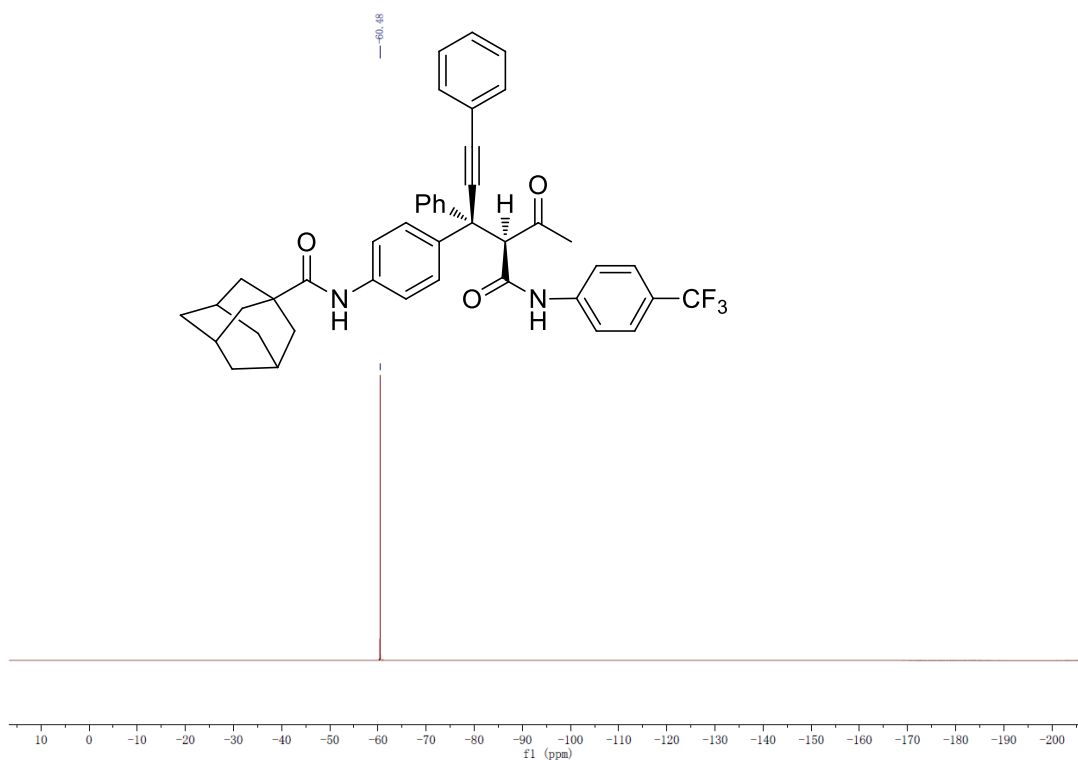

# K: X-Ray Analysis Data

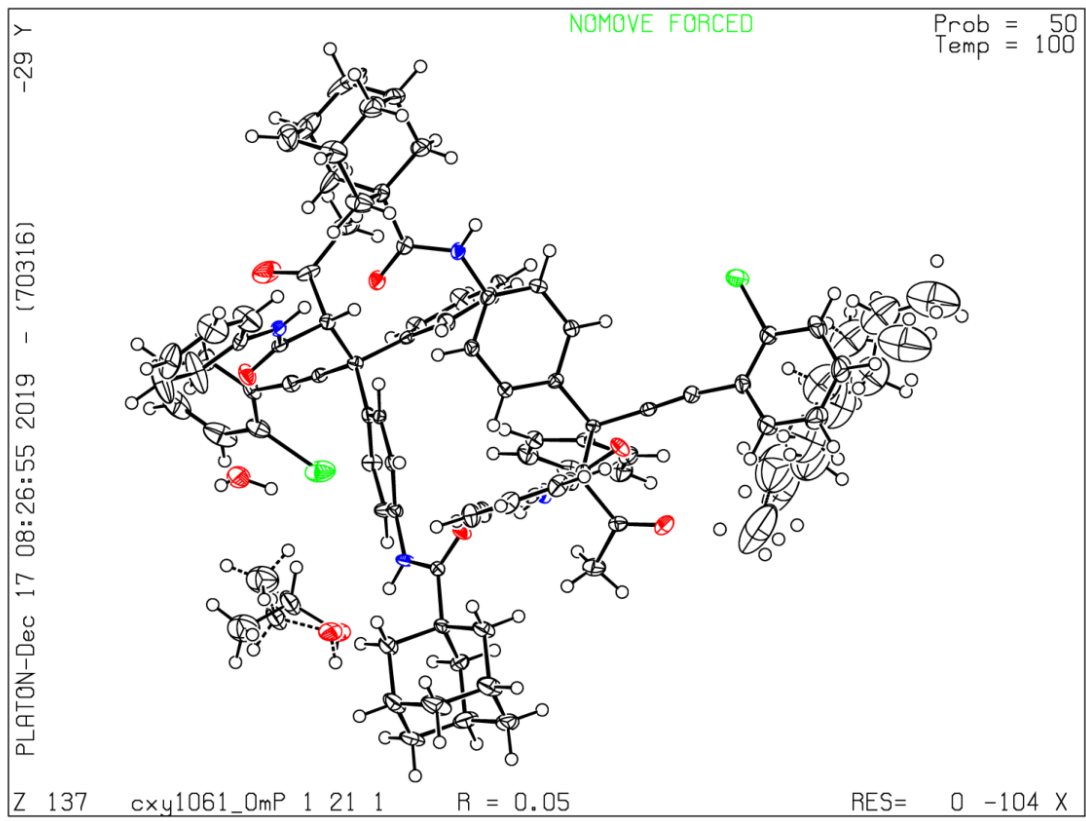

**Table Crystal data and structure refinement for 3na.**

|                                             |                                                                 |
|---------------------------------------------|-----------------------------------------------------------------|
| Identification code                         | <b>3na</b>                                                      |
| Empirical formula                           | C <sub>42</sub> H <sub>39</sub> BrN <sub>2</sub> O <sub>3</sub> |
| Formula weight                              | 698.21                                                          |
| Temperature/K                               | 100                                                             |
| Crystal system                              | monoclinic                                                      |
| Space group                                 | P2 <sub>1</sub>                                                 |
| a/Å                                         | 11.8175(4)                                                      |
| b/Å                                         | 22.6082(8)                                                      |
| c/Å                                         | 15.1003(6)                                                      |
| α/°                                         | 90                                                              |
| β/°                                         | 94.6410(10)                                                     |
| γ/°                                         | 90                                                              |
| Volume/Å <sup>3</sup>                       | 4021.2(3)                                                       |
| Z                                           | 2                                                               |
| ρ <sub>calc</sub> /g/cm <sup>3</sup>        | 1.279                                                           |
| μ/mm <sup>-1</sup>                          | 1.067                                                           |
| F(000)                                      | 1626.0                                                          |
| Crystal size/mm <sup>3</sup>                | 0.36 × 0.28 × 0.26                                              |
| Radiation                                   | MoKα (λ = 0.71073)                                              |
| 2θ range for data collection/°              | 4.506 to 55.134                                                 |
| Index ranges                                | -15 ≤ h ≤ 15, -29 ≤ k ≤ 29, -19 ≤ l ≤ 19                        |
| Reflections collected                       | 59272                                                           |
| Independent reflections                     | 18547 [R <sub>int</sub> = 0.0514, R <sub>sigma</sub> = 0.0613]  |
| Data/restraints/parameters                  | 18547/96/994                                                    |
| Goodness-of-fit on F <sup>2</sup>           | 1.033                                                           |
| Final R indexes [I >= 2σ (I)]               | R <sub>1</sub> = 0.0483, wR <sub>2</sub> = 0.1100               |
| Final R indexes [all data]                  | R <sub>1</sub> = 0.0671, wR <sub>2</sub> = 0.1185               |
| Largest diff. peak/hole / e Å <sup>-3</sup> | 0.56/-0.54                                                      |
| Flack parameter                             | -0.005(3)                                                       |



## **L: Reference**

1. a) M. Chen, J. Sun, *Angew. Chem. Int. Ed.* **2017**, *56*, 4583. b) D. Qian, L. Wu, Z. Lin, J. Sun, *Nat. Commun.* **2017**, *8*, 567.
